# Supplementary material for: Efficacy and safety of cAMP signalling-biased GLP-1 analogue ecnoglutide monotherapy versus placebo in patients with type 2 diabetes (EECOH-1): a randomised, double-blind, placebo-controlled, phase 3 trial
Source: Research Square preprint supplement (doi:10.21203/rs.3.rs-6342890/v1), 2025-05-22
Supplement: Supplementary file 1 [file d3ef56968500045ab15165b3.docx]

**A Multi-Center, Randomized, Double-Blind, Placebo-Controlled Phase III Clinical Study of XW003 Injection in Adult T2DM (Type 2 Diabetes Mellitus) Subjects with Poor Glycemic Control After Nutrition and Exercise Interventions (EECOH-1)**

Protocol No.: SCW0502-1031

Statistical Analysis Plan

Version: 2.0

**Date: July 16, 2024**

Signature Page

| **Author from R&G PharmaStudies Co., Ltd.:** | | | |
| --- | --- | --- | --- |
|  |  |  | |
| Chao Chen, Statistician  R&G PharmaStudies Co., Ltd. |  | Date  (MM/DD/YY) | |
|  |  | |  |
| **Approver from Hangzhou Sciwind Biosciences Co., Ltd.:** |  | |  |
|  |  | |  |
| Shaohui Bing, Senior Medical Manager  Hangzhou Sciwind Biosciences Co., Ltd. |  | Date  (MM/DD/YY) | |

| Lei Guan, Project Manager  Hangzhou Sciwind Biosciences Co., Ltd. |  | Date  (MM/DD/YY) |
| --- | --- | --- |

**Table of Contents**

[Signature Page 2](#_Toc177748020)

[List of Abbreviations 5](#_Toc177748021)

[Version History 7](#_Toc177748022)

[1. Introduction 8](#_Toc177748023)

[2. Study Overview 8](#_Toc177748024)

[2.1. Study Objectives, Endpoints and Estimands 8](#_Toc177748025)

[2.1.1. Study Objectives 8](#_Toc177748026)

[2.1.2. Study Endpoints 8](#_Toc177748027)

[2.1.3. Estimands 9](#_Toc177748028)

[2.2. Study Design 11](#_Toc177748029)

[2.3. Estimation of Sample Size 11](#_Toc177748030)

[2.4. Hypothesis Testing and Multiplicity 12](#_Toc177748031)

[2.5. Randomization 12](#_Toc177748032)

[3. Analysis Population 13](#_Toc177748033)

[4. Planned Analysis Time Point 13](#_Toc177748034)

[5. Statistical Analysis Method 14](#_Toc177748035)

[5.1. General Principles 14](#_Toc177748036)

[5.2. Study Drug 14](#_Toc177748037)

[5.3. Treatment Period 14](#_Toc177748038)

[5.4. Definition of Baseline 15](#_Toc177748039)

[5.5. Handling of Missing Data 16](#_Toc177748040)

[5.5.1. Handling of Missing Efficacy Data 16](#_Toc177748041)

[5.5.2. Handling of Missing Safety Data 16](#_Toc177748042)

[5.5.3. Handling of Other Missing Data 17](#_Toc177748043)

[5.6. Subject Disposition 17](#_Toc177748044)

[5.7. Protocol Deviation 18](#_Toc177748045)

[5.8. Subject Information 18](#_Toc177748046)

[5.8.1. Demographics and Baseline Characteristics 18](#_Toc177748047)

[5.8.2. Past/Concomitant Medical History and Surgical History 18](#_Toc177748048)

[5.8.3. Prior/Concomitant Treatments 19](#_Toc177748049)

[5.8.4. History of Diabetes Mellitus 20](#_Toc177748050)

[5.8.5. Drugs for Rescue Therapy 21](#_Toc177748051)

[5.9. Efficacy Analysis 21](#_Toc177748052)

[5.9.1. Primary Estimand 21](#_Toc177748053)

[5.9.2. Secondary Estimand 1 24](#_Toc177748054)

[5.9.3. Secondary Estimand 2 24](#_Toc177748055)

[5.9.4. Others Secondary Efficacy Endpoints 25](#_Toc177748056)

[5.10. Safety Analyses 26](#_Toc177748057)

[5.10.1. Exposure to and Compliance with Study Drug 26](#_Toc177748058)

[5.10.2. Adverse Event 27](#_Toc177748059)

[5.10.3. Laboratory Tests 29](#_Toc177748060)

[5.10.4. 12-lead ECG 29](#_Toc177748061)

[5.10.5. Vital Signs 29](#_Toc177748062)

[5.10.6. Physical Examination 30](#_Toc177748063)

[5.10.7. Plasma Glucose Monitoring 30](#_Toc177748064)

[5.10.8. Viral Serology 30](#_Toc177748065)

[5.11. Pharmacokinetic Analysis 30](#_Toc177748066)

[5.11.1. Pharmacokinetic Endpoints 30](#_Toc177748067)

[5.11.2. Plasma Concentration and Plasma Concentration-Time Curve 30](#_Toc177748068)

[5.12. Immunogenicity 31](#_Toc177748069)

[5.13. Interim Analysis 31](#_Toc177748070)

[6. Deviations from Protocol 31](#_Toc177748071)

[7. References 31](#_Toc177748072)

List of Abbreviations

| **Abbreviation** | **Term** |
| --- | --- |
| ADA | Anti-drug antibody |
| AE | Adverse Event |
| AESI | Adverse Event of Special Interest |
| ANCOVA | Analysis of covariance |
| AR (1) | First-order auto-regression |
| ATC Level 2 | Treatment subgroup |
| cm | Centimeter |
| CI | Confidence interval |
| CS | Compound Symmetry |
| CSR | Clinical Study Report |
| Ctrough | Trough concentration at dosing intervals |
| CTCAE | Common Terminology Criteria for Adverse Events |
| CV | Coefficient of variation |
| DBL | Database lock |
| ECG | Electrocardiogram |
| ETD | Estimated treatment difference |
| eCRF | Electronic Case Report Form |
| FAS | Full Analysis Set |
| FPG | Fasting plasma glucose |
| FT3 | Free tri-iodothyronine |
| FT4 | Free tetra-iodothyronine |
| GLP-1 | Glucagon-like peptide 1 |
| HbA1c | Glycosylated hemoglobin |
| HDL | High-density lipoprotein |
| HOMA-IR | Insulin resistance index |
| HOMA-β | Islet β cell function index |
| INT | Integer |
| J2R | Jump to reference |
| kg | Kilogram |
| L | Liter |
| LDL | Low-density lipoprotein |
| MAR | Missing at random |
| MedDRA | Medical Dictionary for Regulatory Activities |
| m | Meter |
| mg | Milligram |
| min | Minute |
| ml | Milliliter |
| MCMC | Markov Chain Monte Carlo |
| MMRM | Mixed-effects model for repeated measures |
| mmol | Millimole |
| OR | Odds ratio |
| PASS | Calculation software of sample size |
| PKCS | Pharmacokinetic concentration set |
| PKPS | Pharmacokinetic parameter set |
| PN | Preferred name |
| PPS | Per-protocol Set |
| PT | Preferred Term |
| Q1 | Lower Quartile |
| Q3 | Upper Quartile |
| RDO | Retrieved dropout |
| REML | Restricted maximum likelihood |
| SAE | Serious adverse event |
| SAP | Statistical Analysis Plan |
| SAS | Statistical Analysis Software |
| SD | Standard deviation |
| SOC | System Organ Class |
| SS | Safety Set |
| T2DM | Type 2 diabetes mellitus |
| TG | Triglycerides |
| Tipping point | Tipping point analysis |
| TEAE | Treatment-emergent adverse event |
| TOEP | Toeplitz matrix |
| TRAE | Treatment-related treatment-emergent adverse event |
| TSH | Thyroid-stimulating hormone |
| WHO Drug | World Health Organization Drug Dictionary |

Version History

| Version | Date | Description of change |
| --- | --- | --- |
| 1.0 | 2023-11-17 | Original document |
| 2.0 | 2024-07-16 | The main revisions include: updating the definition of TEAE in the open-label treatment period, updating the Chinese description and version of MedDRA and the Chinese description of PN, supplementing the secondary estimand 2 and the subgroup analysis of the changes in 2-hour postprandial plasma glucose from baseline after 24 weeks of treatment, adding statistical analysis of “the proportion of subjects with HbA1c <5.7% after 24 weeks of treatment”, “the proportion of subjects with HbA1c <5.7% after 52 weeks of treatment”, “the proportion of subjects with HbA1c <7.0%, no severe hypoglycemia and no weight gain after 52 weeks of treatment” and “the change in BMI from baseline after 24 weeks and 52 weeks of treatment”, etc. |

# Introduction

This Statistical Analysis Plan (SAP) is based on the study protocol titled “A Multi-Center, Randomized, Double-Blind, Placebo-Controlled Phase III Clinical Study of XW003 Injection in Adult Type 2 Diabetes Mellitus Patients with Poor Glycemic Control After Nutrition and Exercise Interventions (EECOH-1)” (protocol No.: SCW0502-1031, version: 2.0, version date: December 13, 2022) and the corresponding electronic case report form (eCRF) (version: 3.0, version date: February 23, 2023). It is jointly formulated by statisticians, principal investigator and the sponsor.

This SAP describes the statistical analysis method for the efficacy and safety data of clinical study SCW0502-1031, and provides the chart template for data presentation in clinical study report (CSR). SAP version 1.0 has been finalized and approved before the database lock (DBL) in the core treatment period (November 17, 2023), and SAP version 2.0 will be finalized and approved before the final database lock (DBL) in the open-label treatment period.

# Study Overview

## Study Objectives, Endpoints and Estimands

### Study Objectives

**Primary Objective:**

- To evaluate the efficacy of XW003 Injection administered for 24 weeks in adult subjects with T2DM.

**Secondary Objectives:**

- To evaluate the efficacy of XW003 Injection administered for 52 weeks in adult subjects with T2DM;
- To evaluate the safety of XW003 Injection administered for 24 weeks and 52 weeks in adult subjects with T2DM;
- To evaluate the population pharmacokinetics of XW003 Injection administered in adult subjects with T2DM;
- To evaluate the immunogenicity of XW003 Injection administered in adult subjects with T2DM.

### Study Endpoints

**Primary Efficacy Endpoint:**

- Change from baseline in HbA1c as measured by the central laboratory after 24 weeks of treatment.

**Secondary Efficacy Endpoints:**

- Change from baseline in HbA1c as measured by the central laboratory at each of the other visits;
- Proportion of subjects with HbA1c <7% and HbA1c ≤6.5% after 24 and 52 weeks of treatment;
- Proportion of subjects with HbA1c <7%, no severe hypoglycemia and no weight gain after 24 weeks of treatment;
- Changes from baseline in FPG, fasting insulin, 2-hour postprandial plasma glucose, 7-point plasma glucose, homeostatic model assessment of insulin resistance (HOMA-IR), and homeostatic model assessment of β-cell function (HOMA-β) after 24 and 52 weeks of treatment;
- Change from baseline in lipids (triglycerides [TG], low-density lipoprotein [LDL], and high-density lipoprotein [HDL]) after 24 and 52 weeks of treatment;
- Change from baseline in weight, waist circumference, and hip circumference after 24 and 52 weeks of treatment.

**Safety endpoints:**

- Adverse events (AEs), including treatment-emergent adverse events (TEAEs) and serious adverse events (SAEs), and adverse events of special interest (AESIs, including hypoglycemia, cardiovascular effects, gastrointestinal effects, pancreatitis, and gallbladder-related diseases);
- Vital signs (sitting blood pressure [systolic and diastolic], pulse, body temperature), physical examination, 12-lead ECG;
- Clinical laboratory tests (hematology, urinalysis, blood biochemistry, coagulation function, thyroid function panel [TSH/FT3/FT4], calcitonin).

**Pharmacokinetic endpoints:**

- Ctrough: Plasma XW003 concentration before first dose (D1), on D29, D57, D85, D168, D197 (placebo group only), D225 (placebo group only), D253 (placebo group only), before dosing on D364, and on D399 at the end-of-study follow-up.

**Immunogenicity endpoints:**

- The immunogenicity of multiple doses of XW003 Injection will be investigated based on the formation of anti-XW003 serum antibodies pre-dose (D1) and at different time points post-dose (D85, D168, D253 [for placebo group only], D399). Positive samples will be further characterized for all *in vitro* neutralizing activity and cross-reaction to endogenous GLP-1.

### Estimands

**Primary estimand:**

The primary clinical focus of interest in this study is the inter-group difference of mean change from baseline in HbA1c in each test group versus the placebo group after 24 weeks of weekly treatment with XW003 Injection (0.6 mg or 1.2 mg) or placebo in adult patients with T2DM who do not achieve the desired level of control after 8 weeks of nutrition and exercise interventions, regardless of early termination of treatment or rescue therapy.

The specific definition of the primary estimand is as follows:

- **Population:**

All patients with T2DM who are randomized and treated with XW003 Injection or placebo for at least once.

- **Treatment:**

Subjects enrolled and randomized will be sequentially treated with 24 weeks of double-blind treatment and 28 weeks of open-label treatment. Specifically, subjects randomly assigned to the 0.6 mg or 1.2 mg XW003 Injection group will be administered according to their respective dose titration schedules, once weekly for a planned treatment period of 52 weeks; whereas subjects randomly assigned to the 0.6 mg or 1.2 mg placebo group will be administered according to their respective matching volumes once weekly, and after the 24-week double-blind treatment, they will be switched to the corresponding 0.6 mg or 1.2 mg XW003 Injection group to receive the 28-week open-label treatment, as detailed in Section 11 of the study protocol.

Hypoglycemic therapy, weight-reducing therapy, and systemic glucocorticoid/growth hormone therapy other than the rescue therapy are not permitted during the treatment period. Regardless of whether there is early termination of treatment or rescue therapy (Subjects who receive rescue therapy during the double-blind core treatment period will be discontinued from study drug upon completion of the double-blind core treatment, and the study is completed after a 5-week safety follow-up period after the last dose. Subjects treated with rescue therapy during the open-label treatment period should continue to attend the visits as specified in the protocol until completion of the clinical study), the subjects should be followed up until the end of the safety follow-up period.

- **Variable:**

Change from baseline in HbA1c after 24 weeks of treatment as measured by the central laboratory (post-treatment value - baseline value).

- **Intercurrent events and processing strategies:**

It is anticipated that the following intercurrent events may occur during the course of the study, and their definitions and processing strategies are described below:

| **Intercurrent event** | **Strategy** | **Rational or consideration** |
| --- | --- | --- |
| 1. Early termination of treatment for any reason | **Treatment policy strategy**  Continue the follow-up after early termination of treatment and include the data in the analysis | Compliant with clinical practice. This study focuses on the treatment effects regardless of whether the treatment is terminated early or not. |
| 1. Rescue therapy | **Treatment policy strategy**  Continue the follow-up after the rescue therapy and include the data in the analysis | Compliant with clinical practice. This study focuses on the treatment effects of study drug + rescue therapy |

- **Population-level summary:**

Mean change from baseline in HbA1c as measured by the central laboratory after 24 weeks of treatment for each treatment group and its 95% confidence interval (CI); the inter-group difference of the mean values in each XW003 dose group versus the placebo group and its two-sided 95% CI.

**Secondary estimand 1:**

This study also focuses on the inter-group difference of mean change from baseline in HbA1c in each test group versus the placebo group after 24 weeks of weekly treatment with XW003 Injection (0.6 mg or 1.2 mg) or placebo in adult patients with T2DM without any rescue therapy. For the intercurrent event (rescue therapy), the hypothetical strategy will be adopted, and the data after the occurrence of intercurrent events will not be included in the analysis. In statistical analysis, it’s assumed that the subjects receiving rescue therapy are similar to the subjects with similar baseline characteristics in the same treatment group without rescue therapy, and the HbA1c level after rescue therapy will be predicted according to the data of the latter subjects, and then included in the analysis. Other attributes are consistent with those of the primary estimand.

**Secondary estimand 2:**

As a supportive analysis for the primary estimand, the secondary estimand 2 in this study is established with the change from baseline in FPG after 24 weeks of treatment, the change from baseline in weight after 24 weeks of treatment, and the percent changes as the target variables. The population, treatment attributes, and processing strategies for intercurrent events of this estimand are the same as those of the primary estimand, only the target variables and the estimates in the population-level summary are replaced with the corresponding change from baseline in FPG or body weight after 24 weeks.

## Study Design

This study is a multi-center, randomized, double-blind, placebo-controlled Phase III clinical study, which aims at evaluating the efficacy, safety and immunogenicity of XW003 Injection in adult type 2 diabetes mellitus subjects with poor glycemic control after nutrition and exercise interventions.

A total of 210 subjects are planned to be enrolled, and those who meet the inclusion criteria and do not meet the exclusion criteria will be stratified by baseline glycosylated hemoglobin (HbA1c) (≤8.5% and >8.5%) and randomly assigned (2:2:1:1) to the following groups: the 1.2 mg dose group of XW003 Injection (N=70), the 0.6 mg dose group of XW003 Injection (N=70), the 1.2 mg XW003 volume-matching placebo group (N=35) and the 0.6 mg XW003 volume-matching placebo group (N=35); the two placebo control groups will be pooled for statistical analyses (N=70).

The study process consists of a 2-week screening period, a 4-week run-in period, a 24-week double-blind core treatment period, a 28-week open-label treatment period and a 5-week safety follow-up period, that is, a total of 63 weeks. The study design is detailed in Figure 1.

Dose titration Wk1~8

Dose titration Wk1~4

Dose titration Wk25~32

Dose titration Wk25~28

Placebo

Placebo

Placebo

Placebo

Screening period

Wk-6~-5

Run-in period

Wk-4~-1

Double-blind core treatment period

Wk1~24

Primary efficacy endpoints

@24wk

Open-label treatment period

Wk25~52

Safety follow-up period

Wk53-57

**Figure 1: Schematic Diagram of Study Design**

## Estimation of Sample Size

Assuming that the expected effect difference (ETD) of HbA1c between the XW003-1.2 mg or 0.6 mg test group and the placebo group is -1.2%, the standard deviation (SD) is 1.1%, the significance level α is 2.5% (one-sided), the power (1-β) is 90% and subjects are randomly assigned to XW003-1.2 mg, 0.6 mg test groups and pooled placebo group at a ratio of 1:1:1, at least 53 subjects required to be enrolled in each group as calculated by the PASS software. Given a dropout rate of approx. 20%, it is planned to enroll 70 subjects in each group, with an overall sample size of 210 subjects.

## Hypothesis Testing and Multiplicity

This is a pivotal study to evaluate the efficacy and safety of XW003 Injection, with the primary efficacy endpoint of changes in HbA1c after 24 weeks of treatment from the baseline. The statistical hypotheses are as follows:

- Null hypothesis H0:
- Alternative hypothesis H1:

Where is the overall average change in HbA1c after 24 weeks of treatment with 1.2 mg or 0.6 mg from baseline in the XW003 test group, is the overall average change in average HbA1c after 24 weeks of administration from baseline in the combined placebo group, and δ is the superiority margin, which is taken as -0.5% in this study.

This study contains XW003-1.2 mg and XW003-0.6 mg test groups. Hypothesis testing will be performed on the two test groups separately based on the estimands, controlling for overall type I error of no more than 0.025 (one-sided) by the sequential test method, i.e., the difference between the 1.2 mg test group and the placebo group will be tested first, and if the H0 is rejected, the test will continue to be performed between the 0.6 mg test group and the placebo group, otherwise the test will be stopped. The nominal significance level of each test is 0.025 (one-sided), and H0 could be rejected if the test p <0.025 (one-sided) or the upper limit of the two-sided 95% confidence interval for the inter-group difference (-) < .

## Randomization

The randomization scheme will be prepared by the randomization statistician using the SAS 9.4 statistical software package (or higher version). The stratified randomization method is used with HbA1c level (≤8.5%, >8.5%) as the stratification factor, and sufficient randomization processing numbers are generated at one time. The seed number and randomization procedure for generating the randomization scheme will be stored together with the randomization scheme in sealed package.

In this study, the central randomization system will be used for subject randomization and drug dispensing management. The final randomization scheme will be loaded into the central randomization system, which will be configured and go live before the study is initiated.

After the informed consent is documented, a unique screening number will be assigned to each subject. Subjects will be reviewed for eligibility at screening and after the run-in period and will be assigned a randomization number before the first dose after deemed eligible for enrollment. The format for screening numbers is S##-xxx, where ## represents the site number, and xxx represents a three-digit number starting from 001. For example, S01-001 represents the first subject screened at Site 01. Upon the completion of all screening assessments to determine whether the subjects meet the inclusion criteria and do not meet the exclusion criteria, the eligible subjects will be given a randomization number. The format of randomization numbers is as follows: C1xxx, the first digit is capital letter C, the second digit is the cohort, 1 represents the first cohort (1.2 mg of XW003 Injection or matching volume of placebo), 2 represents the second cohort (0.6 mg of XW003 Injection or matching volume of placebo), and xxx represents three-digit randomization code. For randomized subjects who exit or are withdrawn from the clinical study due to any reason, their randomization number will be retained regardless of the use of the study drug, and they will not be allowed to enter the study again.

Subjects who exit from the study for any reason without completing all necessary screening assessments will be considered screen failures. Subjects who fail screening will not be assigned with the randomization number. Subjects who do not receive a randomization number may be re-screened, but will be required to re-sign the informed consent form and undergo all screening procedures.

# Analysis Population

The specific definition of analysis population in this study is as follows:

| **Analysis Population** | **Definition and Description** |
| --- | --- |
| Full analysis set (FAS) | Consistent with the population definition in the primary estimand, i.e., all subjects randomized who have received at least one dose of study drug will be included in the FAS population. Subjects will be grouped based on the treatment they are assigned to receive (XW003 Injection or placebo), rather than the treatment actually received. |
| Safety set (SS) | Including all subjects who have received at least one dose of study drug (XW003 injection or placebo) and have safety evaluation after medication. SS is mainly used for safety evaluation of drugs and is grouped according to the treatment actually received. |
| Per-protocol set (PPS) | Including all subjects without major protocol deviations affecting efficacy in the full analysis set. PPS is mainly used for supplementary analysis of estimands and efficacy endpoints. |
| Pharmacokinetic concentration set (PKCS) | Including all subjects who have at least one available post-dose pharmacokinetic concentration data. |
| Pharmacokinetic parameter set (PKPS) | Including all subjects who have at least one available post-dose pharmacokinetic parameter data. |

The division of the above-mentioned population will be confirmed after completing cleansing and review of study data and before the database lock, and decision on population division will be made. In addition, after database lock, the influence of real-world plasma concentration data on the analysis set division will be further evaluated, and the population division will be supplemented and updated if necessary.

In addition, in order to distinguish the analysis set for the core treatment period and the analysis set for open-label treatment period, the following analysis set is defined for the open-label treatment period:

| Full analysis set for open-label treatment period | Including all subjects in the FAS population who enter the open-label treatment period and receive at least one dose of study drug during the open-label treatment period. |
| --- | --- |
| Safety set for open-label treatment period | Including all subjects in the SS population who enter the open-label treatment period and receive at least one dose of study drug during the open-label treatment period. |

# Planned Analysis Time Point

When all randomized subjects complete the 24-week double-blind core treatment period (i.e., V6 visit), the data of each subject during the 24-week double-blind core treatment period will be entered and cleaned, a data review meeting will be held, the database lock and data unblinding will be performed, and the first statistical analysis will be performed. The specific data cut-off date and database lock date are shown in the final clinical report.

After all subjects complete 28 weeks of open-label treatment period, the database lock and the second statistical analysis will be performed. The specific data cut-off date and database lock date are shown in the final clinical report.

# Statistical Analysis Method

## General Principles

All statistical analyses will be completed using statistical software SAS 9.4 or above, and the analysis process will be fully programmed.

For continuous variables, descriptive statistics include the number of subjects, means, standard deviations, medians, lower quartiles (Q1), upper quartiles (Q3), minimum and maximum values. For categorical/rank variables, descriptive statistics include the number and percentage of subjects and/or number of events.

Inter-group comparison of quantitative indicators is performed using analysis of variance or rank sum test depending on the distribution of the data, categorical indicators are tested by chi-square test or Fisher’s exact test (if chi-square test is not applicable) and the rank data are tested by rank sum test or Mantel-Haenszel test.

If there are inspections or evaluations not performed, the data listing only presents the results of the completed inspections or evaluations. The data of unscheduled visits are only tabulated and will not be included in statistical summary. Unless otherwise specified, the listings will be sorted by treatment group, subject number, visit and parameters.

Unless otherwise specified, minimum and maximum values will be rounded to the same decimal place as the original data, means and medians to 1 more decimal place than the original data, standard deviations to 2 more decimal places than the original data, but all statistics will be rounded to not more than 3 decimal places. The percentages will be rounded to 1 decimal place. If the number of subjects is 0, the percentage will not be presented, the denominator for calculating the percentage is the total number of subjects in the corresponding group of the analysis population.

Unless otherwise specified, the p values will be rounded to 4 decimal places in the statistical test. If the p value is less than 0.0001, it is expressed as “P < 0.0001”. If the p value is greater than 0.9999, it is expressed as “P > 0.9999”. The confidence interval will be rounded to more 1 decimal place than the point estimate.

## Study Drug

As stated in the study protocol, the study drug refers to XW003 injection or placebo.

## Treatment Period

Unless otherwise specified, the core treatment period and the open-label treatment period will be divided based on the date of occurrence or evaluation and the date of randomization, the start date of first administration of the study drug in the core treatment period and the open-label treatment period, the date of Week-24 data unblinding and the name of Week-24 visit (if necessary) through comparison.

- Efficacy analysis:
  - Core treatment period: The start date of the event or evaluation is later than or equal to the start date of randomization, and earlier than or equal to the date of Week-24 data unblinding or the name of Week-24 visit (if the subject does not enter the open-label treatment period, it is only necessary to satisfy the condition that the start date of occurrence is later than or equal to the start date of randomization).
  - Open-label treatment period: The start date of the event or evaluation is later than the date of Week-24 data unblinding and the name of Week-24 visit (for subjects entering the open-label treatment period).
- Safety analysis:
  - Core treatment period: The start date of the event or evaluation is later than or equal to the start date of first administration of the study drug in the core treatment period, and earlier than or equal to the date of Week-24 data unblinding or the name of Week-24 visit (if the subject does not enter the open-label treatment period, it is only necessary to satisfy the condition that the start date of occurrence is later than or equal to the start date of first administration of the study drug in the core treatment period).
  - Open-label treatment period: The start date of the event or evaluation is later than the date of Week-24 data unblinding and the name of Week-24 visit (for subjects entering the open-label treatment period).

Unless otherwise specified, the core treatment period will be summarized by treatment groups (1.2 mg XW003 injection group, 0.6 mg XW003 injection group and placebo group), the open-label treatment period will be summarized by treatment groups (placebo to 1.2 mg XW003 injection group, continuous 1.2 mg XW003 injection group, placebo to 0.6 mg XW003 injection group, and continuous 0.6 mg XW003 injection group), and all the treatment periods will be summarized by treatment groups (placebo to 1.2 mg XW003 injection group, continuous 1.2 mg XW003 injection group, placebo to 0.6 mg XW003 injection group, and continuous 0.6 mg XW003 injection group).

## Definition of Baseline

In this study, two baselines including the core treatment period baseline and the open-label treatment period baseline will be set up.

- Efficacy analysis:
- The core treatment period baseline is defined as the last non-missing measurement prior to randomization.
- The open-label treatment period baseline is defined as the last non-missing measurement prior to first administration of the study drug in the open-label treatment period.
- Safety analysis:
- The core treatment period baseline is defined as the last non-missing measurement prior to first administration of the study drug in the core treatment period.
- The open-label treatment period baseline is defined as the last non-missing measurement prior to first administration of the study drug in the open-label treatment period.

Change from baseline = measured value obtained at scheduled visit time point - baseline value

Percent change from baseline = (measured value obtained at scheduled visit time point - baseline value)/baseline value * 100%

Unless otherwise specified, when the change/percentage change from baseline is calculated, the core treatment period baseline will be selected for calculation for the events or assessments in the core treatment period, the core treatment period baseline and the open-label treatment period baseline will be selected respectively for calculation for the events or assessments in the open-label treatment period, and the core treatment period baseline will be selected for calculation for all events or assessments in the treatment period.

## Handling of Missing Data

The main purpose of data imputation is to handle missing data when summarizing by tables, not to impute the original data. In data lists, the original collected data will be listed.

### Handling of Missing Efficacy Data

For the handling of missing data related to the primary efficacy endpoints and estimands, please refer to “5.9.1. Primary estimands” for details.

For secondary efficacy endpoints, statistical analyses will be based on available observed data only and no imputation of missing data will be done.

### Handling of Missing Safety Data

If laboratory test values recorded as lower than (and equal to) or higher than (and equal to) the test range value (for example, < x, ≤ x, > x, ≥ x), they will be treated as the test range value when summarizing the descriptive statistics, but in the data lists, they will still be listed as the CRF record results, i.e., “< x”, “≤ x”, “> x” or “≥ x”.

For missing dates of adverse events, prior/concomitant medications and prior/concomitant non-drug therapies, if not specifically explained, the missing date will be imputed according to the following methods before making a judgment:

- The missing date of adverse events will be imputed as follows:
- The start date of AE is missing

1. If the year and month are known and are not equal to the year and month in which the investigational drug is first administered in the core treatment period, impute with the first day of the known month;
2. If the year and month are known and are equal to the year and month in which the investigational drug is first administered in the core treatment period, then make the start date of the AE equal to the date of the first administration of the investigational drug (the date means “MM/DD”);
3. If only the year is known and the year is not equal to the year in which the investigational drug is first administered in the core treatment period, impute with “January 1st”;
4. If only the year is known and is equal to the year in which the investigational drug is first administered in the core treatment period, then make the start date of the AE equal to the date of the first administration of the investigational drug (the date means “MM/DD”);
5. If year, month, and day are missing, the date on which the investigational drug is first administered in the core treatment period shall be used as the corresponding start date;
6. If the imputed start date is later than the end date, the end date shall be used as the corresponding start date.

- The end date of AE is missing

1. If the year and month are known, impute with the last day of the known month;
2. If only the year is known, impute with “December 31st”.
3. If the year, month and day are missing, the date will not be imputed;
4. If the imputed end date is later than the data cutoff date/death date (if any), the data cutoff date/death date shall be regarded as the corresponding end date.

- The missing dates of prior/concomitant medications and prior/concomitant non-drug therapies are imputed as follows:
- The start dates of prior/concomitant medications and prior/concomitant non-drug therapies are missing

1. If the year and month are known, impute with the first day of the known month.
2. If only the year is known, impute with “January 1st” of the known year;
3. If the year, month, and day are missing, use the day before the first medication date of the core treatment period as the start date.

- The end dates of prior/concomitant medications and prior/concomitant non-drug therapies are missing

1. If the year and month are known, impute with the last day of the known month;
2. If only the year is known, impute with “December 31st” of the known year;
3. If the year, month and day are missing, use the start date as the end date when the answer to “Yes/No” in the CRF is not “Yes”; use the data cutoff date/death date (if any) as the end date when the answer to “Yes/No” is “Yes”;
4. If the imputed end date is later than the data cutoff date/death date (if any), the data cutoff date/death date shall be regarded as the corresponding end date.

### Handling of Other Missing Data

Imputation of date of diabetes mellitus: If the year is missing, the diagnosis date is missing; if the month and day are missing, impute with “January 1st”; if the day is missing, impute with “01”.

## Subject Disposition

The number and percentage of the following subjects will be summarized, including the subjects who are screened, not randomized (screening failure in the screening period/before run-in/in the run-in period/before randomization) with reasons, randomized, receive at least one dose of study drug, complete the core treatment period/open-label treatment period, complete the study for the core treatment period/the study for the open-label treatment period, complete the trial and withdraw early with reasons. For non-randomized subjects (screening failure in the screening period/before run-in/in the run-in period/before randomization) with reasons, the denominator in calculating the percentage is defined as the total number of screened subjects, and the denominator in calculating other percentages is the number of randomized subjects in corresponding treatment groups.

The full analysis set, safety set, per-protocol set, pharmacokinetic concentration set and pharmacokinetic parameter set of each treatment group, and the number and percentage of subjects not included in each data set will be summarized. The denominator in calculating the percentages is the number of randomized subjects in corresponding treatment groups.

The main reasons for which the subjects are not randomized (screening failure in the screening period/before run-in/in the run-in period/before randomization) and the main reasons for withdrawal from the study will be listed.

## Protocol Deviation

Based on all randomized subjects, the number and percentage of subjects with various major and minor protocol deviations will be summarized by treatment group and total number of subjects (based on the core treatment period and open-label treatment period), and all subjects with protocol deviations will also be listed.

## Subject Information

### Demographics and Baseline Characteristics

Based on the FAS population, demographic and baseline characteristics will be summarized by treatment group and total number of subjects (based on the core treatment period and open-label treatment period). If applicable, all missing data will be summarized as missing category. Demographics and baseline characteristics of subjects will also be listed.

| **Continuous variables** | **Categorical variable** |
| --- | --- |
| Age (years) | Age group (<65 years old, ≥65 years old) |
| Height (cm) | Gender (male vs. female) |
| Weight (kg) | Ethnic group (Han ethnicity, others) |
| BMI (kg/m2) | History of alcohol use (Yes, No) |
| Waist circumference (cm) | Drinking more than 14 units of alcohol per week in the past (Yes, No) |
| Hip circumference (cm) | History of drug abuse (Yes, No) |
| Glycosylated hemoglobin (%) | History of allergy (Yes, No) |
| Fasting plasma glucose (mmol/L) | Baseline glycosylated hemoglobin (≤8.5%, >8.5%) |
| Glomerular filtration rate (mL/min/1.73 m2) | Baseline glomerular filtration rate (<60 mL/min/1.73 m2, ≥60 mL/min/1.73 m2) |
| Course of diabetes (Year) | BMI group (<24 kg/m2, 24~28 kg/m2, ≥28 kg/m2) |
|  | Prior use of any anti-diabetic drug (after diagnosis of subjects) |
|  | Use of any anti-diabetic drug within 12 weeks prior to screening |

Note: Age (years) = INT [(date of signing informed consent form- date of birth + 1)/365.25]

Course of diabetes (years) = (date of signing informed consent form - date of first diagnosis of diabetes + 1)/365.25] (rounded to 1 decimal place)

### Past/Concomitant Medical History and Surgical History

Past medical history is defined as the medical history with end date before the first administration in the core treatment period.

The concomitant medical history for the core treatment period is defined as the medical history not ended before the first administration in the core treatment period.

The concomitant medical history for the open-label treatment period is defined as the medical history not ended before the first administration in the open-label treatment period.

Past/concomitant medical history and surgical history will be coded using the latest version of Medical Dictionary for Regulatory Activities (MedDRA) [version 27.0 or higher] in the database.

Based on the FAS population, the past/concomitant medical history and surgical history will be summarized by the treatment group and total number of subjects, as follows:

- The number and percentage of subjects with at least one record of past/concomitant medical history and surgical history will be summarized.
- The number and percentage of subjects will be summarized by system organ class (SOC) and preferred term (PT). The number and percentage of subjects will be arranged in descending order according to the total number of subjects in the 1.2 mg XW003 injection group in each SOC and PT, and in alphabetical order if the number of subjects is the same.

The past/concomitant medical history and surgical history of the subjects will be tabulated.

### Prior/Concomitant Treatments

#### Prior/Concomitant Medications

Prior medications will be defined as follows:

- Medication with end date earlier than the start date of first administration of the investigational product in the core treatment period.

Concomitant medications in the core treatment period will be defined as follows:

- Medication with start date earlier than the start date of first administration in the core treatment period, and with end date earlier than the start date of first administration of the study drug in the core treatment period.
- Medication with start date later than or equal to the start date of first administration of the study drug in the core treatment period, and earlier than or equal to the date of Week-24 data unblinding (if the subject does not enter the open-label treatment period, it is only necessary to satisfy the condition that the start date of medication is later than or equal to the start date of first administration of the study drug in the core treatment period).

Concomitant medications in the open-label treatment period will be defined as follows:

- Medication with start date earlier than or equal to the date of Week-24 data unblinding, and medication with end date later than the date of Week-24 data unblinding (for subjects entering the open-label treatment period).
- Medication with end date later than the date of Week-24 data unblinding (for subjects entering the open-label treatment period).

Prior/concomitant medications will be coded using the latest version of World Health Organization Drug Dictionary [B3, dated March 1, 2024 or later] in the database.

Based on the SS population, the prior/concomitant medications will be summarized by the treatment group and total number of subjects, as follows:

- The number and percentage of subjects with at least one prior/concomitant medication will be summarized.
- The number and percentage of subjects will be summarized by treatment subgroup (ATC Level 2) and preferred name (PN). The number and percentage of subjects will be arranged in descending order according to the total number of subjects in the 1.2 mg XW003 injection group in each ATC Level 2 and PT, and in alphabetical order if the number of subjects is the same.

The prior/concomitant medication of the subjects will be tabulated.

#### Prior/Concomitant Non-drug Therapies

The definition of prior/concomitant non-drug therapies is similar to that of prior/concomitant drug therapies, which is divided into prior non-drug therapy, non-drug therapy in the core treatment period and non-drug therapy in the open-label treatment period.

Prior/concomitant non-drug therapies will be coded using the latest version of Medical Dictionary for Regulatory Activities (MedDRA) [27.0 version or higher] in the database.

Based on the SS population, the prior/concomitant non-drug therapies will be summarized by the treatment group and total number of subjects, as follows:

- The number and percentage of subjects with at least one prior/concomitant non-drug therapy will be summarized.
- The number and percentage of subjects will be summarized by system organ class (SOC) and preferred term (PT). The number and percentage of subjects will be arranged in descending order according to the total number of subjects in the 1.2 mg XW003 injection group in each SOC and PT, and in alphabetical order if the number of subjects is the same.

The prior/concomitant non-drug therapies of the subjects will be tabulated.

### History of Diabetes Mellitus

Based on the FAS population, the history of diabetes mellitus will be summarized by the treatment group and total number of subjects. The subjects will be specifically summarized according to the following variables:

- Type 2 diabetes mellitus or not
- Course of diabetes (years) = (date of signing informed consent form - date of diagnosis of diabetes + 1)/365.25] (rounded to 1 decimal place)
- Prior use of any anti-diabetic drug (after diagnosis of subjects)
- Use of any anti-diabetic drug within 12 weeks prior to screening
- Control of plasma glucose by nutrition and exercise 8 months prior to screening
- Prior diagnosis with other types of diabetes mellitus
- Presence of serious chronic complications of diabetes mellitus within 6 months prior to screening
- Determined or suspected grade 3 hypoglycemia episodes within 6 months prior to screening, or 2 or more hypoglycemic events (plasma glucose < 3.9 mmol/L) within 1 month prior to screening
- Occurrence of hypoglycemic events

The details on the history of diabetes mellitus of the subjects will be tabulated.

### Drugs for Rescue Therapy

The drugs for rescue therapy will be coded using the latest version of World Health Organization Drug Dictionary [B3, dated March 1, 2024 or later] in the database.

Based on the SS population, the use of drugs for rescue therapy will be summarized by treatment group and total number of subjects (based on the core treatment period and open-label treatment period), as follows:

- The number and percentage of subjects with at least one drug for rescue therapy will be summarized.
- The number and percentage of subjects will be summarized by treatment subgroup (ATC Level 2) and preferred name (PN). The number and percentage of subjects will be arranged in descending order according to the total number of subjects in the 1.2 mg XW003 injection group in each ATC Level 2 and PT, and in alphabetical order if the number of subjects is the same.

The details of all drugs for rescue therapy for the subjects will be listed.

## Efficacy Analysis

### Primary Estimand

#### Definition of Primary Estimand

The primary clinical focus of interest in this study is the inter-group difference of mean change from baseline in HbA1c in each test group versus the placebo group after 24 weeks of weekly treatment with XW003 Injection (0.6 mg or 1.2 mg) or placebo in adult patients with T2DM who do not achieve the desired level of control after 8 weeks of nutrition and exercise interventions, regardless of whether there is early termination of treatment or rescue therapy. Refer to Section “2.1.3 Estimands” for the detailed definition of primary estimand.

#### Primary Statistical Analysis

##### Primary Analytical Methods

Based on FAS population, the Mixed Model for Repeated Measures (MMRM) is used as the primary analytical method, and the parameters of the model are estimated by restricted maximum likelihood (REML) method. The model takes the change in HbA1c from baseline at each visit after treatment as the dependent variable, and the baseline HbA1c level, scheduled visit time points, treatment group, interaction between scheduled visit time point and treatment group, and other necessary baseline characteristic factors (if applicable) as fixed effects. The unstructured (UN) covariance structure will be considered first for the model. If the model does not converge, other covariance structures such as Compound Symmetry, CS, TOEPlitz matrix (TOEP) and first-order auto-regression (AR (1)) will be considered until the non-convergence problem is addressed.

The model is used to obtain covariate-adjusted mean changes in HbA1c at week 24 from baseline in each group and their standard errors, 95% confidence intervals, as well as average inter-group difference between different dose groups of XW003 Injection and placebo control group, and its 95% confidence interval. If the upper limit of the interval is less than the superiority margin (-0.5%), it indicates that the corresponding dose group is superior to the placebo control group, otherwise it does not indicate that the dose group is superior to the placebo control group.

##### Handling of Intercurrent Events and Missing Data

For missing intermediate data caused by missed follow-up or data collection, multiple imputation will be performed based on MAR hypothesis.

The treatment policy strategy will be used for the intercurrent event of “A. Early termination of treatment for any reason”, and the subjects after early termination of treatment will continue to be followed up and be included in the primary analysis. For subjects whose HbA1c data at week 24 are not collected after termination of treatment, assuming that the efficacy is similar to that of the subjects in the same treatment group who terminate the treatment early and the primary endpoint is not missing. For the primary analysis, multiple imputation will be performed for missing data based on the Retrieved Dropout (RDO) data (that is, missing data will be imputed based on subjects who terminate treatment early and primary endpoint is not missing).

The treatment policy strategy will be used for the intercurrent event of “B. rescue therapy”, and the subjects after rescue therapy will continue to be followed up and be included in the primary analysis. For subjects whose HbA1c data at week 24 are not collected after termination of rescue therapy, the handling method is similar to that of the above intercurrent event of early termination of treatment, and for the primary analysis, multiple imputation will be performed for missing data based on the RDO data (that is, missing data will be imputed based on subjects who receive rescue therapy and the primary endpoint is not missing).

Proc MI of SAS 9.4 will be used for multiple imputation of missing data, and the multiple imputation analysis process is detailed below:

1. Based on the hypothesis of missing at random (MAR), Markov Chain Monte Carlo (MCMC) method will be used for multiple imputation of missing intermediate data to obtain monotonically missing data, and imputation will be carried out for each treatment group. The imputation model includes baseline HbA1c and HbA1c data at each visit, and 1000 times of imputation are planned to generate 1000 datasets.
2. For each dataset generated in step 1, it is divided into three data subsets:
   1. Subset 1: Including subjects who terminate treatment early (including concurrent rescue therapy);
   2. Subset 2: Including subjects who only receive rescue therapy;
   3. Subset 3: Including subjects who do not have any intercurrent events.
3. For each subset in step 2, the linear regression model is used to gradually impute the subset into a complete subset, and the treatment group, baseline HbA1c and HbA1c at each visit will be used as explanatory variables.
4. All complete subsets imputed in step 3 will be combined into a data set, that is, 1000 complete data sets without missing data will be obtained.
5. Each complete data set will be analyzed using the MMRM model. For details, please refer to Section “5.9.1.2.1 Primary analytical methods”.
6. The results of each analysis will be combined using the Rubin formula (Proc MIANALYZE of SAS 9.4).

If imputation cannot be performed in actual statistical analysis because the number of subjects with intercurrent events is too small or due to non-convergence of imputation model caused by other reasons, reduction in the number of visit variables in the imputation model will be considered or MAR hypothesis will be directly used to impute the missing data until the problems such as non-convergence are addressed.

The test results of the primary efficacy endpoint in the early-termination visit of the subjects will be derived according to the following rules, and will be included in the corresponding scheduled visit for statistical analysis:

| Days from randomization [1] | Visit |
| --- | --- |
| 29±3 | V2 |
| 57±3 | V3 |
| 85±3 | V4 |
| 113±3 | V5 |
| 168±3 | V6 |

Note: Days from randomization = test date of efficacy endpoint - date of randomization date + 1.

#### Sensitivity Analysis

**Sensitivity analysis 1:**

The analysis of covariance (ANCOVA) method will be used to analyze the change in HbA1c at Week 24 from baseline, taking the change in HbA1c at Week 24 from baseline as the dependent variable, and baseline HbA1c level and treatment group as the explanatory variables. The remaining analysis process is consistent with the primary statistical analysis.

**Sensitivity analysis 2:**

According to the following hypotheses, the Jump to Reference (J2R) method based on the data of the control group will be used to impute the missing data:

- The intermediate missing data of XW003 treatment group will be imputed based on the MAR hypothesis.
- The missing data of XW003 treatment group after the intercurrent event will be imputed based on the J2R method.
- The missing data of the control group will be imputed based on the MAR hypothesis.

“Five macros” will be used for imputation and analysis. For details, refer to:

<https://www.lshtm.ac.uk/research/centres-projects-groups/missing-data#dia-missing-data> in section: Imputation based approaches >> Reference based MI via Multivariate Normal RM (the “five macros” and MIWithD)) (See Carpenter et al (2013) for complete description.)

**Sensitivity analysis 3:**

Based on the same analysis process and method as the primary statistical analysis, the robustness of the primary statistical analysis results will be verified by two-way tipping point analysis, and a conclusion that it is contrary to the primary analysis will be made by exploring the change extent of imputed HbA1c data at Week 24 in XW003 treatment group and placebo group. If the tipping point appears, the situation under this particular tipping point hypothesis will be interpreted clinically. The specific analysis process is as follows:

1. The missing data are processed using the same multiple imputation method as the primary analysis;
2. For each complete data set, a separate offset coefficient δ (δ = -1.0% to 1.0% by 0.1%) will be added to imputed Week-24 HbA1c data of each treatment group;
3. Each complete data set is analyzed with the same MMRM model as the primary analysis;
4. The results of each analysis will be combined using the Rubin formula;
5. Steps 2~4 will be repeated in each treatment group with different combinations of offset coefficient δ.

#### Supplementary Analyses

The primary estimand will be analyzed based on the PPS population, and supplementary analysis will be performed with reference to Section “5.9.2 Secondary estimand 1”.

#### Subgroup Analysis

Based on the FAS population, an exploratory analysis will be conducted in the following subgroups using a method similar to the primary statistical analysis (the baseline HbA1c level will not be included in the explanatory variables for subgroup analysis model of baseline HbA1c level) (the subgroup category in which the model is not converged due to a very limited number of subjects will not be analyzed):

- Gender (male vs. female)
- Baseline HbA1c level (≤8.5% and >8.5%)
- Age (<65 years old, ≥65 years old)
- BMI (<24 kg/m2, 24~28 kg/m2, ≥28 kg/m2)
- Baseline glomerular filtration rate (<60 mL/min/1.73 m2, ≥60 mL/min/1.73 m2)

At the same time, the forest plot will be plotted to display the difference and 95% CI in efficacy between groups of each subgroup.

### Secondary Estimand 1

This study also focuses on the inter-group difference of mean change from baseline in HbA1c in each test group versus the placebo group after 24 weeks of weekly treatment with XW003 Injection (0.6 mg or 1.2 mg) or placebo in adult patients with T2DM without any rescue therapy. For intercurrent event B. Rescue therapy, the hypothetical strategy will be adopted, and the remaining attributes will be consistent with those of the primary estimand.

As a supplementary analysis of the primary estimand, the hypothetical strategy is adopted for the intercurrent event of “B. Rescue therapy”, and the data after the intercurrent event are not included in the analysis. In statistical analysis, it assumed that the subjects receiving rescue therapy are similar to the subjects without rescue therapy and having similar baseline characteristics in the same treatment group, and the HbA1c level after rescue therapy will be predicted according to the data of the latter subjects (based on the MAR hypothesis). Other analyses have the same primary analytical methods and strategies of the primary estimand (the subset in the step 2 of primary analysis needs to be divided into subjects who terminate treatment early and those who do not terminate treatment early).

### Secondary Estimand 2

The secondary estimand 2 in this study is established with the change from baseline in FPG after 24 weeks of treatment, the change from baseline in weight after 24 weeks of treatment, and the percent changes as the variables. The population, treatment attributes, and processing strategies for intercurrent events of this estimand are the same as those of the primary estimand, only the target variables and the estimates in the population-level summary are replaced with the corresponding change from baseline in FPG or body weight after 24 weeks.

As a supportive analysis for the primary estimand, the changes in FPG after 24 weeks of treatment from baseline, changes in body weight after 24 weeks of treatment from baseline and the percentage changes will be analyzed using primary analytical methods and handling strategies similar to those of the primary estimand. Subgroup analysis will also be performed for secondary estimand 2.

### Others Secondary Efficacy Endpoints

Secondary efficacy endpoints will be analyzed based on the FAS population and the PPS population. All secondary efficacy endpoints will be summarized and compared between groups, and secondary endpoints related to Week 52 will only be descriptively summarized. Statistical analyses of secondary efficacy endpoints will be based on available observed data only and no imputation of missing data will be done.

Secondary efficacy endpoints include:

- - Change from baseline in HbA1c as measured by the central laboratory at each of the other visits;
  - Proportion of subjects with HbA1c <7% and HbA1c ≤6.5% after 24 and 52 weeks of treatment;
  - Proportion of subjects with HbA1c <7%, no severe hypoglycemia and no weight gain after 24 weeks of treatment (No severe hypoglycemia is defined as the absence of grade 3 hypoglycemic events or plasma glucose <3.1 mmol/L with hypoglycemic symptoms described in Appendix 2 of the protocol during the 24-week treatment, and weight gain is defined as the change in body weight from baseline at Week-24 visit ≥0);
  - Changes from baseline in FPG, fasting insulin, 2-hour postprandial plasma glucose, 7-point plasma glucose, homeostatic model assessment of insulin resistance (HOMA-IR), and homeostatic model assessment of β-cell function (HOMA-β) after 24 and 52 weeks of treatment;
  - Change from baseline in lipids (triglycerides [TG], low-density lipoprotein [LDL], and high-density lipoprotein [HDL]) after 24 and 52 weeks of treatment;
  - Change from baseline in weight, waist circumference, and hip circumference after 24 and 52 weeks of treatment.

Among them, the 7-point plasma glucose will be statistically analyzed according to the following indicators: the arithmetic mean of 7-point plasma glucose level, the standard deviation of 7-point plasma glucose level, the postprandial plasma glucose excursion (that is, the average value of the absolute difference between the plasma glucose 2 hours after three meals and its corresponding preprandial plasma glucose), and the largest amplitude of glycemic excursions (that is, the difference between the maximum and minimum 7-point plasma glucose values).

Calculation formulas of HOMA-IR and HOMA-β:

HOMA-IR = fasting plasma glucose (mmol/L) × fasting insulin (μU/mL)/22.5

HOMA-β = 20 × fasting insulin (μU/)/(fasting plasma glucose (mmol/L) - 3.5)

For continuous endpoints, the analysis method similar to the primary efficacy endpoint will be adopted, and the average inter-group difference and its 95% CI of the change in each endpoint from baseline will be calculated based on MMRM or ANCOVA model (all continuous endpoints other than FPG, weight, waist circumference and hip circumference will be calculated using the ANCOVA model). The data for each endpoint at each scheduled visit and the change at each scheduled visit from baseline will be summarized by treatment group (based on the core treatment period, the open-label treatment period and all treatment periods). For HbA1c, FPG, fasting insulin, 2-hour postprandial plasma glucose, 7-point plasma glucose, HOMA-IR, HOMA-β, blood lipid, weight, waist circumference and hip circumference measured by the central laboratory, line charts will be used to display the diachronic changes of the primary descriptive statistics.

For categorical endpoints, the rate point estimates and its 95%CI (Clopper-Pearson exact method) of each treatment group will be calculated, and the missing data will be treated as subjects without response. Logistic regression model will be used to compare the rates between groups. By taking the baseline HbA1c level and treatment groups as explanatory variables, the corrected odds ratio (OR) between groups and its 95% CI will be calculated.

The changes in 2-hour postprandial plasma glucose from baseline after 24 weeks of treatment will also be analyzed in subgroups.

## Safety Analyses

The exposure of study drug will be based on the FAS population, and the remaining safety analyses will be based on the SS population. All safety analyses will be summarized based on the core treatment period and the open-label treatment period. The core treatment period will be summarized by treatment groups (1.2 mg XW003 injection group, 0.6 mg XW003 injection group and placebo group), the open-label treatment period will be summarized by treatment groups (placebo to 1.2 mg XW003 injection group, continuous 1.2 mg XW003 injection group, placebo to 0.6 mg XW003 injection group, and continuous 0.6 mg XW003 injection group), and all the treatment periods will be summarized by treatment groups (placebo to 1.2 mg XW003 injection group, continuous 1.2 mg XW003 injection group, placebo to 0.6 mg XW003 injection group, and continuous 0.6 mg XW003 injection group). Meanwhile, the adverse events will also be summarized according to the number of cases in each test group and the total number of cases.

### Exposure to and Compliance with Study Drug

The days of treatment, weeks of treatment, total number of injections, average days between two injections, total drug exposure, actual dose intensity, relative dose intensity, compliance and its category (<80%, 80%-120%, >120%) will be summarized according to the treatment group.

- - Days of treatment= Last injection date - First injection date + 7;
  - Weeks of treatment = Days of treatment/7;
  - Average days between two injections = (Last injection date - First injection date)/(Total number of injections - 1);
  - Total drug exposure (mg) = Σ[Each actual dose (mg)];
  - Actual dose intensity (mg/week) = Σ[Each actual dose (mg)]/weeks of treatment;
  - Relative dose intensity (%) = Actual dose intensity (mg/week)/Planned dose intensity (mg/week) *100%, in which the planned dose intensity (mg/week) is the average of planned doses at all visits specified in the protocol;
  - Compliance (%) = Σ[Each actual dosage (mg)]/Σ[Each planned dose (mg)] * 100%;
  - Compliance of doses (%) = Actual prescribed doses/Planned doses * 100%, and the actual prescribed doses is the actual doses plus the missed doses due to adverse events.

The dosage (mL) of placebo group will participate in the calculation of the above related parameters.

The cumulative and average exposure person-years of the investigational drug (XW003 injection) will be summarized for all treatment periods:

- Cumulative exposure person-years = Σ[(Last injection date - First injection date + 7 - Number of drug interruptions * 7) per subject]/365.25
- Average exposure person-years = Cumulative exposure person-years/Number of subjects in the applicable group

All study drug dosing records, drug exposure and compliance of the subjects will be listed.

### Adverse Event

All adverse events (AEs) will be coded using the latest version of Medical Dictionary of Regulatory Activities (MedDRA) [version 27.0 or higher] in the database, and the severity of AEs will be evaluated according to the National Cancer Institute - Common Terminology Criteria for Adverse Events (NCI-CTCAE, version 5.0). If the severity of any AE is missing, it will be included in the AEs with severity ≥ Grade 3 for summary.

Treatment-emergent adverse events (TEAEs) are defined as AEs occurring or worsening from the first use of the study drug (XW003 Injection or placebo) during the core treatment period to the last visit during the safety follow-up period.

- - TEAEs in the core treatment period are defined as AEs with the start date of occurrence or severity worsening later than or equal to the start date of first administration of the study drug in the core treatment period, and earlier than or equal to the date of Week-24 data unblinding (if the subject does not enter the open-label treatment period, it is only necessary to satisfy the condition that the start date of occurrence or severity worsening is later than or equal to the start date of first administration of the study drug in the core treatment period).
  - TEAEs in the open-label treatment period are defined as AEs with the start date of occurrence or severity worsening (severity worsening is applicable to AEs that occur before the first administration in the core treatment period, and worsening refers to the worsening of the maximum severity of the AE before the date of Week-24 data unblinding) later than the date of Week-24 data unblinding (for subjects entering the open-label treatment period).

Treatment-related adverse events (TRAEs) are defined as AEs which are judged to be “definitely related”, “probably related”, “possibly related” to the study drug, or for which the relationship is judged to be missing.

A serious adverse event (SAE) is defined as any untoward medical event that results in death, is life-threatening, results in persistent or significant disability or incapacity, requires inpatient hospitalization or prolongation of existing hospitalization, or results in a congenital anomaly or birth defect following the administration of the study drug.

Adverse events of special interest (AESIs) are defined as hypoglycemia, cardiovascular effects, gastrointestinal effects, pancreatitis, gallbladder related diseases, etc.

Severe hypoglycemia is defined as Grade 3 hypoglycemia, i.e. no specific plasma glucose boundary, accompanied by consciousness and/or physical changes, requiring assistance of another person, or plasma glucose <3.1 mmol/L accompanied by hypoglycemic symptoms.

Unless otherwise specified, only treatment-emergent adverse events will be summarized. The number of cases and the number and percentage of subjects will be summarized for the following TEAEs by treatment group. Meanwhile, the following TEAEs will be summarized by system organ class (SOC)/AESI class and preferred term (PT). The number and percentage of subjects will be arranged in descending order according to the total number of subjects in the 1.2 mg XW003 injection group in each SOC/AESI class and PT, and in alphabetical order if the number of subjects is the same. In addition, all TEAEs will also be summarized by severity and the correlation with the study drug, and the number of the same specific adverse events will be summarized by the maximum severity and the most correlation:

- All TEAEs
- CTCAE Grade ≥ 3 TEAEs
- TEAEs leading to dose reduction of study drug
- TEAEs leading to dose suspension of study drug followed by resumption
- TEAEs leading to dose suspension of study drug
- TEAEs leading to discontinuation of study drug
- TEAEs leading to death
- TEAEs leading to withdrawal
- TRAE
- CTCAE Grade ≥ 3 TRAEs
- TRAEs leading to dose reduction of study drug
- TRAEs leading to dose suspension of study drug followed by resumption
- TRAEs leading to dose suspension of study drug
- TRAEs leading to discontinuation of study drug
- TRAEs leading to death
- TRAEs leading to withdrawal
- TESAE
- TRSAE
- TEAEs of special interest
- TRAEs of special interest
- TEAE of hypoglycemia (plasma glucose <3.9 mmol/L)
- TRAE of hypoglycemia (plasma glucose <3.9 mmol/L)
- TEAE of hypoglycemia (plasma glucose <3.0 mmol/L)
- TRAE of hypoglycemia (plasma glucose <3.0 mmol/L)
- TEAE of severe hypoglycemia
- TRAE of severe hypoglycemia

The severity of hypoglycemic events, the correlation with the study drug and leading to withdrawal from the trial or not will be summarized by treatment group. Meanwhile, all adverse events will also be summarized by treatment group.

The changes in the incidence of nausea, vomiting, diarrhea, decreased appetite and gastrointestinal diseases with the observation time (week) will be plotted by line charts.

The details of all adverse events, serious adverse events, adverse events leading to dose reduction of the study drug, adverse events leading to dose suspension of the study drug followed by resumption, adverse events leading to dose suspension of the study drug, adverse events leading to discontinuation of the study drug, adverse events leading to death, adverse events leading to withdrawal from the trial, adverse events of special interest and adverse events of hypoglycemia will be listed for all subjects. All adverse events occurring during the study will be listed.

### Laboratory Tests

The data of laboratory test items (including hematology, urinalysis, blood biochemistry, coagulation function, thyroid function panel and calcitonin) at each scheduled visit and their changes from baseline will be summarized by treatment group, and the changes in the clinical significance assessment of laboratory test items at baseline and each scheduled visit after baseline will be summarized by treatment group using shift tables. Meanwhile, all laboratory test results of the subjects will be listed.

### 12-lead ECG

The data of ECG examination items (including heart rate, QT interval, QRS interval, PR interval, RR interval and system-derived QTcF) of the subjects at each scheduled visit and their changes from baseline will be summarized by treatment group. Meanwhile, all ECG examination results of the subjects will be listed.

The number and percentage of subjects whose baseline QTcF and the maximum QTcF after baseline (including data at all visits) meet the following categories will be summarized by treatment group:

- QTcF values: ≤450 ms, 450 ms~480 ms, 480 ms~500 ms, >500 ms.
- Increase in QTcF from baseline: ≤30 ms, 30 ms~60 ms, 60 ms~90 ms, >90 ms.

### Vital Signs

The data of measured vital sign items (including blood pressure [systolic and diastolic], pulse rate and temperature) of the subjects at each scheduled visit and their changes from baseline will be summarized by treatment group. Meanwhile, all vital sign measurement results of the subjects will be listed.

### Physical Examination

The data of examined sites (including mucocutaneous, lymph nodes, head, neck, chest, abdomen, spine and limbs, and others) at each scheduled visit and their changes from baseline will be summarized by treatment group. Meanwhile, all physical examination results of the subjects will be listed.

### Plasma Glucose Monitoring

All self-monitored plasma glucose results of the subjects will be listed.

### Viral Serology

All viral serology results of the subjects will be listed.

## Pharmacokinetic Analysis

### Pharmacokinetic Endpoints

The PK measurement analyzed is the trough concentration Ctrough within the dosing interval: plasma XW003 concentration before first dose (D1), on D29, D57, D85, D168, D197 (placebo group only), D225 (placebo group only), D253 (placebo group only), before dosing on D364, and D399 at the end-of-study follow-up.

### Plasma Concentration and Plasma Concentration-Time Curve

Based on the PKCS, the plasma concentration of XW003 will be listed and descriptively and statistically analyzed according to the sampling time specified in the protocol, including the number of subjects, arithmetic mean, standard deviation (SD), arithmetic CV% (percentage of inter-individual coefficient of variation), geometric mean, geometric CV%, median, minimum and maximum, which will be summarized by treatment group.

When the plasma concentration data is reported, BQL data should be set to 0 and included in descriptive statistics. In order to present the data clearly, the total number of PK samples corresponding to each time point and the number of samples above LLOQ will be summarized. When at least one concentration data at a certain time point is BQL and descriptive statistics at this time point is performed, it is not necessary to report the geometric mean and geometric CV% (expressed as “NC, not calculable”). When ≥50% of the concentration data at a certain time point is BQL, the mean and median at that time point will be reported as BQL; it is not necessary to report the standard deviation and CV% (expressed as “NC, not calculable”); the minimum and maximum values will be reported as observed values (including BQL).

Using linear and semi-logarithmic coordinates, the plasma concentration-time curve and the corresponding mean plasma concentration-time curve (arithmetic mean + standard deviation) for XW003 will be plotted for individual subjects in different dose groups. The planned PK sampling time will be used to calculate the summary statistics and draw the summary curve (arithmetic mean + standard deviation); the actual PK sampling time will be used to draw the plasma concentration-time curve of individual subjects. To plot the mean plasma concentration-time curve, if ≥50% of the concentration data at a certain time point is BQL, the mean plasma concentration at that time point is BQL. In the linear coordinate diagram, when the mean plasma concentration is BQL, it will be represented as 0. In the semi-logarithmic coordinate diagram, when the mean plasma concentration is BQL, it will not be represented.

Out-of-window plasma concentration data will not be included in the descriptive statistical summary of plasma concentration.

## Immunogenicity

Based on the SS population, the number and percentage of ADA-positive subjects at each scheduled visit will be summarized by treatment group. Meanwhile, all the immunogenicity results of the subjects will be listed. If necessary, an *in vitro* study will be further conducted for subjects with positive results, and an additional detailed ADA analysis reports will be provided separately.

## Interim Analysis

No interim analysis is planned for this study.

# Deviations from Protocol

Compared with the protocol version 2.0, this Statistical Analysis Plan amends the statement of “serious hypoglycemia” to “severe hypoglycemia” for statistics, and adds the statistical analyses for “the proportion of subjects with HbA1c <5.7% after 24 weeks of treatment”, “the proportion of subjects with HbA1c <5.7% after 52 weeks of treatment”, “the proportion of subjects with HbA1c <7.0%, no severe hypoglycemia and no weight gain after 52 weeks of treatment” and “the change in BMI from baseline after 24 weeks and 52 weeks of treatment”, etc.

# References

1. National Medical Products Administration. Guidelines for Biostatistics in Clinical Trials of Drugs. 2016
2. National Medical Products Administration. Guidelines for Data Management and Statistical Analysis Plan of Clinical Trials of Drugs. 2021
3. International conference on harmonization（ICH）. Structure and Content of Clinical Study Reports.
4. International conference on harmonization（ICH）. Statistical Principles for Clinical Trials.
5. International conference on harmonization（ICH）. Addendum on Estimands and Sensitivity Analysis in Clinical Trials.
