# Supplementary material for: Efficacy and safety of cAMP signalling-biased GLP-1 analogue ecnoglutide monotherapy versus placebo in patients with type 2 diabetes (EECOH-1): a randomised, double-blind, placebo-controlled, phase 3 trial
Source: Research Square preprint supplement (doi:10.21203/rs.3.rs-6342890/v1), 2025-05-22
Supplement: Supplementary file 2 [file d4916258a1c3f28a4dab37b7.docx]

1. Title Page


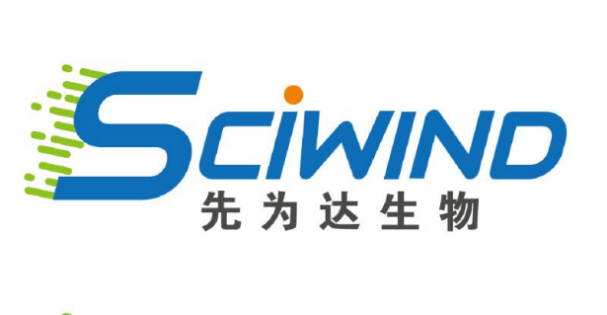


**A Multi-Center, Randomized, Double-Blind, Placebo-Controlled Phase III Clinical Study of Ecnoglutide Injection in Adult Type 2 Diabetes Mellitus Patients with Poor Glycemic Control After Nutrition and Exercise Interventions (EECOH-1)**

Protocol No.: SCW0502-1031

**Sponsor:** Hangzhou Sciwind Biosciences Co., Ltd.

**Study Phase:** III

**Protocol Version/Date:** 2.0/December 13, 2022

**Page:** **92**

This document contains confidential information of Hangzhou Sciwind Biosciences Co., Ltd.

CONFIDENTIAL

This document shall not be used, revealed, published or otherwise disclosed without the consent of Hangzhou Sciwind Biosciences Co., Ltd.

**PROTOCOL REVISION PAGE**

| **Protocol version No.** | **Protocol revision date** | **Description of revision** |
| --- | --- | --- |
| 1.0 | NA | NA |
| 1.1 | October 19, 2022 | According to the actual situation in this project, "plasma glucose" is adjusted to "blood glucose" throughout this document. |
| In "6. Clinical study flowchart, Remark @①": "The determination of baseline is based on the results of retesting" is corrected to "The determination of enrollment review is based on the results of retesting". |
| Adjustment of the format of Figure 1: Schematic diagram of the study design. |
| 2.0 | December 13, 2022 | The original design "Even if the salvage therapy has been initiated, subjects should continue to attend visits according to the study protocol until completion of the clinical study" is adjusted to "For subjects who are treated with salvage therapy during the double-blind core treatment period (Ecnoglutide Injection groups and placebo groups), they will directly enter the safety follow-up period after completing the Week 24 unblinding visit, without receiving the maintenance therapy/carryover therapy". |
| Adjustment of description in Section 17 "Safety Evaluation" |
|  |  | In Section 17.3 "Adverse Events of Special Interest", add the AESI "gallbladder-related disease". |

Protocol Signature Page

(Sponsor)

Study Title: A Multi-Center, Randomized, Double-Blind, Placebo-Controlled Phase III Clinical Study of Ecnoglutide Injection in Adult Type 2 Diabetes Mellitus Patients with Poor Glycemic Control After Nutrition and Exercise Interventions (EECOH-1)

As a representative of (Hangzhou Sciwind Biosciences Co., Ltd., the "Sponsor"), I confirm that a critical review of the study protocol has been conducted. The information contained therein is consistent with the current understanding of the risks and benefits of the investigational product (IMP) and with the moral, ethical and scientific principles governing clinical studies as set out in the current versions of *Declaration of Helsinki* and *Good Clinical Practice (GCP)* guidelines.

| **Sponsor:** | Hangzhou Sciwind Biosciences Co., Ltd. | | |
| --- | --- | --- | --- |
| **Address:** | Room 1802, Building 2, Hangzhou East International Business Center, Qiantang District, Hangzhou City, Zhejiang Province | | |
|  |  | | |
| **Signature of Project Leader:** |  | **Date:** |  |

Protocol Signature Page

(Clinical Study Center)

Study Title: A Multi-Center, Randomized, Double-Blind, Placebo-Controlled Phase III Clinical Study of Ecnoglutide Injection in Adult Type 2 Diabetes Mellitus Patients with Poor Glycemic Control After Nutrition and Exercise Interventions (EECOH-1)

The documents provided to me for this study are kept strictly confidential as requested. These documents include the study protocol, Investigator’s Brochure (IB), electronic Case Report Form (eCRF) and other scientific data.

The study is not allowed to start without prior written approval of the Independent Ethics Committee (IEC). Without prior written approval of the sponsor and the Ethics Committee, no changes shall be made to the study protocol, except for those changes that must be made in order to eliminate immediate harms to the subjects.

I have read the protocol and agree that this clinical study will be carried out in accordance with the protocol and the principles of the current *Declaration of Helsinki* (ethical principles for medical research involving human subjects), as well as the current ICH GCP and GCP guidelines and applicable regulations and guidelines.

I have been informed that I will be responsible for the overall implementation of this study. I agree to personally perform or supervise this clinical study. I agree to ensure that all partners, colleagues and staff of the study center assisting in the conduct of this study are aware of their obligations. Relevant mechanisms are in place to ensure that the staff of the study center can receive appropriate information throughout the study.

| **Name of Study Center:** | Nanjing Drum Tower Hospital, Affiliated Hospital of Nanjing University Medical School | | |
| --- | --- | --- | --- |
| **Address:** | 9F, Building 2, Gulou Hospital Affiliated to Medical College of Nanjing University, No. 321 Zhongshan Road, Nanjing, China | | |
|  |  | | |
| **Signature of Principal Investigator:** |  | **Date:** |  |

Protocol Signature Page

(Contract Research Organization (CRO))

Study Title: A Multi-Center, Randomized, Double-Blind, Placebo-Controlled Phase III Clinical Study of Ecnoglutide Injection in Adult Type 2 Diabetes Mellitus Patients with Poor Glycemic Control After Nutrition and Exercise Interventions (EECOH-1)

The documents provided to us for this study are kept strictly confidential as requested. These documents include the study protocol, Investigator’s Brochure (IB), electronic Case Report Form (eCRF) and other scientific data.

The study is not allowed to start without prior written approval of the Independent Ethics Committee (IEC). Without prior written approval of the sponsor and the Ethics Committee, no changes shall be made to the study protocol, except for those changes that must be made in order to eliminate immediate harms to the subjects.

I have read the protocol and agree that this clinical study will be carried out in accordance with the protocol and the principles of the current *Declaration of Helsinki* (ethical principles for medical research involving human subjects), as well as the current ICH GCP and GCP guidelines and applicable regulations and guidelines. According to the work content entrusted to us by the sponsor and the requirements of the project management and monitoring plan confirmed by the sponsor, we will carry out project management and monitoring for this clinical study project, and perform relevant duties in accordance with the study protocol and SOPs. We agree to abide by the rules and regulations regarding the publication of the study results.

| **CRO Name:** | R&G PharmaStudies Co., Ltd. | | |
| --- | --- | --- | --- |
| **Address:** | 11F, North Tower, Building B, Huatong Plaza, No. 19 Chegongzhuang West Road, Haidian District, Beijing | | |
|  |  | | |
| **Signature of Project Leader:** |  | **Date:** |  |

Protocol Signature Page

(Data Management & Statistical Analysis)

Study Title: A Multi-Center, Randomized, Double-Blind, Placebo-Controlled Phase III Clinical Study of Ecnoglutide Injection in Adult Type 2 Diabetes Mellitus Patients with Poor Glycemic Control After Nutrition and Exercise Interventions (EECOH-1)

The documents provided to us for this study are kept strictly confidential as requested. These documents include the study protocol, Investigator’s Brochure (IB), electronic Case Report Form (eCRF) and other scientific data.

The study is not allowed to start without prior written approval of the Independent Ethics Committee (IEC). Without prior written approval of the sponsor and the Ethics Committee, no changes shall be made to the study protocol, except for those changes that must be made in order to eliminate immediate harms to the subjects.

I have read the protocol and agree that this clinical study will be carried out in accordance with the protocol and the principles of the current *Declaration of Helsinki* (ethical principles for medical research involving human subjects), as well as the current ICH GCP and GCP guidelines and applicable regulations and guidelines.

We promise to properly store and keep all relevant original data and source documents of this study (including electronic and paper documents) in accordance with national GCP requirements and relevant regulations. We will accept the monitoring and audit conducted by the monitor or auditor dispatched by the drug registration applicant as well as the inspection conducted by drug regulatory authorities to ensure the quality of the clinical study.

| **Name of the Data Management & Statistical Analysis:** | R&G PharmaStudies Co., Ltd. | | |
| --- | --- | --- | --- |
| **Address:** | 11F, North Tower, Building B, Huatong Plaza, No. 19 Chegongzhuang West Road, Haidian District, Beijing | | |
|  |  | | |
| **Signature of Person Responsible for Data Management:** |  | **Date:** |  |
| **Signature of Person Responsible for Statistical Analysis:** |  | **Date:** |  |

Protocol Signature Page

(Sample Testing Institution)

Study Title: A Multi-Center, Randomized, Double-Blind, Placebo-Controlled Phase III Clinical Study of Ecnoglutide Injection in Adult Type 2 Diabetes Mellitus Patients with Poor Glycemic Control After Nutrition and Exercise Interventions (EECOH-1)

The documents provided to us for this study are kept strictly confidential as requested. These documents include the study protocol, Investigator’s Brochure (IB), electronic Case Report Form (eCRF) and other scientific data.

The study is not allowed to start without prior written approval of the Independent Ethics Committee (IEC). Without prior written approval of the sponsor and the Ethics Committee, no changes shall be made to the study protocol, except for those changes that must be made in order to eliminate immediate harms to the subjects.

I have read the protocol and agree that this clinical study will be carried out in accordance with the protocol and the principles of the current *Declaration of Helsinki* (ethical principles for medical research involving human subjects), as well as the current ICH GCP and GCP guidelines and applicable regulations and guidelines.

We will perform the services of testing and analysis of biological samples for this clinical study project according to the work content entrusted to us by the sponsor and the requirements of the testing and analysis plan confirmed by the sponsor. We will perform the testing work in accordance with the relevant requirements of the SOP, and agree to abide by the rules and regulations regarding the publication of the study results.

We promise to properly store and keep all relevant original data and source documents of this study (including electronic and paper documents) in accordance with national GCP requirements and relevant regulations. We will accept the monitoring and audit conducted by the monitor or auditor dispatched by the drug registration applicant as well as the inspection conducted by drug regulatory authorities to ensure the quality of the clinical study.

| **Name of the Central Testing Institution:** | Guangzhou KingMed Center for Clinical Laboratory Co., Ltd. | | |
| --- | --- | --- | --- |
| **Address:** | No. 10 Third Luoxuan Road, International Bio-Island, Huangpu District, Guangzhou, China | | |
| **Signature of Project Leader:** |  | **Date:** |  |

**PROTOCOL SIGNATURE PAGE**

(Sample Testing Institution)

Study Title: A Multi-Center, Randomized, Double-Blind, Placebo-Controlled Phase III Clinical Study of Ecnoglutide Injection in Adult Type 2 Diabetes Mellitus Patients with Poor Glycemic Control After Nutrition and Exercise Interventions (EECOH-1)

The documents provided to us for this study are kept strictly confidential as requested. These documents include the study protocol, Investigator’s Brochure (IB), electronic Case Report Form (eCRF) and other scientific data.

The study is not allowed to start without prior written approval of the Independent Ethics Committee (IEC). Without prior written approval of the sponsor and the Ethics Committee, no changes shall be made to the study protocol, except for those changes that must be made in order to eliminate immediate harms to the subjects.

I have read the protocol and agree that this clinical study will be carried out in accordance with the protocol and the principles of the current *Declaration of Helsinki* (ethical principles for medical research involving human subjects), as well as the current ICH GCP and GCP guidelines and applicable regulations and guidelines.

We will perform the services of testing and analysis of biological samples for this clinical study project according to the work content entrusted to us by the sponsor and the requirements of the testing and analysis plan confirmed by the sponsor. We will perform the testing work in accordance with the relevant requirements of the SOP, and agree to abide by the rules and regulations regarding the publication of the study results.

We promise to properly store and keep all relevant original data and source documents of this study (including electronic and paper documents) in accordance with national GCP requirements and relevant regulations. We will accept the monitoring and audit conducted by the monitor or auditor dispatched by the drug registration applicant as well as the inspection conducted by drug regulatory authorities to ensure the quality of the clinical study.

| **Name of the PK Sample Testing Institution:** | Shanghai Xihua Scientific Co., Ltd. | | |
| --- | --- | --- | --- |
| **Address:** | Building 6, No.118 Furonghua Road, Pudong New Area, Shanghai, China | | |
| **Signature of Project Leader:** |  | **Date:** |  |
|  |  | | |
| **Name of the Immunogenicity Sample Testing Institution:** | Shanghai Xihua Scientific Co., Ltd. | | |
| **Address:** | Building 6, No.118 Furonghua Road, Pudong New Area, Shanghai, China | | |
| **Signature of Project Leader:** |  | **Date:** |  |

Emergency Procedures

**Table 1. Emergency Contacts**

| Role | Name | Address and telephone |
| --- | --- | --- |
| Leader of the Clinical Center | Prof. Dalong Zhu  Principal Investigator | 9F, Building 2, Gulou Hospital Affiliated to Medical College of Nanjing University, No. 321 Zhongshan Road, Nanjing, China  Landline number: 025-68182432 |
| Study Director | Lei Guan | Room 1802, Building 2, Hangzhou East International Business Center, Qiantang District, Hangzhou City, Zhejiang Province  18910900897 |
| Medical Monitor of the sponsor | Qing Zheng | Room 1802, Building 2, Hangzhou East International Business Center, Qiantang District, Hangzhou City, Zhejiang Province  13346187606 |

1. Institutions and personnel

**Table 2. Institutions and Personnel**

| Principal Investigator | Prof. Dalong Zhu  025-68182432  Nanjing Drum Tower Hospital, Affiliated Hospital of Nanjing University Medical School  9F, Building 2, Gulou Hospital Affiliated to Medical College of Nanjing University, No. 321 Zhongshan Road, Nanjing, China |
| --- | --- |
| Sponsor | Lei Guan  18910900897  Hangzhou Sciwind Biosciences Co., Ltd.  Room 1802, Building 2, Hangzhou East International Business Center, Qiantang District, Hangzhou City, Zhejiang Province |
| Contract Research Organization (CRO) | Ling Wang  15996307189  R&G PharmaStudies Co., Ltd.  11F, North Tower, Building B, Huatong Plaza, No. 19 Chegongzhuang West Road, Haidian District, Beijing |
| Local Medical Monitor | Yuwei Liu  13998139440  R&G PharmaStudies Co., Ltd.  11F, North Tower, Building B, Huatong Plaza, No. 19 Chegongzhuang West Road, Haidian District, Beijing |
| Central Laboratory | Zhizhou Liang  18198935345  Guangzhou KingMed Center for Clinical Laboratory Co., Ltd.  No. 10 Third Luoxuan Road, International Bio-Island, Huangpu District, Guangzhou, China |
| Bioanalytical Laboratory | Jia Liu  18501685624  Shanghai Xihua Scientific Co., Ltd.  Building 6, No.118 Furonghua Road, Pudong New Area, Shanghai, China |
| Biostatistical Analysis | Li Li  15553505208  R&G PharmaStudies Co., Ltd.  11F, North Tower, Building B, Huatong Plaza, No. 19 Chegongzhuang West Road, Haidian District, Beijing |
| Data Management | Xiaoyan Yin  13348861765  R&G PharmaStudies Co., Ltd.  11F, North Tower, Building B, Huatong Plaza, No. 19 Chegongzhuang West Road, Haidian District, Beijing |

1. Table of Contents and List of Tables

**TABLE OF CONTENTS**

[1. Title Page 1](#_Toc181101913)

[Protocol Signature Page 3](#_Toc181101914)

[Protocol Signature Page 4](#_Toc181101915)

[Protocol Signature Page 5](#_Toc181101916)

[Protocol Signature Page 6](#_Toc181101917)

[Protocol Signature Page 7](#_Toc181101918)

[Emergency Procedures 9](#_Toc181101919)

[2. Institutions and personnel 10](#_Toc181101920)

[3. Table of Contents and List of Tables 11](#_Toc181101921)

[4. List of abbreviations and term definitions 18](#_Toc181101922)

[5. Synopsis 21](#_Toc181101923)

[6. Clinical study flowchart 27](#_Toc181101924)

[7. Study background 31](#_Toc181101925)

[7.1. Introduction 31](#_Toc181101926)

[7.2. Summary of Nonclinical and Clinical Studies 31](#_Toc181101927)

[7.2.1 Nonclinical pharmacology and pharmacodynamics 31](#_Toc181101928)

[7.2.2 Nonclinical safety pharmacology 32](#_Toc181101929)

[7.2.3 Toxicological studies 32](#_Toc181101930)

[7.2.4 Clinical studies 32](#_Toc181101931)

[7.3. Summary of Potential Risks and Benefits 34](#_Toc181101932)

[7.4. Rational for the Selection of Dosage and Study Period 34](#_Toc181101933)

[8. Study objectives, study endpoints and estimands 36](#_Toc181101934)

[8.1. Study Objectives 36](#_Toc181101935)

[8.1.1 Primary objective 36](#_Toc181101936)

[8.1.2 Secondary objectives 36](#_Toc181101937)

[8.2. Endpoints 36](#_Toc181101938)

[8.2.1 Efficacy evaluation endpoints 36](#_Toc181101939)

[8.2.2 Safety endpoints 36](#_Toc181101940)

[8.2.3 Population pharmacokinetics endpoints 36](#_Toc181101941)

[8.2.4 Immunogenicity endpoints 37](#_Toc181101942)

[8.3. Estimand 37](#_Toc181101943)

[8.3.1 Primary estimand 37](#_Toc181101944)

[8.3.1.1. Population 37](#_Toc181101945)

[8.3.1.2. Treatment 37](#_Toc181101946)

[8.3.1.3. Variable 37](#_Toc181101947)

[8.3.1.4. Intercurrent events and processing strategies 37](#_Toc181101948)

[8.3.1.5. Population-level summary 38](#_Toc181101949)

[8.3.2 Secondary estimand 1 38](#_Toc181101950)

[8.3.3 Secondary estimand 2 38](#_Toc181101951)

[9. Study Plan 39](#_Toc181101952)

[9.1. Overall Study Design 39](#_Toc181101953)

[9.2. Number of Subjects 39](#_Toc181101954)

[9.3. Treatment Assignment 39](#_Toc181101955)

[9.3.1 Randomization 39](#_Toc181101956)

[9.3.2 Blind setting 40](#_Toc181101957)

[9.3.2.1. Allocation concealment 40](#_Toc181101958)

[9.3.2.2. Emergency unblinding 40](#_Toc181101959)

[9.3.2.3. Unblinding provisions 40](#_Toc181101960)

[10. Subject selection, dropout and study discontinuation 41](#_Toc181101961)

[10.1. Inclusion Criteria 41](#_Toc181101962)

[10.2. Exclusion Criteria 41](#_Toc181101963)

[10.3. Subject Dropouts 43](#_Toc181101964)

[10.4. Criteria for Study Termination 44](#_Toc181101965)

[10.4.1 Termination of the study requested by the investigator 44](#_Toc181101966)

[10.4.2 Sponsor's request to terminate the study 44](#_Toc181101967)

[10.4.3 Termination of the study requested by the governmental authority 44](#_Toc181101968)

[11. Treatment of subjects 44](#_Toc181101969)

[11.1. Description of the Study Drug(s) 44](#_Toc181101970)

[11.2. Dose Regimen 45](#_Toc181101971)

[11.3. Concomitant Medications 46](#_Toc181101972)

[11.3.1 Prohibited concomitant medications/treatment 46](#_Toc181101973)

[11.3.2 Permitted concomitant medications 46](#_Toc181101974)

[11.3.3 Salvage therapy 46](#_Toc181101975)

[11.4. Contraception and other Restrictions 47](#_Toc181101976)

[11.4.1 Contraception 47](#_Toc181101977)

[11.4.2 Smoking and alcohol consumption 47](#_Toc181101978)

[11.5. Medication Compliance 47](#_Toc181101979)

[12. Management of investigational drug(s) 48](#_Toc181101980)

[12.1. Investigational Drug(s) 48](#_Toc181101981)

[12.2. Packaging and Labeling of Investigational Drug 48](#_Toc181101982)

[12.3. Storage of Investigational Drug 48](#_Toc181101983)

[12.4. Preparation of Investigational Drug(s) 48](#_Toc181101984)

[12.5. Medication Training and Records 48](#_Toc181101985)

[12.6. Accountability of Investigational Drug(s) 48](#_Toc181101986)

[12.7. Handling and Disposal of Investigational Drug(s) 48](#_Toc181101987)

[13. Study process 49](#_Toc181101988)

[13.1. Screening Period (D-42 to D-29) 49](#_Toc181101989)

[13.2. Run-in Period (D-28 to D-7) - Visits -2 to -1 49](#_Toc181101990)

[13.3. Double-blind Main Study Period 50](#_Toc181101991)

[13.3.1 D1 - Visit 1 50](#_Toc181101992)

[13.3.2 D29 / D57 / D85 / D113 - Visits 2 to 5 50](#_Toc181101993)

[13.3.3 D168 - Visit 6 51](#_Toc181101994)

[13.4. Open-label Treatment Period 52](#_Toc181101995)

[13.4.1 D197 / D225 / D253 / D309 - Visits 7 to 10 52](#_Toc181101996)

[13.4.2 D364 - Visit 11 52](#_Toc181101997)

[13.5. Safety Follow-up Period (D399 - Visit 12) 53](#_Toc181101998)

[13.6. Early Exit 53](#_Toc181101999)

[14. Efficacy Assessments 55](#_Toc181102000)

[14.1. Pharmacodynamic (PD) Measures 55](#_Toc181102001)

[14.1.1 Sample collection 55](#_Toc181102002)

[14.1.2 Sample testing 56](#_Toc181102003)

[14.1.3 Sample processing 56](#_Toc181102004)

[14.2. Body Measurements 56](#_Toc181102005)

[14.2.1 Weight and height 56](#_Toc181102006)

[14.2.2 Waist and hip circumferences 56](#_Toc181102007)

[15. Population PK Assessments 57](#_Toc181102008)

[15.1. Sample Collection 57](#_Toc181102009)

[15.2. Sample Testing 57](#_Toc181102010)

[15.3. Sample Processing 57](#_Toc181102011)

[15.4. Sample Shipment 57](#_Toc181102012)

[16. Immunogenicity Assessments 59](#_Toc181102013)

[16.1. Sample Collection 59](#_Toc181102014)

[16.2. Sample Testing 59](#_Toc181102015)

[16.3. Sample Processing 59](#_Toc181102016)

[16.4. Sample Shipment 59](#_Toc181102017)

[17. Safety evaluation 60](#_Toc181102018)

[17.1. Safety Parameters 60](#_Toc181102019)

[17.1.1 Vital signs 60](#_Toc181102020)

[17.1.2 Physical examination 60](#_Toc181102021)

[17.1.3 12-lead ECG 60](#_Toc181102022)

[17.1.4 Laboratory assessments 60](#_Toc181102023)

[17.1.5 Blood glucose monitoring 60](#_Toc181102024)

[17.1.6 Viral serology 60](#_Toc181102025)

[17.2. Adverse Events 60](#_Toc181102026)

[17.2.1 Definition of adverse events 60](#_Toc181102027)

[17.2.2 Severity of an adverse event 61](#_Toc181102028)

[17.2.3 Causality assessment between AE and investigational product 62](#_Toc181102029)

[17.2.4 Evaluation of clinical laboratory test abnormalities and other abnormalities considered as AEs or SAEs 62](#_Toc181102030)

[17.2.5 Action taken with investigational product 62](#_Toc181102031)

[17.2.6 Outcome 63](#_Toc181102032)

[17.3. Adverse Events of Special Interest 63](#_Toc181102033)

[17.4. Definition of Serious Adverse Events, Suspected Unexpected Serious Adverse Reactions, and Important Medical Events 63](#_Toc181102034)

[17.5. Pregnancy Exposure Events 63](#_Toc181102035)

[17.6. Reporting of Serious Adverse Events and Suspected Unexpected Serious Adverse Reactions 64](#_Toc181102036)

[17.7. Follow-up of Adverse Events and Serious Adverse Events 64](#_Toc181102037)

[17.8. Recording Adverse Events 64](#_Toc181102038)

[18. Direct Access to Source Data/Documents 66](#_Toc181102039)

[18.1. Study Monitoring 66](#_Toc181102040)

[18.2. Audits and Inspections 66](#_Toc181102041)

[19. Data Management 67](#_Toc181102042)

[19.1. Data Management System 67](#_Toc181102043)

[19.2. Data Management Plan (DMP) 67](#_Toc181102044)

[19.3. eCRF Design 67](#_Toc181102045)

[19.4. Data Verification Plan (DVP) 67](#_Toc181102046)

[19.5. Database Build 67](#_Toc181102047)

[19.6. User Acceptance Testing (UAT) 67](#_Toc181102048)

[19.7. EDC Training 67](#_Toc181102049)

[19.8. Data Entry and Review Process 68](#_Toc181102050)

[19.9. Medical Coding 68](#_Toc181102051)

[19.10. External Data Management 68](#_Toc181102052)

[19.11. Data Validation Meeting 68](#_Toc181102053)

[19.12. Database Lock 68](#_Toc181102054)

[19.13. Data Management Report (DMR) 69](#_Toc181102055)

[19.14. Archiving of Data and Documents 69](#_Toc181102056)

[20. Statistical Considerations 70](#_Toc181102057)

[20.1. Hypothesis Testing and Multiplicity 70](#_Toc181102058)

[20.2. Sample Size 70](#_Toc181102059)

[20.3. Statistical Analysis Population 70](#_Toc181102060)

[20.4. General Statistical Considerations 70](#_Toc181102061)

[20.5. Demographics and Baseline Characteristics 70](#_Toc181102062)

[20.6. Efficacy Analysis 71](#_Toc181102063)

[20.6.1 Analysis of primary estimand 71](#_Toc181102064)

[20.6.2 Analysis of secondary estimands 71](#_Toc181102065)

[20.7. Safety Analysis 71](#_Toc181102066)

[20.7.1 Prior and concomitant therapy 71](#_Toc181102067)

[20.7.2 Adverse events 72](#_Toc181102068)

[20.7.3 Laboratory evaluation 72](#_Toc181102069)

[20.7.4 Vital signs 72](#_Toc181102070)

[20.7.5 Physical examination 72](#_Toc181102071)

[20.7.6 12-lead ECG 72](#_Toc181102072)

[20.8. Population pharmacokinetic analysis 72](#_Toc181102073)

[20.9. Immunogenicity 73](#_Toc181102074)

[20.10. Handling of Missing Data 73](#_Toc181102075)

[20.11. Interim Analysis 73](#_Toc181102076)

[20.12. Statistical Analysis Plan 73](#_Toc181102077)

[21. Ethical and Regulatory Requirements 74](#_Toc181102078)

[21.1. Ethical Conduct and Ethical Approval of the Study 74](#_Toc181102079)

[21.2. Informed Consent Procedure 74](#_Toc181102080)

[21.3. Amendments to Study Protocol and Informed Consent Form 74](#_Toc181102081)

[21.4. Closure of Study Center 74](#_Toc181102082)

[21.5. Retention of Records 75](#_Toc181102083)

[21.6. Confidentiality and Privacy 75](#_Toc181102084)

[21.7. Privacy of Publication 75](#_Toc181102085)

[22. Quality Control and Quality Assurance 77](#_Toc181102086)

[22.1. Clinical Monitoring 77](#_Toc181102087)

[22.2. Quality Assurance Audit/Inspection 77](#_Toc181102088)

[23. Clinical Study Report 79](#_Toc181102089)

[24. References 80](#_Toc181102090)

[Appendix I. Criteria for Diagnosis of Diabetes (1999 WHO Criteria) 81](#_Toc181102091)

[Appendix II. Diagnosis and Treatment Process of Hypoglycaemia - *Guideline for the Prevention and Treatment of Type 2 Diabetes Mellitus in China* (2020 edition) 82](#_Toc181102092)

[Appendix III. Self-monitoring of Blood Glucose 84](#_Toc181102093)

[Appendix IV. Diet and Exercise Guidance - *Guideline for the Prevention and Treatment of Type 2 Diabetes Mellitus in China* (2020 edition) 85](#_Toc181102094)

[Appendix V. Salvage Treatment Drugs 88](#_Toc181102095)

[Appendix VI. Calculation Method/Formula for Estimated Glomerular Filtration Rate (eGFR) 89](#_Toc181102096)

[Appendix VII. Classification of NYHA Heart Function Criteria 90](#_Toc181102097)

[Appendix VIII. Body Weight and Height Measurement Instructions 91](#_Toc181102098)

[Appendix IX. Waist Circumference and Hip Circumference Measurement Instructions 92](#_Toc181102099)

**LIST OF TABLES**

[**Table 1. Emergency Contacts** 9](#_Toc164980190)

[**Table 2. Institutions and Personnel** 10](#_Toc164980191)

[**Table 3. Summary of Exposures to the Investigational Product (as of August 31, 2022)** 32](#_Toc164980192)

[**Table 4. Blood Sampling Schedule for HbA1c and FPG Analysis** 54](#_Toc164980193)

[**Table 5. Blood Sampling Schedule for Analysis of 2hPBG** 54](#_Toc164980194)

[**Table 6. Blood Sampling Schedule for Insulin Analysis** 54](#_Toc164980195)

[**Table 7. Blood Sampling Schedule for Lipid Analysis** 54](#_Toc164980196)

[**Table 8. 7-Point Self-Monitoring Blood Glucose Schedule** 55](#_Toc164980197)

[**Table 9. Schedule for PopPK Sample Collection** 56](#_Toc164980198)

[**Table 10. Schedule for Immunogenicity Sample Collection** 58](#_Toc164980199)

[**Table 11. Classification of Glucose Metabolism** 80](#_Toc164980200)

[**Table 12. Criteria for Diagnosis of Diabetes** 80](#_Toc164980201)

[**Table 13. Classification of NYHA Heart Function Criteria** 90](#_Toc164980202)

1. List of abbreviations and term definitions

| Abbreviations or technical terms | Description |
| --- | --- |
| AE | Adverse Events |
| AESI | Adverse Events of Special Interest |
| ALB | Albumin |
| ALP | Alkaline Phosphatase |
| ALT | Alanine Aminotransferase |
| AMY | Amylase |
| APTT | Activated Partial Thromboplastin Time |
| AST | Aspartate Aminotransferase |
| ATC | Anatomical Therapeutic Chemical classification system |
| BASO | Basophil Count |
| BMI | Body Mass Index |
| BUN | Urea Nitrogen |
| CA | Total Calcium |
| CL | Chlorine |
| CR | Creatinine |
| CRA | Clinical Research Associate |
| CRC | Clinical Research Coordinator |
| CRF | Case Report Form |
| CRO | Contract Research Organization |
| CSR | Clinical Study Report |
| CTCAE | Common Terminology Criteria for Adverse Events |
| Ctrough | Trough Concentration at Dosing Intervals |
| DBIL | Direct Bilirubin |
| DFBG | Fibrinogen |
| DKA | Diabetic Ketoacidosis |
| DMP | Data Management Plan |
| DPP-4 | Dipeptidyl peptidase 4 |
| DVP | Database Verification Plan |
| eCRF | Electronic Case Report Form |
| eGFR | Estimated Glomerular Filtration Rate |
| ECG | Electrocardiogram |
| EDC | Electronic Data Capture |
| EO | Eosnophil Count |
| ETD | Estimated Treatment Difference |
| FAS | Full Analysis Set |
| FPG | Fasting Plasma Glucose |
| FT3 | Free Tri-Iodothyronine |
| FT4 | Free Tetra-Iodothyronine |
| GCP | Good Clinical Practice |
| GLP-1 | Glucagon-Like Peptide 1 |
| GLU | Glucose |
| GMP | Good Manufacturing Practice |
| GGT | Gamma-Glutamyltranspeptidase |
| HbA1c | Glycosylated Hemoglobin |
| HBsAg | Hepatitis B Surface Antigen |
| HCT | Hematocrit |
| HCV | Hepatitis C Virus |
| HDL | High Density Lipoprotein |
| HGB | Hemoglobin |
| HHS | Hyperosmolar Hyperglycemic State |
| HIV | Human Immunodeficiency Virus |
| IB | Investigator's Brochure |
| ICF | Informed Consent Form |
| ICH | International Council for Harmonization |
| IDF | International Diabetes Federation |
| IEC/IRB | Ethics Committee |
| IME | Important Medical Event |
| IMP | Investigational Medicinal Product |
| INR | International Normalized Ratio |
| K | Potassium |
| KET | Ketones |
| LDA | Diabetic Lactic Acidosis |
| LDL | Low Density Lipoprotein |
| LIP | Lipase |
| LYM | Lymphocyte Count |
| MedDRA | Medical Dictionary for Regulatory Activities |
| MDRD | Modification of Diet in Renal Disease Equation |
| MEN2 | Multiple Endocrine Neoplasia Type 2 |
| MTC | Medullary Thyroid Carcinoma |
| Na | Sodium |
| MONO | Monocyte Count |
| NEUT | Neutrophil Count |
| P | Phosphorus |
| PD | Pharmacodynamics |
| PK | Pharmacokinetics |
| PH | Pondus Hydrogenii |
| PLT | Platelet |
| PT | Preferred Term/Prothrombin Time |
| PRO | Urine Protein |
| RBC | Red Blood Cell |
| SAE | Serious Adverse Events |
| SAP | Statistical Analysis Plan |
| SD | Standard Deviation |
| SDV | Source Data Verification |
| SMBG | Self-Monitoring of Blood Glucose |
| SOC | System Organ Class |
| SOP | Standard Operating Procedure |
| SUSAR | Suspected and Unexpected Serious Adverse Reaction |
| SS | Safety Set |
| TBIL | Total Bilirubin |
| TC | Cholesterol |
| TEAE | Treatment-Emergent Adverse Event |
| TG | Triglyceride |
| TP | Total Protein |
| T2DM | Type 2 Diabetes Mellitus |
| TSH | Thyroid-Stimulating Hormone |
| TT | Thrombin Time |
| UA | Uric Acid |
| ULN | Upper Limit of Normal |
| UREA | Urea |
| WBC | White Blood Cell Count |
| WHO | World Health Organization |
| WHODrug | World Health Organization Drug Dictionary |

1. Synopsis

| **Sponsor:**  Hangzhou Sciwind Biosciences Co., Ltd. | |
| --- | --- |
| **Investigational Product:**  Ecnoglutide Injection | |
| **Active Ingredient:**  Ecnoglutide (Acylated recombinant human glucagon-like peptide 1 (GLP-1) analog) | |
| **Protocol No.:**  SCW0502-1031 | |
| **Study Title:**  A Multi-Center, Randomized, Double-Blind, Placebo-Controlled Phase III Clinical Study of Ecnoglutide Injection in Adult Type 2 Diabetes Mellitus Patients with Poor Glycemic Control After Nutrition and Exercise Interventions (EECOH-1) | |
| **Study Center:** Gulou Hospital Affiliated to Medical College of Nanjing University | |
| **Principal Investigator:** Prof. Dalong Zhu | |
| **Study Duration (year and month):**  Planned enrollment date of the first subject: March 2023  Planned study completion date of the last subject: March 2025 | **Study Phase:**  Phase III |
| **Study Objectives**  Primary objective:   - To evaluate the efficacy of Ecnoglutide Injection administered for 24 weeks in adult subjects with type 2 diabetes mellitus (T2DM).   Secondary objectives:   - To evaluate the efficacy of Ecnoglutide Injection administered for 52 weeks in adult subjects with T2DM. - To evaluate the safety of Ecnoglutide Injection administered for 24 weeks and 52 weeks in adult subjects with T2DM. - To evaluate the population pharmacokinetics of Ecnoglutide Injection administered in adult subjects with T2DM. - To evaluate the immunogenicity of Ecnoglutide Injection administered in adult T2DM subjects. | |
| **Estimand**  The primary estimand of this study is the inter-group difference of the mean change from baseline in glycosylated hemoglobin (HbA1c) in each test group versus the placebo group after 24 weeks of weekly treatment with Ecnoglutide Injection (0.6 mg or 1.2 mg) or placebo in adult patients with T2DM who do not achieve the desired level of control after 8 weeks of nutrition and exercise interventions, regardless of whether there is early termination of treatment or salvage therapy.  **Strategies for intercurrent events**  For the primary estimand, the treatment policy strategy will be used for early termination of treatment and salvage therapy; for the secondary estimand, the hypothetical strategy will be used for salvage therapy. | |
| **Study Design**  This study is a multi-center, randomized, double-blind, placebo-controlled Phase III clinical study of Ecnoglutide Injection in adult type 2 diabetes mellitus patients with poor glycemic control after nutrition and exercise interventions.  This study will be divided into 5 periods, namely, a 2-week screening period, a 4-week run-in period, a 24-week double-blind core treatment period, a 28-week open-label treatment period and a 5-week safety follow-up period. A total of 210 subjects are planned to be enrolled, and those who meet the inclusion criteria and do not meet the exclusion criteria will be stratified by baseline HbA1c (≤8.5% and >8.5%) and randomly assigned (2:2:1:1) to the following groups: the 1.2 mg dose group of Ecnoglutide Injection (N=70), the 0.6 mg dose group of Ecnoglutide Injection (N=70), the 1.2 mg Ecnoglutide volume-matching placebo group (N=35) and the 0.6 mg Ecnoglutide volume-matching placebo group (N=35); the two placebo control groups will be pooled for statistical analyses (N=70).   - **Screening period (Week -6 to Week -5)**   Subjects will begin to participate in the screening within 14 days prior to the run-in period, and will be required to sign an informed consent form prior to any study-specific procedures or assessments. All subjects who meet the inclusion criteria and do not meet any of the exclusion criteria will be enrolled in order of screening number.   - **Run-in period (Week -4 to Week -1)**   Subjects who meet the inclusion criteria and do not meet any of the exclusion criteria will enter a 4-week run-in period on D-28. Subjects will receive Ecnoglutide placebo (vehicle of Ecnoglutide Injection) at 0.15 mL once weekly for 4 weeks.   - **Double-blind core treatment period (Week 1 to Week 24)**   According to the test results on D-7, the subjects will be re-evaluated before randomization, and after confirming that they meet the inclusion criteria and do not meet the exclusion criteria, the study drugs will be randomly assigned to them; the subjects will receive subcutaneous injection of the Ecnoglutide Injection or placebo once a week, to complete the 24-week core treatment period. For the 1.2 mg dose group, Weeks 1 to 4 is the starting dose titration cycle, with weekly administration of 0.3 mg Ecnoglutide Injection or a volume-matching placebo; Weeks 5 to 8 is the intermediate dose titration cycle, with weekly administration of 0.6 mg Ecnoglutide Injection or a volume-matching placebo; Weeks 9 to 24 is the maintenance dose cycle, with weekly administration of 1.2 mg Ecnoglutide Injection or a volume-matching placebo. For the 0.6 mg dose group, Weeks 1 to 4 is the starting dose titration cycle, with weekly administration of 0.3 mg Ecnoglutide Injection or a volume-matching placebo, and Weeks 5 to 24 is the maintenance dose cycle, with weekly administration of 0.6 mg Ecnoglutide Injection or a volume-matching placebo.  Those subjects who receive salvage therapy during the double-blind core treatment period will be discontinued from study drug upon completion of the double-blind core treatment, and the study is completed after a 5-week safety follow-up period after the last dose.   - **Open-label treatment period (Week 25 to Week 52)**   After the subjects complete the 24-week double-blind treatment, individual subject unblinding will be performed; after the unblinding, subjects receiving Ecnoglutide Injection during the double-blind core treatment period will continue to maintain on their original dose of Ecnoglutide Injection for 28 weeks; and subjects receiving placebo during the double-blind core treatment period will be treated with Ecnoglutide Injection and receive dose titration. Subjects from the 1.2 mg volume-matching placebo group will receive dose titration starting from a low dose of 0.3 mg Ecnoglutide Injection administered for 4 weeks, to 0.6 mg Ecnoglutide Injection administered for 4 weeks, and further to 1.2 mg Ecnoglutide Injection administered for 20 weeks, for a total treatment period of 28 weeks. Subjects from the 0.6 mg volume-matching placebo group will receive dose titration starting from a low dose of 0.3 mg Ecnoglutide Injection administered for 4 weeks, to 0.6 mg Ecnoglutide Injection administered for 24 weeks, for a total treatment period of 28 weeks.  Subjects treated with salvage therapy during the open-label treatment period should continue to attend the visits as specified in the protocol until completion of the clinical study.   - **Safety follow-up period (Week 53 to Week 57)**   After the subjects complete a total of 52 weeks of treatment, they enter the 5-week safety follow-up period. 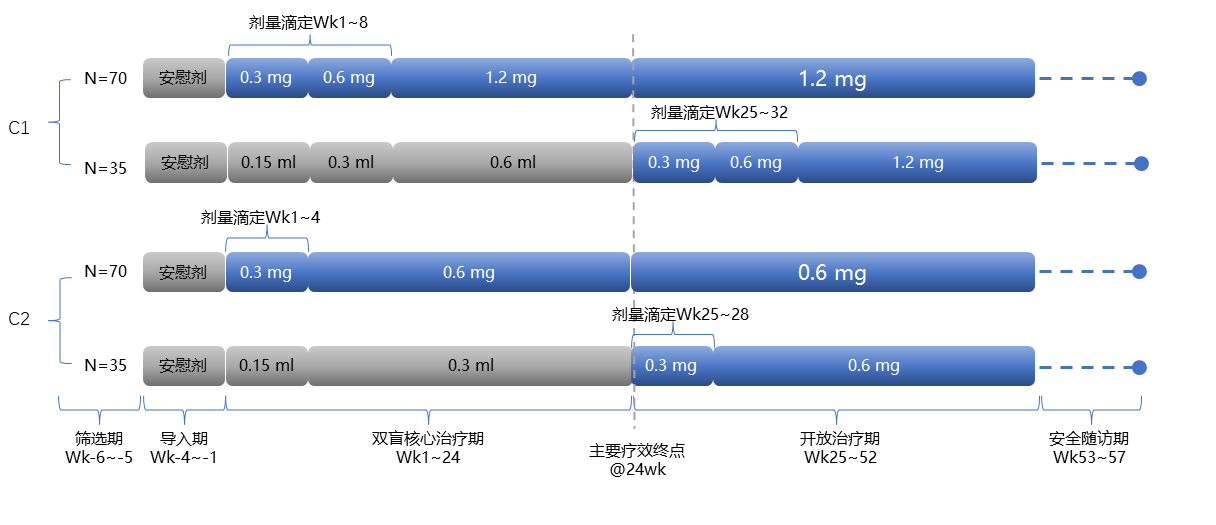 Dose titration Wk1~8  Dose titration Wk1~4  Dose titration Wk25~32  Dose titration Wk25~28  Placebo  Placebo  Placebo  Placebo  Screening period  Run-in period  Double-blind main study period  Primary efficacy endpoints  Open-label treatment period  Safety follow-up period | |
| **Selection of Subjects**  **Inclusion criteria: subjects must meet all of the following inclusion criteria to be enrolled**   1. Male or female, aged 18 to 75 years old (inclusive) when signing the informed consent; 2. Body mass index (BMI) ≥ 20.0 kg/m2 and ≤ 35.0 kg/m2; 3. Meet the Diagnostic Criteria for Diabetes Mellitus promulgated by the World Health Organization (WHO) in 1999, have been diagnosed with T2DM for at least 3 months and received nutrition and exercise interventions for 8 weeks prior to screening, and meet one of the following criteria: 4. No use of any hypoglycemic agents in the previous 12 weeks, or 5. Use of only one oral hypoglycemic agent within the previous 12 weeks, but no further use within 2 weeks prior to screening; 6. HbA1c ≥ 7.5% and ≤ 11.0% at screening (local laboratory) and HbA1c ≥ 7.0% and ≤ 10.5% before randomization (central laboratory); 7. Fasting plasma glucose (FPG) ≤ 13.9 mmol/L at screening and pre-randomization (local laboratory); 8. Willing and able to perform self-monitoring of blood glucose (SMBG) and record diary cards on time; 9. Fully understand the study objectives, able to communicate well with the investigator, and able to understand and comply with the requirements set forth for this study.   **Exclusion criteria: subjects will be excluded from the study if they meet any of the following exclusion criteria:**   1. Prior diagnosis of type 1 diabetes mellitus or other types of diabetes mellitus; 2. Use of GLP-1 analogs or DPP-4 inhibitors within 3 months prior to screening; 3. Use of any insulin preparation within 6 months prior to screening (except for short-term insulin therapy related to complications, i.e., total treatment duration ≤ 14 days); 4. History of diabetic ketoacidosis (DKA), hyperosmolar hyperglycemic state (HHS) and diabetic lactic acidosis (DLA) within 6 months prior to screening; 5. Presence of severe chronic complications of diabetes mellitus (e.g., proliferative retinopathy or macular degeneration, severe diabetic neuropathy, diabetic foot, etc.) within 6 months prior to screening; 6. Confirmed or suspected grade 3 hypoglycemia episodes within 6 months prior to screening, or 2 or more hypoglycemia episodes (blood glucose < 3.9 mmol/L) within 1 month prior to screening; 7. History of severe trauma or serious infection or surgery that may affect glycemic control within 1 month prior to screening; 8. History of uncontrolled hyperthyroidism or hypothyroidism, except those subjects who have received stable dose of thyroid replacement therapy for at least 3 months prior to screening and whose thyroid function test results (thyroid-stimulating hormone [TSH]/free tri-iodothyronine [FT3]/free tetra-iodothyronine [FT4]) are in the normal range; 9. Prior personal or family history of medullary thyroid carcinoma (MTC) or multiple endocrine neoplasia syndrome type 2 (MEN2); 10. Medical or non-medical weight management, including unapproved weight management medications or products, within 3 months prior to screening, or a change in body weight of more than 5% (as self-reported by the subject) within 3 months prior to screening; 11. Prior history of significant cardiovascular disease, defined as: 12. History of myocardial infarction, coronary angioplasty or bypass grafting, heart valve disease or heart valve repair surgery, clinically significant unstable arrhythmia, unstable angina, transient ischemic attack, or cerebral vascular accident within 6 months prior to screening; 13. Congestive heart failure with a New York Heart Association (NYHA) classification of class III or IV (see Appendix VII); 14. Comorbid poorly controlled respiratory diseases, including but not limited to chronic obstructive pulmonary disease, bronchial asthma, and active tuberculosis, within 6 months prior to screening; 15. History of severe gastrointestinal disease (e.g., active ulcers) or gastrointestinal surgery (other than appendectomy or cholecystectomy) or clinically significant gastric emptying abnormalities (e.g., pyloric obstruction, gastroparesis) or chronic use of medications that have a direct effect on gastrointestinal motility within 6 months prior to screening; 16. Prior history of acute and chronic pancreatitis, symptomatic gallbladder disease, pancreatic injury and other factors that may contribute to a high risk of pancreatitis; 17. Prior diagnosis of malignant tumor (except cured basal cell carcinoma of the skin or carcinoma in situ of the cervix) within 5 years; 18. Pre-existing uncontrolled psychiatric and neurological disorders; 19. Positive hepatitis B surface antigen [HBsAg] (except for those with quantitative hepatitis B virus [HBV] deoxyribonucleic acid [DNA] test results below the lower limit of the reference range of the assay), or positive hepatitis C virus [HCV] antibody, or positive human immunodeficiency virus [HIV] antibody at the time of screening; 20. Screening or pre-randomization test results meeting any of the following criteria: 21. Uncontrolled hypertension: systolic blood pressure ≥160 mmHg and/or diastolic blood pressure ≥ 100 mmHg; 22. Liver disease or impaired liver function, such as alanine aminotransferase (ALT) or aspartate aminotransferase (AST) ≥ 2.5 times the upper limit of normal (ULN); 23. Impaired pancreatic function, with blood amylase or blood lipase ≥ 1.5 times the ULN; 24. Impaired renal function, i.e., estimated glomerular filtration rate (eGFR) ≤ 45 mL/min/1.73 m2 (Modification of Diet in Renal Disease [MDRD] equation); 25. Dyslipidemia, such as fasting triglycerides (TG) > 5.65 mmol/L; 26. Fasting C-peptide < 0.8 ng/mL (or 0.26 nmol/L); 27. Total bilirubin (TBIL) ≥ 3 times the ULN; 28. Hemoglobin (Hb) <110 g/L (male) or <100 g/L (female); 29. Calcitonin ≥ 50 ng/L. 30. Presence of significant hematologic disorders (e.g., aregenerative anaemia, myelodysplastic syndromes, etc.), or any disease causing hemolysis or red blood cell instability, or hemoglobinopathies that may affect the measurement of the HbA1c level (e.g., thalassemia, sickle cell anemia, sideroblastic anemia, etc.) 31. Prior history of alcohol or drug abuse (consumption of more than 14 units of alcohol per week [1 unit = 360 mL of beer containing 5% alcohol, 45 mL of spirits containing 40% alcohol, or 150 mL of wine containing 12% alcohol]); 32. Prolonged (≥ 7 consecutive or cumulative days) administration of systemic corticosteroids or growth hormones within 2 months prior to screening (with mode of administration including, but not limited to, intravenous administration, oral administration); 33. Subjects with known or suspected hypersensitivity to GLP-1 analogs or excipients; 34. Use of any investigational drug, vaccine or medical device within 3 months prior to screening; 35. Blood donation or significant blood loss (>400 mL), receipt of blood transfusion or use of blood products within 3 months prior to screening; 36. Female subjects being pregnant or breastfeeding at the time of screening, or subjects (including female partners of male subjects) who have plans for childbearing or sperm and egg donation from within 1 month prior to informed consent to 3 months after the last dose, or subjects of childbearing potential who refuse to use at least one effective contraceptive drug or device; 37. Possibility of failure to complete this study for other reasons, or unsuitable for the study in the opinion of the investigator. | |
| **Investigational Product Information**   - **Ecnoglutide Injection**   Strength: 2.4 mg/1.2 mL/vial;  Storage: Store and transport at 2-8 ℃ away from light and do not freeze.   - **Placebo (Vehicle of Ecnoglutide Injection)**   Strength: Vehicle for injection without Ecnoglutide, 1.2 mL/vial;  Storage: Store and transport at 2-8 ℃ away from light and do not freeze. | |
| **Investigational Product Treatment**  Usage and dosage: The investigational product is administered via subcutaneous injection, once weekly.   - **For subjects randomly assigned to the 1.2 mg Ecnoglutide Injection group (N=70):**   Double-blind core treatment period: A starting dose of 0.3 mg of Ecnoglutide Injection administered for 4 weeks; up-titrate to 0.6 mg administered for 4 weeks; up-titrate to 1.2 mg administered for 16 weeks, for a total of 24 weeks of treatment, with unblinding after the last dose;  Open-label treatment period: Maintenance dose of 1.2 mg for 28 weeks;  The total dosing period is 52 weeks.   - **For subjects randomly assigned to the 1.2 mg volume-matching placebo group (N=35):**   Double-blind core treatment period: A starting dosing volume of 0.15 mL of Ecnoglutide Injection vehicle administered for 4 weeks; up-titrate to 0.3 mL administered for 4 weeks; up-titrate to 0.6 mL administered for 16 weeks, for a total of 24 weeks of treatment, with unblinding after the last dose;  Open-label treatment period: After the unblinding, a starting dose of 0.3 mg of Ecnoglutide Injection administered for 4 weeks; up-titrate to 0.6 mg administered for 4 weeks; up-titrate to 1.2 mg administered for 20 weeks, for a total of 28 weeks of treatment;  The total dosing period is 52 weeks.   - **For subjects randomly assigned to the 0.6 mg Ecnoglutide Injection group (N=70):**   Double-blind core treatment period: A starting dose of 0.3 mg of Ecnoglutide Injection administered for 4 weeks; up-titrate to 0.6 mg administered for 20 weeks, for a total of 24 weeks of treatment, with unblinding after the last dose;  Open-label treatment period: Maintenance dose of 0.6 mg for 28 weeks;  The total dosing period is 52 weeks.   - **For subjects randomly assigned to the 0.6 mg volume-matching placebo group (N=35):**   Double-blind core treatment period: A starting dosing volume of 0.15 mL of Ecnoglutide Injection vehicle administered for 4 weeks; up-titrate to 0.3 mL administered for 20 weeks, for a total of 24 weeks of treatment, with unblinding after the last dose;  Open-label treatment period: After the unblinding, a starting dose of 0.3 mg of Ecnoglutide Injection administered for 4 weeks; up-titrate to 0.6 mg administered for 24 weeks, for a total of 28 weeks of treatment;  The total dosing period is 52 weeks.  **Dose modification criteria**  The predominant adverse reaction of GLP-1 analogs is gastrointestinal intolerance, which can be reduced by adopting the dose titration approach. If a subject develops an intolerable gastrointestinal adverse reaction during the dose titration phase, at the investigator's discretion, the dose may be decreased to the previous tolerated dose and administered for 2 weeks, then increased again in accordance with the protocol, and the treatment will be completed in accordance with the original protocol. If the subject is still intolerant, down-titrate to the previous highest tolerated dose to maintain treatment until completion of the study. | |
| **Salvage Therapy**  T2DM subjects with fasting glucose meeting the following criteria can be treated concomitantly with hypoglycemic agent, which is gradually increased to the maximum prescribed dose (metformin [preferred], see Appendix V for details). In special cases, the investigator may consider the subject's conditions and the clinical diagnosis and treatment routine to determine whether to carry out salvage therapy.   - Weeks 1 to 12: FPG >13.9 mmol/L (250 mg/dL) (determined by two FPG measurements on different days). - Weeks 13 to 57: FPG >11.1 mmol/L (200 mg/dL) (determined by two FPG measurements on different days).   During the course of the study, subjects should undergo FPG retesting if SMBG FPG is found to exceed the above values, or if the investigator finds that FPG exceeds the above values with no apparent causative factors. The status of medication compliance and changes in diet and exercise shall also be checked and adjusted accordingly. FPG retesting is performed after at least 3 days of adjustment to determine whether salvage therapy for hyperglycemia should be performed.  Investigators should document the use of salvage therapies in the original medical record in detail, including the reason for the medication, the dose of the medication, the duration of the medication, and the frequency of the medication. Those subjects who receive salvage therapy during the double-blind core treatment period will be discontinued from study drug upon completion of the double-blind core treatment, and the study is completed after a 5-week safety follow-up period after the last dose. Subjects treated with salvage therapy during the open-label treatment period should continue to attend the visits as specified in the protocol until completion of the clinical study. | |
| **Efficacy Evaluation Endpoints**  **Primary efficacy endpoint:**  Change from baseline in HbA1c as measured by the central laboratory after 24 weeks of treatment.  **Secondary efficacy endpoints:**   - Change from baseline in HbA1c as measured by the central laboratory at each of the other visits; - Proportion of subjects with HbA1c <7% and HbA1c ≤6.5% after 24 and 52 weeks of treatment; - Proportion of subjects with HbA1c <7%, no severe hypoglycemia and no weight gain after 24 weeks of treatment; - Changes from baseline in FPG, fasting insulin, 2 h-postprandial blood glucose (2hPBG), 7-point self-monitoring of blood glucose, homeostatic model assessment of insulin resistance (HOMA-IR), and homeostatic model assessment of β-cell function (HOMA-β) after 24 and 52 weeks of treatment; - Change from baseline in lipids (triglycerides [TG], low-density lipoprotein [LDL], and high-density lipoprotein [HDL]) after 24 and 52 weeks of treatment; - Change from baseline in weight, waist circumference, and hip circumference after 24 and 52 weeks of treatment.   **Safety endpoints:**   - Adverse events (AEs), including treatment-emergent adverse events (TEAEs) and serious adverse events (SAEs), and adverse events of special interest (AESIs, including hypoglycemia, cardiovascular effects, gastrointestinal effects, pancreatitis, and gallbladder-related diseases); - Vital signs (sitting blood pressure [systolic and diastolic], pulse, temperature), physical examination, 12-lead electrocardiogram (ECG); - Clinical laboratory tests (hematology, urinalysis, blood biochemistry, coagulation, thyroid function panel [TSH/FT3/FT4], calcitonin).   **Population pharmacokinetics endpoints:**   - Ctrough: plasma Ecnoglutide concentration before first dose (D1), on D29, D57, D85, D168, D197 (placebo group only), D225 (placebo group only), D253 (placebo group only), D364 before dosing, and on D399 at the end-of-study follow-up.   **Immunogenicity endpoints:**   - The immunogenicity of multiple doses of Ecnoglutide Injection will be investigated based on the formation of anti-Ecnoglutide serum antibodies pre-dose (D1) and at different time points post-dose (D85, D168, D253 [for placebo group only], D399). Positive samples will be further characterized for all in vitro neutralizing activity and cross-reactivity with endogenous GLP-1. | |
| **Sample Size Estimation and Statistical Analysis**  This is a pivotal study to evaluate the efficacy and safety of Ecnoglutide Injection, with the primary efficacy endpoint of changes in HbA1c after 24 weeks of treatment from the baseline. The statistical hypotheses are as follows:   - Null hypothesis H0: *μT-μC*≥ δ (-0.5%); - Alternative hypothesis H1: *μT-μC*< δ (-0.5%).   Where *μT* is the overall mean of the changes from baseline in mean HbA1c in the 1.2 mg Ecnoglutide test group and 0.6 mg Ecnoglutide test group after 24 weeks of treatment, *μ*C is the overall mean of the changes from baseline in HbA1c in the placebo groups pooled together after 24 weeks of treatment, and δ is the superiority cutoff, which is -0.5% in this study.  Sample size estimation:  Assuming that the expected effect difference (ETD) of HbA1c between the Ecnoglutide-1.2 mg or 0.6 mg study group and the placebo group is -1.2%, the standard deviation (SD) is 1.1%, the significance level α is 2.5% (one-sided), the power (1-β) is 90% and subjects are randomly assigned to Ecnoglutide-1.2 mg, 0.6 mg study groups and pooled placebo group at a ratio of 1:1:1, at least 53 subjects required to be enrolled in each group as calculated by the PASS software. Given a dropout rate of approx. 20%, it is planned to enroll 70 subjects in each group, with an overall sample size of 210 subjects.  Definition of the statistical analysis datasets:  **Full Analysis Set (FAS):** Consistent with the definition of the population in the primary estimand, i.e., all subjects who are randomized and have received study drug at least once will be included in the FAS population. Subjects will be grouped based on the treatment they are assigned (Ecnoglutide Injection or placebo), rather than the treatment actually received.  **Safety Set (SS):** Includes all subjects who have been treated at least once with study drug (Ecnoglutide Injection or placebo) and for whom there is a post-dose safety evaluation. SS is mainly used for safety evaluation of drugs and is grouped according to the treatment actually received.  **Population Pharmacokinetic Analysis Set (PopPKS)**: Includes all subjects with at least one post-dose available pharmacokinetic data.  The division of the above-mentioned population will be confirmed after completing cleansing and review of study data and before the database lock, and population division decision will be made. | |
| This study complies with the updated versions of the *Declaration of Helsinki* and the *Good Clinical Practice (GCP)*. | |

1. Clinical study flowchart

| **Schedule of assessments** | **Screening period** | **Run-in period** | | **Double-blind main study period** | | | | | | **Open-label treatment period** | | | | | **Safety follow-up period** | **Early exit** |
| --- | --- | --- | --- | --- | --- | --- | --- | --- | --- | --- | --- | --- | --- | --- | --- | --- |
| Visit points | Scr | V-2 | V-1 | V1 | V2 | V3 | V4 | V5 | V6 | V7 | V8 | V9 | V10 | V11 | V12 |
| Time point (week) |  | -4 | -1 | 1 | 5 | 9 | 13 | 17 | 24# | 29 | 33 | 37 | 45 | 52# | 57 |
| Study days (day) | D-42~-29 | D-28 | D-7 | D1 | D29 | D57 | D85 | D113 | D168 | D197 | D225 | D253 | D309 | D364 | D399 |
| Time window | NA | -7 | ±3 | NA | ±3 | ±3 | ±3 | ±3 | ±3 | ±7 | ±7 | ±7 | ±7 | ±7 | ±7 |
| Informed consent | X |  |  |  |  |  |  |  |  |  |  |  |  |  |  |  |
| Demographic data a | X |  |  |  |  |  |  |  |  |  |  |  |  |  |  |  |
| Past history/treatment history b | X |  |  |  |  |  |  |  |  |  |  |  |  |  |  |  |
| Eligibility evaluation c | X |  |  | X |  |  |  |  |  |  |  |  |  |  |  |  |
| Randomization |  |  |  | X |  |  |  |  |  |  |  |  |  |  |  |  |
| Unblinding |  |  |  |  |  |  |  |  | X |  |  |  |  |  |  |  |
| Vital Signs d | X | X | X | X | X | X | X | X | X | X | X | X | X | X | X | X |
| Physical examination e | X |  |  |  |  |  |  |  | X |  |  |  |  | X | X | X |
| 12-lead ECG | X |  | X |  |  |  | X |  | X |  |  | X |  | X | X | X |
| Viral serology f | X |  |  |  |  |  |  |  |  |  |  |  |  |  |  |  |
| Hematology g | X |  | X |  |  |  | X |  | X |  |  | X |  | X | X | X |
| Urinalysis h | X |  | X |  |  |  | X |  | X |  |  | X |  | X | X | X |
| Blood biochemistry i | X |  | X |  |  |  | X |  | X |  |  | X |  | X | X | X |
| Coagulation function j | X |  | X |  |  |  | X |  | X |  |  | X |  | X | X | X |
| Thyroid function test k | X |  |  |  |  |  |  |  | X |  |  |  |  | X |  | X |
| Calcitonin | X |  |  |  |  |  |  |  | X |  |  |  |  | X |  | X |
| C-peptide | X |  |  |  |  |  |  |  |  |  |  |  |  |  |  |  |
| Blood pregnancy test l | X |  | X |  |  |  |  |  | X |  |  |  |  | X | X | X |
| Urine pregnancy test l |  | X |  |  |  | X |  | X |  |  | X |  | X |  |  |  |
| Glycosylated haemoglobin m | X |  | X |  | X | X | X | X | X | X | X | X | X | X |  | X |
| FPG n | X |  | X |  | X | X | X | X | X | X | X | X | X | X |  | X |
| 2 h-postprandial blood glucose n |  |  | X |  |  |  |  |  | X |  |  |  |  | X |  | X |
| Insulin |  |  | X |  |  |  |  |  | X |  |  |  |  | X |  | X |
| Blood lipids o | X |  | X |  |  |  |  |  | X |  |  |  |  | X |  | X |
| Body measurements p | X |  |  | X | X | X | X | X | X | X | X | X | X | X | X | X |
| Self-monitoring of blood glucose q |  | X | X | X | X | X | X | X | X | X | X | X | X | X |  |  |
| 7-point monitoring of blood glucose r |  |  | X |  |  |  |  |  | X |  |  |  |  | X |  |  |
| PopPK blood sampling |  |  |  | X | X | X | X |  | X | X* | X* | X* |  | X | X | X |
| Immunogenicity sampling |  |  |  | X |  |  | X |  | X |  |  | X* |  |  | X | X |
| Drug dispensing/recovery s |  | X | X | X | X | X | X | X | X | X | X | X | X | X |  | X |
| Administration training t |  | X | X& | X& | X& | X& | X& | X& | X* | X& | X& | X& | X& |  |  |  |
| Diet and exercise instruction u | X | X | X | X | X | X | X | X | X | X | X | X | X | X | X | X |
| Distribution of diary cards v |  | X |  | X | X | X | X | X | X | X | X | X | X | X |  |  |
| Recovery of diary cards v |  |  |  | X | X | X | X | X | X | X | X | X | X | X | X | X |
| Recording of AEs |  | X | X | X | X | X | X | X | X | X | X | X | X | X | X | X |
| Recording of concomitant medications |  | X | X | X | X | X | X | X | X | X | X | X | X | X | X | X |

**Note:**

*: subjects treated with placebo during the double-blind treatment period only; #: 7 days after administration of the drug at the current visit; &: prn (as needed).

@:

1. At screening and prior to randomization, subjects with abnormal test results may be retested by the investigator for specific items in accordance with clinical diagnosis and treatment routines and guidelines. The time of retesting during screening should not extend beyond the screening period (i.e., within 14 days after the signing of informed consent form), and the time of retesting during the run-in period should not extend beyond 10 days after the final follow-up visit of the run-in period. The determination of enrollment review is based on the results of the retest.
2. Subjects who do not receive a randomization number may be re-screened, but will be required to re-sign the informed consent form and undergo all screening procedures. According to the domestic institutional practice, one specific subject can only give informed consent once in one month, and the investigator can suggest the time of next re-screening according to the actual situation. In order to protect the rights and interests of the subjects and the quality of the study, it is stipulated that one specific subject can only be re-screened once in this study, i.e., signing the informed consent form for 2 times at most.
3. Demographics contain the date of birth, sex, and ethnicity;
4. Diagnosed diseases, medical conditions, or medications used prior to first dose;
5. Eligibility evaluation on D1 based on D-7 test results;
6. Vital signs include body temperature, pulse, sitting blood pressure (systolic and diastolic);
7. Physical examination: A comprehensive physical examination will be performed at screening (Scr), V6, V11, V12 and early exit, and appropriate physical examinations will be performed by the investigator during study treatment based on clinical observations and symptoms;
8. Viral serology: Including hepatitis B surface antigen (HBsAg), hepatitis C virus antibody (anti-HCV), and human immunodeficiency virus antibody (anti-HIV) testing; if the HBsAg is positive, additional quantitative HBV DNA assay will be required;
9. Hematology: Including red blood cells (RBC), hemoglobin (HGB), hematocrit (HCT), white blood cell count (WBC), neutrophil count (NEUT), lymphocyte count (LYM), monocyte count (MONO), eosinophil count (EO), basophil count (BASO), platelets (PLT);
10. Urinalysis: Including white blood cells (WBC), red blood cells (RBC), pondus hydrogenii (PH), protein urine (PRO), urine glucose (GLU), urine ketone bodies (KET);
11. Blood biochemistry: Including alanine aminotransferase (ALT), aspartate aminotransferase (AST), alkaline phosphatase (ALP), γ-glutamyltransferas (GGT), total protein (TP), albumin (ALB), total bilirubin (TBIL), direct bilirubin (DBIL), urea (UREA) or urea nitrogen (BUN), creatinine (CR), uric acid (UA), calcium (CA), phosphorus (P), potassium (K), sodium (Na), chloride (CL), amylase (AMY) or lipase (LIP), and cholesterol (TC);
12. Coagulation: Including international normalized ratio (INR), activated partial thromboplastin time (APTT), thrombin time (TT), prothrombin time (PT), and fibrinogen (DFBG);
13. Three items of thyroid function: including thyroid stimulating hormone (TSH), free tri-iodothyronine (FT3) and free tetra-iodothyronine (FT4);
14. For female subjects of childbearing potential only; female subjects who have been menopausal for more than 1 year or permanently sterilized (e.g., bilateral tubal ligation or resection, etc., for at least 6 months) are considered as having no childbearing potential; blood pregnancy tests will be performed at screening (Scr), V-1, V6, V11, V12, and early exit, and urine pregnancy tests will be performed at all other visits; if the urine pregnancy test result is positive or suspected to be positive, or if the subject is menstruating and urine pregnancy test is not feasible, or if urine pregnancy test is not available at the study center, the blood pregnancy test will be performed;
15. Glycosylated hemoglobin (HbA1c) test will be performed by the local laboratory during the screening period, and by the central laboratory at other visits;
16. This visit will require the subjects to be fasted, which is defined as not having food or drink, except water, for at least 8 h. Concomitant medications may be used before fasting, but hypoglycemic agents are not allowed. Meals will be uniformly provided after sample collection, and 2hPBG samples will be collected according to the flow chart; if the subject is not fasted at this visit, non-fasting assessments can be performed, and the fasting items will be examined as far as possible within the visit window;
17. Lipids: Including triglycerides (TG), high-density lipoprotein (LDL), and low-density lipoprotein (HDL);
18. Body measurements: Including weight (accurate to 0.1 kg), barefoot height (accurate to 0.1 cm, measured at screening only), waist circumference (accurate to 0.1 cm) and hip circumference (accurate to 0.1 cm). All measurements will be repeated twice and the mean will be recorded in the electronic Case Report Form (eCRF). Refer to the Appendix for detailed description of measurements;
19. Self-monitoring of blood glucose: Blood glucose meters will be distributed at V-2, and subjects will be advised to perform FPG monitoring in the morning for at least 3 times per week on different days during the clinical study and record the results in the diary card;
20. 7-point monitoring of blood glucose: Subjects will be asked to measure their 7-point blood glucose (within 30 min before breakfast, 2 h±30 min after breakfast, 30 min before lunch, 2 h±30 min after lunch, 30 min before dinner, 2 h±30 min after dinner, and within 1 h before bedtime) at home on any day during the corresponding visit window, and to record the results in the diary card at the same time;
21. Sufficient investigational drug will be dispensed at each visit for use before the next visit; the unused drugs shall be brought back at the next visit, as detailed in the Drug Management Manual. Subjects who receive salvage therapy during the double-blind core treatment period will be discontinued from the investigational drug upon completion of the double-blind core treatment, and the investigational drug will be recovered at the V6 visit;
22. The first dose of the investigational drug will be administered by the study staff by subcutaneous injection at the study center, who will train the subjects on drug administration method, and provide video and graphic materials to help the subjects complete the self-administration during the subsequent treatment period. If needed, the subject may go to the study center and have the medication administered by the study staff, or administer the medication under the direction of the study staff, or undergo re-training. After completing the double-blind core treatment period, subjects receiving placebo will enter the open-label treatment period and begin dose-titration administration, these subjects must be re-trained to ensure medication accuracy;
23. Diet and exercise instruction: The investigator advises subjects on diet and exercise in accordance with the study center's regulations, and the instructions need to be reinforced if the subjects have inappropriate habits (e.g., binge eating) (refer to Appendix IV for diet and exercise instruction);
24. After the first dose of the drug, the diary card will be distributed at each follow-up visit, and subjects will be instructed to fill in the diary card, including adverse events, concomitant medications, blood glucose monitoring, and medication administration records, etc.; at the next follow-up visit, the subjects should bring back to the site the diary card of the previous cycle, and the investigator will enter the corresponding data according to the records in the diary card of the subject, and provide appropriate guidance and advice to the subject.

1. Study background
   1. Introduction

Type 2 diabetes mellitus (T2DM) is a chronic, metabolic disease with elevated blood glucose levels mainly due to insufficient insulin secretion and/or insulin resistance, and is the most common type of diabetes. The prevalence of diabetes mellitus in China reached 11.2% during the period from 2015 to 2017, of which T2DM accounts for more than 90% [1]. According to the 10th edition of the *Statistical Yearbook Report* published by the International Diabetes Federation (IDF) in November 2021[2], China has 141 million patients with diabetes mellitus, accounting for about a quarter of the total number of patients worldwide (537 million); the number of deaths is as high as 1.4 million, ranking first in the Western Pacific region, and the related medical expenditure is only second to the United States, reaching $165.3 billion. About half of the diabetic patients in China are undiagnosed, and diabetes not diagnosed or not properly treated can lead to a series of serious and life-threatening complications, such as myocardial infarction, stroke, renal failure, blindness, amputation, dementia, and even malignant tumors.

Dietary control and physical exercise are usually the backbone therapy for T2DM. If dietary control and physical exercise therapy are still insufficient to lower blood glucose, drug therapy can be chosen according to the patient's specific situation. A variety of antidiabetic drugs have been approved for the treatment of T2DM patients in China, including metformin, sulfonylureas, α-glucosidase inhibitors, dipeptidyl peptidase 4 (DDP-4) inhibitors, glucagon-like peptide 1 (GLP-1) receptor agonists and insulin, etc. These drugs exert their efficacy by promoting insulin secretion, improving insulin utilization by peripheral tissues, or based on other mechanisms. Metformin is currently the first-line drug recommended by international guidelines and many national clinical guidelines. However, for many antidiabetic drugs including metformin, the monotherapy usually fails to achieve the target level of glycosylated hemoglobin (HbA1c) [1]. Nearly 50% of diabetic patients require the addition of a second antidiabetic drug after metformin monotherapy. Therefore, there is an urgent clinical need to develop novel antidiabetic drugs with different mechanisms of action, which can be used as monotherapy or in combination with other antidiabetic drugs, and GLP‑1 analogs have emerged as highly promising candidates for the treatment of diabetes mellitus and related diseases.

Ecnoglutide is an acylated analog of human GLP-1 developed by Hangzhou Sciwind Biosciences Co., Ltd. The clinical study application of this product has been approved by CDE for three indications, i.e., T2DM, weight management and NASH in adults, with approval numbers of 2020LP00756 (T2DM), 2020LP00753 (weight management) and 2021LP00230 (NASH). As a peptide hormone secreted by human intestinal mucosal L cells, natural GLP-1 stimulates insulin secretion and inhibits glucagon secretion in a glucose-dependent manner. GLP-1 can also delay gastric emptying and reduce appetite and energy intake. Available clinical data indicate that the elimination half-life (t1/2) of a single dose of Ecnoglutide Injection in both healthy and diabetic subjects is approx. 4-7 days, supporting a once-weekly dose regimen, and proof-of-concept studies have shown that Ecnoglutide Injection is effective in controlling blood glucose compared to the placebo in both cases, with certain weight management benefits.

- 1. Summary of Nonclinical and Clinical Studies

Extensive nonclinical safety evaluations and clinical studies have been conducted on Ecnoglutide Injection, as described in detail in the Investigator’s Brochure (IB) of Ecnoglutide Injection [3].

- - 1. Nonclinical pharmacology and pharmacodynamics

In the hypoglycemic and weight-reducing efficacy test in T2DM model KKAy mice (10 mice in each group), Ecnoglutide Injection was subcutaneously administered at 0.005 to 0.05 mg/kg once daily for 28 consecutive days, which significantly reduced the FPG, postprandial blood glucose and HbA1c in KKAy mice, improved oral glucose tolerance and insulin tolerance, and inhibited weight gain in these mice in an obviously dose-dependent manner. In the test with T2DM model db/db male mice (n = 10 per group), subcutaneous injection of Ecnoglutide at 0.005 to 0.05 mg/kg once daily for 42 consecutive days resulted in statistically significant (P ≤ 0.05, compared with the control group) decreases in HbA1c, adipose tissue weight, and body weight in db/db male mice in an obviously dose-dependent manner. Ecnoglutide Injection significantly improved the obesity symptoms of model animals, and at the same dose, the improving effect was significantly better than the active comparator drug (Semaglutide Injection 0.05 mg/kg). The effects of Ecnoglutide Injection on appetite suppression and weight decrease were evaluated in an obesity model of cynomolgus monkey and compared with semaglutide. At all dose levels (0.005 mg/kg, 0.015 mg/kg, or 0.045 mg/kg), the food consumption in semaglutide group and Ecnoglutide Injection group was significantly lower than that in the vehicle group (P < 0.01 or P < 0.001) and the degree of reduction in food consumption increased with dose increase. At the same dose, the food consumption decrease in the Ecnoglutide Injection group was significantly greater than that in the semaglutide group (P < 0.001).

- - 1. Nonclinical safety pharmacology

Safety pharmacology studies in rats and cynomolgus monkeys with over-expressed human ether-a-go-go related gene (hERG) channels showed that Ecnoglutide had no impact on the respiratory system, central nervous system and cardiovascular system.

- - 1. Toxicological studies

In the long-term toxicology studies lasting for 26 consecutive weeks, the NOAELs in SD rats and cynomolgus monkeys were 0.4 mg/kg/d and 0.10 mg/kg/dose, respectively. In the Salmonella typhimurium and Escherichia coli Ames tests, the in vitro chromosomal aberration assay using Chinese hamster ovary cell line, and the micronucleus assay using mouse bone marrow cells, the results were all negative. When investigating the general toxicities, the NOAEL of Ecnoglutide Injection in male and female SD rats was 0.09 mg/kg/d. When investigating the reproductive toxicities (fertility and early embryonic development to implantation), the NOAEL of Ecnoglutide Injection was 0.09 mg/kg/d in male SD rats and 0.03 mg/kg/d in female SD rats. The NOAEL of Ecnoglutide Injection was 0.05 mg/kg/d for dams. The NOAEL for embryo-fetal development was 0.01 mg/kg/day. The Segment II reproductive toxicity study of Ecnoglutide in New Zealand rabbits by repeated subcutaneous injection showed that the NOAEL of Ecnoglutide Injection was 1 µg/kg for embryo-fetal development. No sensitization or related irritant changes were observed in the active systemic anaphylaxis test in Hartley guinea pigs, the passive skin sensitization test in rats, or the local irritation test in New Zealand rabbits.

- - 1. Clinical studies

As of August 31, 2022, healthy subjects have been enrolled in 4 Phase I studies (SCW0502-1011, SCW0502-1012, SCW0502-1013, SCW0502-1015), and subjects with target indications have been enrolled in 2 Phase II studies and 1 Phase I study. Based on the actual exposure data of completed clinical studies and the enrollment plans/randomization protocols of ongoing clinical studies, a total of 573 subjects have been exposed to Ecnoglutide, placebo comparator and active comparator, including 451 subjects exposed to Ecnoglutide and 122 subjects exposed to placebo comparator and active comparator. The maximum dose was 2.4 mg, and the maximum dosing period was 26 weeks.

The current study showed that Ecnoglutide Injection was well tolerated, and the AEs related or possibly related to the investigational product were gastrointestinal intolerance events, i.e., nausea, constipation, vomiting, abdominal discomfort, gastroesophageal reflux and decreased appetite, mostly mild to moderate. Consistent with the known pharmacological action of GLP-1, the AEs showed a dose-dependent trend, which could be ameliorated by low-dose titration, showing good tolerability and safety. The results of immunogenicity test were negative for all subjects in each study.

Studies conducted in Chinese T2DM patients showed that the reduction of HbA1c in Ecnoglutide groups was significantly greater than that in the placebo group (P<0.0001), which indicated a dose-dependent relationship. Ecnoglutide also significantly reduced the FPG, self-monitoring FPG (three times a week on different days), mean 7-point self-monitoring of blood glucose, body weight and other indexes, and showed a similarly dose-dependent relationship. Ecnoglutide also reduced glucagon, waist circumference, hip circumference, LDL, and other indexes to a certain extent. The interim data of Ecnoglutide in overweight and/or obese subjects showed significant effect on weight loss; in addition, Ecnoglutide significantly reduced BMI, waist circumference, hip circumference, waist-to-hip ratio, glycosylated hemoglobin, blood glucose, and insulin at some time points.

**Table 3. Summary of Exposures to the Investigational Product (as of August 31, 2022)**

| **Protocol No.** | **Phase** | **Study population** | **No. of subjects** | **Exposure to Ecnoglutide** | **Maximum dose of Ecnoglutide** | **Maximum dosing period of Ecnoglutide** |
| --- | --- | --- | --- | --- | --- | --- |
| #SCW0502-1011 | Phase I | Healthy subjects | 36 | 27 | 0.8 mg | Single dose |
| #SCW0502-1012 | Phase I | Healthy subjects | 28 | 23 | 0.6 mg | 6 weeks |
| #SCW0502-1013 | Phase I | Healthy subjects | 50 | 39 | 1.2 mg | 10 weeks |
| #SCW0502-1014 | Phase I | Obese/overweight subjects | 60 | 50 | 2.4 mg | 26 weeks |
| #SCW0502-1015 | Phase I | Healthy subjects | 48 | 48 | 0.4 mg | Single-dose, 2-cycle (crossover) |
| #SCW0502-1021 | Phase II | T2DM patients | 145 | 109 | 1.2 mg | 20 weeks |
| #SCW0502-1121 | Phase II | Obese subjects | 206 | 155 | 2.4 mg | 26 weeks |
| Total | − | − | 573 | 451 | 2.4 mg | 26 weeks |

- 1. Summary of Potential Risks and Benefits

No serious adverse events (SAEs) related to the investigational drug were identified in the currently available early studies in healthy individuals and patients with T2DM, only one severe adverse event (AE) (decreased appetite) occurred in a healthy individual at a single dose of 0.8 mg. In an overseas Ecnoglutide monotherapy study in non-diabetic obese patients, one subject in the Ecnoglutide group and one subject in the liraglutide group separately reported one SAE possibly related to the drug, which was acute cholecystitis, with the outcome of "recovered". The main treatment-emergent adverse event (TEAE) identified so far was gastrointestinal intolerance, with a dose-dependent trend in incidence, which recovered after symptomatic treatment and discontinuation of the study drug; it was considered to be a known pharmacologic effect of GLP-1. In most patients who developed gastrointestinal intolerance at the beginning of treatment, the frequency and severity of symptoms decreased after continued treatment and improved with low-dose titration. Abnormalities in laboratory monitoring, such as blood glucose, pancreatic enzymes, hepatic and renal functions, were mostly sporadic, not significantly correlated with the investigational drug, and not dose- or time-dependent. No unpredicted preclinical safety risks of Ecnoglutide have been identified, nor have any safety risks been reported in pre-marketing and post-marketing studies of similar products.

T2DM is a global disease burden, which is more prominent in the Chinese population. Untreated or inadequately controlled T2DM can lead to a variety of acute and chronic complications, disability and even death. As a good choice for the treatment of T2DM, GLP-1 analogs are currently approved for the treatment of T2DM in China, and approved internationally for managing obesity and high-risk overweight, and a Phase III pivotal study on the treatment of non-cirrhotic NASH is underway. Potent, long-acting GLP-1 analogs can effectively control the above diseases and improve the medication compliance of the patients, further improving efficacy and safety and providing long-term clinical benefits.

Overall, the benefits of this product outweigh the risks, which supports the planned clinical studies.

- 1. Rational for the Selection of Dosage and Study Period

1. Rational for dosage selection

The least squares mean (standard error) [LSM (SEM)] of the change from baseline (CFB) in HbA1c at 20 weeks of treatment as the primary efficacy endpoint of Ecnoglutide in OAD (oral antidiabetic drug)-treatment-naïve/washed-out T2DM patients was -2.39% (0.15%) in the Ecnoglutide 1.2 mg group, -1.90% ( 0.15%) in the 0.8 mg group, -1.81% (0.15%) in the 0.4 mg group, and -0.55% (0.15%) in the placebo group, respectively, which was superior in the active drug dose groups to the placebo group, and superior in the 1.2 mg group to the 0.8 and 0.4 mg groups. The secondary efficacy endpoints (fasting glucose (FPG), 7-point self-monitoring of blood glucose (SMBG), and CFB in body weight) showed the same trend. The safety and tolerability of Ecnoglutide 1.2 mg QW was comparable to that of 0.8 and 0.4 mg QW, with an acceptable incidence of discontinuation and/or study exit. Therefore, 1.2 mg QW was selected as the primary maintenance dose for the Phase III pivotal study in OAD treatment-naïve/washed-out patients (titrated administration at 0.3 mg QW for 4 weeks and further at 0.6 mg QW for 4 weeks). In addition, when using the randomized dose as the exposure variable and the CFB in HbA1c at 20 weeks of treatment as the efficacy variable, a quantitative pharmacology model of Emax exposure-response (E-R) was established, which predicted a CFB of -2.0% at 20 weeks of treatment at the Ecnoglutide dose level of 0.6 mg QW (predicted value [observed value], 1.2 mg: -2.2% [-2.4%], 0.8 mg: -2.1% [-2.1%], and 0.4 mg: -1.9% [-1.8%]). The predicted efficacy of 0.6 mg QW is up to 77.7% of Emax, suggesting that a good glycemia control rate can be achieved. The safety and tolerability (e.g., gastrointestinal intolerance and decreased appetite) are expected to be improved compared with 1.2 mg; and the maintenance dose can be reached simply by titration from 0.3 mg for 4 weeks, which is more convenient for clinical use with better treatment compliance. Therefore, 0.6 mg was also selected as a target dose for the Phase III clinical study in OAD treatment-naïve/washed-out patients.

1. Rational for Selection of Study Period

The run-in period is mainly designed to investigate the stability of parameters such as HbA1c in order to accurately evaluate the efficacy of the drug and to preliminarily assess subject compliance. The target population for this study is subjects who have not received hypoglycemic agents before screening, or who have used hypoglycemic agents but have not received them within 2 weeks prior to screening, and a 4-week placebo run-in period is set to obtain stable HbA1c parameters at baseline. Meanwhile, in the 4-week run-in period, subjects will be provided with diabetic diet and exercise guidance, and their compliance will be assessed to further determine the eligibility of their participation in the study.

According to the *Technical Guidelines for Clinical Research and Development of Drugs for Adults with T2DM (Draft for Comment)* issued by the Center for Drug Evaluation of NMPA, Phase III clinical studies should be randomized, controlled studies lasting for at least six months, followed by extended studies lasting for six months or longer, so as to evaluate the efficacy and safety of the novel drugs over the long term. However, due to the ethical issues that may arise from long-term placebo treatments, it's recommended that the placebo group be treated for no more than 6 months. Therefore, the placebo-controlled double-blind core treatment period will be set at 24 weeks in this study. After completing the 24-week double-blind core treatment period, subjects will enter the open-label treatment period, where the subjects in the test groups continue to be treated with the corresponding investigational drug until Week 52, and those who have been treated with the placebo will be switched to receive the investigational drug until Week 52, and a 5-week safety follow-up is planned for all subjects after completing the 52-week treatment.

In conclusion, the study period design of this study can meet the requirements for long-term efficacy and safety observation of novel hypoglycemic drugs.

1. Study objectives, study endpoints and estimands
   1. Study Objectives
      1. Primary objective

- To evaluate the efficacy of Ecnoglutide Injection administered for 24 weeks in adult subjects with T2DM.
  - 1. Secondary objectives
- To evaluate the efficacy of Ecnoglutide Injection administered for 52 weeks in adult subjects with T2DM.
- To evaluate the safety of Ecnoglutide Injection administered for 24 weeks and 52 weeks in adult subjects with T2DM.
- To evaluate the population pharmacokinetics of Ecnoglutide Injection administered in adult subjects with T2DM.
- To evaluate the immunogenicity of Ecnoglutide Injection administered in adult T2DM subjects.
  1. Endpoints
     1. Efficacy evaluation endpoints

**Primary efficacy endpoint:**

- Change from baseline in HbA1c as measured by the central laboratory after 24 weeks of treatment.

**Secondary efficacy endpoints:**

- Change from baseline in HbA1c as measured by the central laboratory at each of the other visits;
- Proportion of subjects with HbA1c <7% and HbA1c ≤6.5% after 24 and 52 weeks of treatment;
- Proportion of subjects with HbA1c <7%, no severe hypoglycemia and no weight gain after 24 weeks of treatment;
- Changes from baseline in FPG, fasting insulin, 2hPBG, 7-point blood glucose, homeostatic model assessment of insulin resistance (HOMA-IR), and homeostatic model assessment of β-cell function (HOMA-β) after 24 and 52 weeks of treatment;
- Change from baseline in lipids (triglycerides [TG], low-density lipoprotein [LDL], and high-density lipoprotein [HDL]) after 24 and 52 weeks of treatment;
- Change from baseline in weight, waist circumference, and hip circumference after 24 and 52 weeks of treatment.
  - 1. Safety endpoints
- Adverse events (AEs), including treatment-emergent adverse events (TEAEs) and serious adverse events (SAEs), and adverse events of special interest (AESIs, including hypoglycemia, cardiovascular effects, gastrointestinal effects, pancreatitis, and gallbladder-related diseases);
- Vital signs (sitting blood pressure [systolic and diastolic], pulse, body temperature), physical examination, 12-lead ECG;
- Clinical laboratory tests (hematology, urinalysis, blood biochemistry, coagulation, thyroid function panel [TSH/FT3/FT4], calcitonin).
  - 1. Population pharmacokinetics endpoints
- Ctrough: plasma Ecnoglutide concentration before first dose (D1), on D29, D57, D85, D168, D197 (placebo group only), D225 (placebo group only), D253 (placebo group only), D364 before dosing, and on D399 at the end-of-study follow-up.
  - 1. Immunogenicity endpoints
- The immunogenicity of multiple doses of Ecnoglutide Injection will be investigated based on the formation of anti-Ecnoglutide serum antibodies pre-dose (D1) and at different time points post-dose (D85, D168, D253 [for placebo group only], D399). Positive samples will be further characterized for all in vitro neutralizing activity and cross-reaction to endogenous GLP-1.
  1. Estimand
     1. Primary estimand

The primary clinical focus of interest in this study is the inter-group difference of mean change from baseline in HbA1c in each test group versus the placebo group after 24 weeks of weekly treatment with Ecnoglutide Injection (0.6 mg or 1.2 mg) or placebo in adult patients with T2DM who do not achieve the desired level of control after 8 weeks of nutrition and exercise interventions, regardless of whether there is early termination of treatment or salvage therapy. The specific definition of the primary estimand is as follows:

- - - 1. Population

All patients with T2DM who are randomized and treated with Ecnoglutide Injection or placebo for at least once.

- - - 1. Treatment

Subjects enrolled and randomized will be sequentially treated with 24 weeks of double-blind treatment and 28 weeks of open-label treatment. Specifically, subjects randomly assigned to the 0.6 mg or 1.2 mg Ecnoglutide Injection group will be administered according to their respective dose titration schedules, once weekly for a planned treatment period of 52 weeks; whereas subjects randomly assigned to the 0.6 mg or 1.2 mg placebo group will be administered according to their respective matching volumes once weekly, and after the 24-week double-blind treatment, they will be switched to the corresponding 0.6 mg or 1.2 mg Ecnoglutide Injection group to receive the 28-week open-label treatment, as detailed in Chapter 11 of the protocol.

Hypoglycemic therapy, weight-reducing therapy, and systemic glucocorticoid/growth hormone therapy other than the salvage therapy are not permitted during the treatment period. Regardless of whether there is early termination of treatment or salvage therapy (Subjects who receive salvage therapy during the double-blind core treatment period will be discontinued from study drug upon completion of the double-blind core treatment, and the study is completed after a 5-week safety follow-up period after the last dose. Subjects treated with salvage therapy during the open-label treatment period should continue to attend the visits as specified in the protocol until completion of the clinical study), the subjects should be followed up until the end of the safety follow-up period.

- - - 1. Variable

Change from baseline in HbA1c after 24 weeks of treatment as measured by the central laboratory (post-treatment value - baseline value).

- - - 1. Intercurrent events and processing strategies

It is anticipated that the following intercurrent events may occur during the course of the study, and their definitions and processing strategies are described below:

| **Intercurrent event** | **Processing strategy** | **Rational or consideration** |
| --- | --- | --- |
| A. Early termination of treatment for any reason | **Treatment policy strategy**  Continue the follow-up after early termination of treatment and include the data in the analysis | Compliant with clinical practice. This study focuses on the treatment effects regardless of whether the treatment is terminated early or not. |
| B. Salvage therapy | **Treatment policy strategy**  Continue the follow-up after the salvage therapy and include the data in the analysis | Compliant with clinical practice. This study focuses on the treatment effects of study drug + salvage therapy |

- - - 1. Population-level summary

Mean change from baseline in HbA1c as measured by the central laboratory after 24 weeks of treatment for each treatment group and its 95% confidence interval (CI); the inter-group difference of the mean values in each Ecnoglutide dose group versus the placebo group and its two-sided 95% CI.

- - 1. Secondary estimand 1

This study also focuses on the inter-group difference of mean change from baseline in HbA1c in each test group versus the placebo group after 24 weeks of weekly treatment with Ecnoglutide Injection (0.6 mg or 1.2 mg) or placebo in adult patients with T2DM without any salvage therapy. For the intercurrent event (salvage therapy), the hypothetical strategy will be adopted, and the data after the occurrence of intercurrent events will not be included in the analysis. In statistical analysis, it’s assumed that the subjects receiving salvage therapy are similar to the subjects with similar baseline characteristics in the same treatment group without salvage therapy, and the HbA1c level after salvage therapy will be predicted according to the data of the latter subjects, and then included in the analysis. Other attributes are consistent with those of the primary estimand.

- - 1. Secondary estimand 2

As supportive analysis for the primary estimand, the secondary estimand 2 in this study is established with the change from baseline in FPG after 24 weeks of treatment, the change from baseline in weight after 24 weeks of treatment, and the percent changes as the target variables. The population, treatment attributes, and processing strategies for intercurrent events of this estimand are the same as those of the primary estimand, only the target variables and the estimates in the population-level summary are replaced with the corresponding change from baseline in FPG or weight after 24 weeks.

1. Study Plan
   1. Overall Study Design

This study is a multi-center, randomized, double-blind, placebo-controlled Phase III clinical study, which aims at evaluating the efficacy, safety and immunogenicity of Ecnoglutide Injection in adult type 2 diabetes mellitus patients with poor glycemic control after nutrition and exercise interventions.

A total of 210 subjects are planned to be enrolled, and those who meet the inclusion criteria and do not meet the exclusion criteria will be stratified by baseline glycosylated hemoglobin (HbA1c) (≤8.5% and >8.5%) and randomly assigned (2:2:1:1) to the following groups: the 1.2 mg dose group of Ecnoglutide Injection (N=70), the 0.6 mg dose group of Ecnoglutide Injection (N=70), the 1.2 mg Ecnoglutide volume-matching placebo group (N=35) and the 0.6 mg Ecnoglutide volume-matching placebo group (N=35); the two placebo control groups will be pooled for statistical analyses (N=70).

The study process consists of a 2-week screening period, a 4-week run-in period, a 24-week double-blind core treatment period, a 28-week open-label treatment period and a 5-week safety follow-up period, that is, a total of 63 weeks. The study design is detailed in Figure 1.


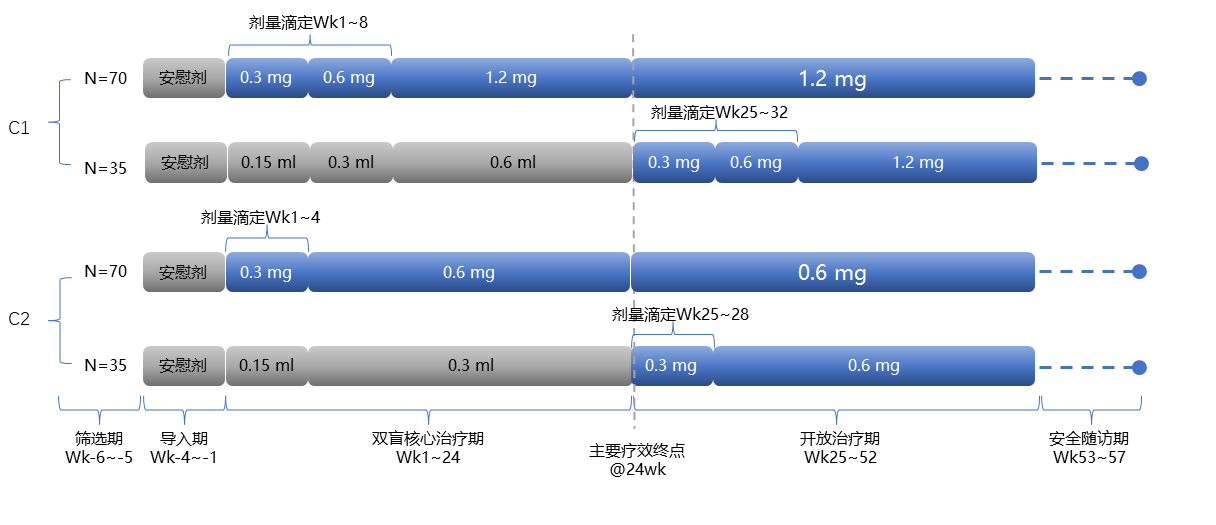


Dose titration Wk1~8

Dose titration Wk1~4

Dose titration Wk25~32

Dose titration Wk25~28

Placebo

Placebo

Placebo

Placebo

Screening period

Run-in period

Double-blind main study period

Primary efficacy endpoints

Open-label treatment period

Safety follow-up period

Figure 1. Schematic Diagram of the Study Design

- 1. Number of Subjects

This study plans to enroll 210 adult T2DM subjects.

- 1. Treatment Assignment
     1. Randomization

The randomization scheme will be prepared by the randomization statistician using the SAS 9.4 statistical software package (or higher version). The stratified randomization method is used with HbA1c level (≤ 8.5%, > 8.5%) as the stratification factor, and sufficient randomization processing numbers are generated simultaneously. The seed number and randomization procedure for generating the randomization schedule will be stored together with the randomization list in sealed package.

In this study, the central randomization system will be used for subject randomization and drug dispensing management. The final randomization scheme will be loaded into the central randomization system, which will be configured and go live before the study is initiated.

After the informed consent is documented, a unique screening number will be assigned to each subject. Subjects will be reviewed for eligibility at screening and after the run-in period and were assigned a randomization number before the first dose after deemed eligible for enrollment. The format for screening numbers is S##-xxx, where ## represents the site number, and xxx represents a three-digit number starting from 001. For example, S01-001 represents the first subject screened at Site 01. Upon the completion of all screening assessments to determine whether the subjects meet the inclusion criteria and do not meet the exclusion criteria, the eligible subjects will be given a randomization number. The format of randomization numbers is as follows: C1xxx, the first digit is capital letter C, the second digit is the cohort, 1 represents the first cohort (1.2 mg of Ecnoglutide Injection or matching volume of placebo), 2 represents the second cohort (0.6 mg of Ecnoglutide Injection or matching volume of placebo), and xxx represents three-digit randomization code. For randomized subjects who exit from the clinical study due to any reason, whether or not the investigational product is taken, their randomization number will be retained, and they will not be allowed to enter the study again.

Subjects who exit from the study for any reason without completing all necessary screening assessments will be considered screen failures. Subjects who fail screening will not be assigned with the randomization number. Subjects who do not receive a randomization number may be re-screened, but will be required to re-sign the informed consent form and undergo all screening procedures.

- - 1. Blind setting

An open-label design will be adopted for the run-in period and the open-label treatment period of this study.

The double-blind core treatment period will adopt a double-blind design, where the sponsor, subjects, investigators, monitors and data analysts will remain blinded, and none of the blinded personnel are aware of the subject's specific treatment assignment during the course of the study.

- - - 1. Allocation concealment

The investigational drug and placebo provided by the sponsor have the same appearance and weight and cannot be distinguished by naked eyes.

The on-site drug blinding will be performed by randomization personnel and personnel not involved in this study who are designated by the sponsor, where the study drugs (including investigational drug and control drug) will be labeled and numbered according to the randomly generated drug numbers. Blinding records will be formed during blinding process and preserved.

Except for unblinding specified in the protocol, the blind codes shall be kept intact during the study, and any damage that occurred before unblinding of the study will be regarded as unblinding.

- - - 1. Emergency unblinding

An electronic emergency envelope is prepared for each subject via a central randomization system and only authorized study personnel will be permitted to open it. Emergency unblinding may be performed by the investigator in the randomization system when the subject experiences a serious adverse event or is in urgent need of rescue, and the sponsor shall be notified immediately. The investigator shall record the reason, date and result of emergency unblinding in detail. The subject shall be exited from the study following emergency unblinding.

- - - 1. Unblinding provisions

This study adopts a single-subject unblinding design, i.e., after each subject completes 24 weeks of double-blind treatment, the treatment group corresponding to the randomization number is revealed, so as to assign the corresponding dose regimen for the open-label treatment period.

1. Subject selection, dropout and study discontinuation
   1. Inclusion Criteria

**Subjects must meet all of the following inclusion criteria to be included in this study:**

1. Male or female, aged 18 to 75 years old (inclusive) when signing the informed consent;
2. Body mass index (BMI) ≥ 20.0 kg/m2 and ≤ 35.0 kg/m2;
3. Meet the Diagnostic Criteria for Diabetes Mellitus promulgated by the World Health Organization (WHO) in 1999, have been diagnosed with T2DM for at least 3 months and received nutrition and exercise interventions for 8 weeks prior to screening, and meet one of the following criteria:
4. No use of any hypoglycemic agents in the previous 12 weeks, or
5. Use of only one oral hypoglycemic agent within the previous 12 weeks, but no further use within 2 weeks prior to screening;
6. HbA1c ≥ 7.5% and ≤ 11.0% at screening (local laboratory) and HbA1c ≥ 7.0% and ≤ 10.5% before randomization (central laboratory);
7. Fasting plasma glucose (FPG) ≤ 13.9 mmol/L at screening and pre-randomization (local laboratory);
8. Willing and able to perform self-monitoring of blood glucose (SMBG) and record diary cards on time;
9. Fully understand the study objectives, able to communicate well with the investigator, and able to understand and comply with the requirements set forth for this study.
   1. Exclusion Criteria

**Subjects must be excluded from the study if they meet *any* of the following criteria:**

1. Prior diagnosis of type 1 diabetes mellitus or other types of diabetes mellitus;
2. Use of GLP-1 analogs or DPP-4 inhibitors within 3 months prior to screening;
3. Use of any insulin preparation within 6 months prior to screening (except for short-term insulin therapy related to complications, i.e., total treatment duration ≤ 14 days);
4. History of diabetic ketoacidosis (DKA), hyperosmolar hyperglycemic state (HHS) and diabetic lactic acidosis (DLA) within 6 months prior to screening;
5. Presence of severe chronic complications of diabetes mellitus (e.g., proliferative retinopathy or macular degeneration, severe diabetic neuropathy, diabetic foot, etc.) within 6 months prior to screening;
6. Confirmed or suspected grade 3 hypoglycemia episodes within 6 months prior to screening, or 2 or more hypoglycemia episodes (blood glucose < 3.9 mmol/L) within 1 month prior to screening;
7. History of severe trauma or serious infection or surgery that may affect glycemic control within 1 month prior to screening;
8. History of uncontrolled hyperthyroidism or hypothyroidism, except those subjects who have received stable dose of thyroid replacement therapy for at least 3 months prior to screening and whose thyroid function test results (thyroid-stimulating hormone [TSH]/free tri-iodothyronine [FT3]/free tetra-iodothyronine [FT4]) are in the normal range;
9. Prior personal or family history of medullary thyroid carcinoma (MTC) or multiple endocrine neoplasia syndrome type 2 (MEN2);
10. Medical or non-medical weight management, including unapproved weight management medications or products, within 3 months prior to screening, or a change in body weight of more than 5% (as self-reported by the subject) within 3 months prior to screening;
11. Prior history of significant cardiovascular disease, defined as:
12. History of myocardial infarction, coronary angioplasty or bypass grafting, heart valve disease or heart valve repair surgery, clinically significant unstable arrhythmia, unstable angina, transient ischemic attack, or cerebral vascular accident within 6 months prior to screening;
13. Congestive heart failure with a New York Heart Association (NYHA) classification of class III or IV (see Appendix VII);
14. Comorbid poorly controlled respiratory diseases, including but not limited to chronic obstructive pulmonary disease, bronchial asthma, and active tuberculosis, within 6 months prior to screening;
15. History of severe gastrointestinal disease (e.g., active ulcers) or gastrointestinal surgery (other than appendectomy or cholecystectomy) or clinically significant gastric emptying abnormalities (e.g., pyloric obstruction, gastroparesis) or chronic use of medications that have a direct effect on gastrointestinal motility within 6 months prior to screening;
16. Prior history of acute and chronic pancreatitis, symptomatic gallbladder disease, pancreatic injury and other factors that may contribute to a high risk of pancreatitis;
17. Prior diagnosis of malignant tumor (except cured basal cell carcinoma of the skin or carcinoma in situ of the cervix) within 5 years;
18. Pre-existing uncontrolled psychiatric and neurological disorders;
19. Positive hepatitis B surface antigen [HBsAg] (except for those with quantitative hepatitis B virus [HBV] deoxyribonucleic acid [DNA] test results below the lower limit of the reference range of the assay), or positive hepatitis C virus [HCV] antibody, or positive human immunodeficiency virus [HIV] antibody at the time of screening;
20. Screening or pre-randomization test results meeting any of the following criteria:
21. Uncontrolled hypertension: systolic blood pressure ≥160 mmHg and/or diastolic blood pressure ≥ 100 mmHg;
22. Liver disease or impaired liver function, such as alanine aminotransferase (ALT) or aspartate aminotransferase (AST) ≥ 2.5 times the upper limit of normal (ULN);
23. Impaired pancreatic function, with blood amylase or blood lipase ≥ 1.5 times the ULN;
24. Impaired renal function, i.e., estimated glomerular filtration rate (eGFR) ≤ 45 mL/min/1.73 m2 (Modification of Diet in Renal Disease [MDRD] equation);
25. Dyslipidemia, such as fasting triglycerides (TG) > 5.65 mmol/L;
26. Fasting C-peptide < 0.8 ng/mL (or 0.26 nmol/L);
27. Total bilirubin (TBIL) ≥ 3 times the ULN;
28. Hemoglobin (Hb) <110 g/L (male) or <100 g/L (female);
29. Calcitonin ≥ 50 ng/L;
30. Presence of significant hematologic disorders (e.g., aregenerative anaemia, myelodysplastic syndromes, etc.), or any disease causing hemolysis or red blood cell instability, or hemoglobinopathies that may affect the measurement of the HbA1c level (e.g., thalassemia, sickle cell anemia, sideroblastic anemia, etc.);
31. Prior history of alcohol or drug abuse (consumption of more than 14 units of alcohol per week [1 unit = 360 mL of beer containing 5% alcohol, 45 mL of spirits containing 40% alcohol, or 150 mL of wine containing 12% alcohol]);
32. Prolonged (≥ 7 consecutive or cumulative days) administration of systemic corticosteroids or growth hormones within 2 months prior to screening (with mode of administration including, but not limited to, intravenous administration, oral administration);
33. Subjects with known or suspected hypersensitivity to GLP-1 analogs or excipients;
34. Use of any investigational drug, vaccine or medical device within 3 months prior to screening;
35. Blood donation or significant blood loss (>400 mL), receipt of blood transfusion or use of blood products within 3 months prior to screening;
36. Female subjects being pregnant or breastfeeding at the time of screening, or subjects (including female partners of male subjects) who have plans for childbearing or sperm and egg donation from within 1 month prior to informed consent to 3 months after the last dose, or subjects of childbearing potential who refuse to use at least one effective contraceptive drug or device;
37. Possibility of failure to complete this study for other reasons, or unsuitable for the study in the opinion of the investigator.
    1. Subject Dropouts

Judgment of dropout and exit

As per the informed consent form, all subjects who have signed the informed consent form and are eligible for inclusion in the study upon screening have the right to exit from the study at any period of the study. During the double-blind core treatment period, any exit, regardless of when and why, is considered a dropout case if the full observation is not completed.

Reason for dropout and exit

1. Exit decided by the investigator

"Subject exit from the study at the discretion of the investigator" means that the investigator decides that a selected subject should exit from the study, because such subject is unsuitable to continue the study due to the following situations during the study. These include, but are not limited to the following:

1. Serious adverse reactions (SAR) occurring during the study which, at the discretion of the investigator, would increase the risk to the subject if he/she continues the study;
2. Major protocol deviation
3. Frequent episodes of hypoglycemia during the study that, at the discretion of the investigator, preclude the continuation of the study participation;
4. Occurrence of other medical conditions in the subject during the study that, at the discretion of the investigator, may affect the assessment of the efficacy and safety of the investigational drug;
5. Subject pregnancy;
6. Other conditions that, in the opinion of the investigator, make it inappropriate for the subject to continue receiving the investigational product.
7. Exit decided by the subject
8. The subject withdraws the informed consent;
9. Intolerable adverse event;
10. Loss to follow-up;
11. Others.

Handling of dropouts and exits

1. In the event of dropout/exit, the investigator should contact the subject as much as possible and ask for the reason, record the time of the last dose, and complete the assessment items as far as possible.
2. For subjects who drop out/exit due to an adverse event, the investigator should take appropriate therapeutic measures based on the subject's actual condition and follow them up closely until the adverse event resolves or an outcome is known. Adverse events shall be recorded in the original data and included in the statistical analysis.
3. The investigator should document the primary reason for the dropout/exit.
4. The original data shall be recorded.
5. Raw data should be recorded and retained for all subjects that are enrolled and have been administered with the numbered drug, regardless of whether or not they drop out/exit. It can be stored both as archives and as original record. All cases of dropout/exit should be summarized and statistically analyzed.
   1. Criteria for Study Termination
      1. Termination of the study requested by the investigator

The investigator may not be able to continue the study due to certain circumstances. When terminating a clinical study, the investigator must notify the subjects, the sponsor, the contract research organization (CRO), and the Ethics Committee, and state the reasons.

- - 1. Sponsor's request to terminate the study

Reasons for a sponsor's request to terminate a study or to stop a study at a site may include, but are not limited to:

1. Funding;
2. Management;
3. Inability of the investigator to follow the protocol, *Good Clinical Practice (GCP*) [4], etc.;
4. The investigator fails to recruit sufficient number of subjects;
5. Safety considerations.

Before terminating a clinical study, the sponsor must notify the CRO, the investigator, the Ethics Committee, and the National Medical Products Administration in writing and state the reasons.

- - 1. Termination of the study requested by the governmental authority

According to the *Provisions for Drug Registration*, if one of the following circumstances occurs during a clinical study, the NMPA may order the sponsor to modify the clinical study protocol, suspend or terminate the clinical study:

1. The Ethics Committee fails to perform its duties;
2. The safety of subjects cannot be effectively ensured;
3. There is evidence that the investigational product is ineffective;
4. The investigational product has quality problems;
5. There is falsification in the clinical study;
6. Other serious violations of GCP.
7. Treatment of subjects
   1. Description of the Study Drug(s)

Ecnoglutide polypeptide has the amino acid sequence of human GLP-1 analog (with homology of 84%). It is manufactured using the recombinant Escherichia coli expression system. The stock solution (drug substance) of this product is obtained by fermentation, extraction, purification, acylation of fatty acid chain, refined purification, (freeze-drying), etc., which is then prepared, sterilized, filtered and filled to obtain the Ecnoglutide Injection.

All the drugs used in clinical studies of this product are manufactured according to the current *Good Manufacturing Practice (GMP)*.

Ecnoglutide Injection: Its packaging material is 3 mL borosilicate glass sleeves for pen-injector, sealed with bromobutyl rubber stopper for pen-injectors and aluminum cap containing a gasket for pen-injectors. Each vial contains 1.2 mL of Ecnoglutide Injection at a concentration of 2 mg/mL; the packaging material of placebo injection is the same as that of Ecnoglutide Injection, without the active ingredient Ecnoglutide, and the volume is 1.2 mL per vial.

Ecnoglutide Injection and Ecnoglutide placebo injection are formulated with excipients, containing disodium hydrogen phosphate, propylene glycol, phenol, diluted hydrochloric acid/sodium hydroxide (only as pH regulator) and water for injection, with a pH of 7.2 to 7.6.

- 1. Dose Regimen
     1. **Usage and dosage**

The investigational product is administered via subcutaneous injection, once weekly. It is recommended that subjects try to inject on the same day of the week, and may inject at any time of the day, without the need to administer the drug based on meal times.

1. Run-in period: Inject 0.15 mL vehicle of Ecnoglutide Injection and administer for 4 consecutive weeks.
2. Treatment period:

- **For subjects randomly assigned to the 1.2 mg Ecnoglutide Injection group (N=70):**

Double-blind core treatment period: A starting dose of 0.3 mg of Ecnoglutide Injection administered for 4 weeks; up-titrate to 0.6 mg administered for 4 weeks; up-titrate to 1.2 mg administered for 16 weeks, for a total of 24 weeks of treatment, with unblinding after the last dose;

Open-label treatment period: Maintenance dose of 1.2 mg for 28 weeks;

The total dosing period is 52 weeks.

- **For subjects randomly assigned to the 1.2 mg volume-matching placebo group (N=35):**

Double-blind core treatment period: A starting dosing volume of 0.15 mL of Ecnoglutide Injection vehicle administered for 4 weeks; up-titrate to 0.3 mL administered for 4 weeks; up-titrate to 0.6 mL administered for 16 weeks, for a total of 24 weeks of treatment, with unblinding after the last dose;

Open-label treatment period: After the unblinding, a starting dose of 0.3 mg of Ecnoglutide Injection administered for 4 weeks; up-titrate to 0.6 mg administered for 4 weeks; up-titrate to 1.2 mg administered for 20 weeks, for a total of 28 weeks of treatment;

The total dosing period is 52 weeks.

- **For subjects randomly assigned to the 0.6 mg Ecnoglutide Injection group (N=70):**

Double-blind core treatment period: A starting dose of 0.3 mg of Ecnoglutide Injection administered for 4 weeks; up-titrate to 0.6 mg administered for 20 weeks, for a total of 24 weeks of treatment, with unblinding after the last dose;

Open-label treatment period: Maintenance dose of 0.6 mg for 28 weeks;

The total dosing period is 52 weeks.

- **For subjects randomly assigned to the 0.6 mg volume-matching placebo group (N=35):**

Double-blind core treatment period: A starting dosing volume of 0.15 mL of Ecnoglutide Injection vehicle administered for 4 weeks; up-titrate to 0.3 mL administered for 20 weeks, for a total of 24 weeks of treatment, with unblinding after the last dose;

Open-label treatment period: After the unblinding, a starting dose of 0.3 mg of Ecnoglutide Injection administered for 4 weeks; up-titrate to 0.6 mg administered for 24 weeks, for a total of 28 weeks of treatment;

The total dosing period is 52 weeks.

- - 1. **Dose modification criteria**

The predominant adverse reaction of GLP-1 analogs is gastrointestinal intolerance, which can be reduced by adopting the dose titration approach. If a subject develops an intolerable gastrointestinal adverse reaction during the dose titration phase, at the investigator's discretion, the dose may be decreased to the previous tolerated dose and administered for 2 weeks, then increased again in accordance with the protocol, and the treatment will be completed in accordance with the original protocol. If the subject is still intolerant, down-titrate to the previous highest tolerated dose to maintain treatment until completion of the study.

- - 1. **Treatment of missed dose**

In case of a missed dose, it should be made up as soon as possible if there are at least 3 days (72 h) before the next scheduled dose. If there are less than 3 days (72 h) before the next scheduled dose, no make-ups should be made and the next scheduled dose is regularly administered. One missed dose of medication should not affect the subsequent scheduled dosing dates.

- 1. Concomitant Medications

Information on concomitant medications will be collected from screening until the final study visit. At each visit, all subjects will be asked about the use of concomitant medications. Medications taken before receiving the first dose of investigational product will be recorded as prior medications. Medications taken after receiving the investigational product will be recorded as concomitant medications.

The use of concomitant medications in the study should be documented in detail on the concomitant medication status page of the electronic Case Report Form (eCRF), with the reason for the medication, method of administration, and start and stop dates.

- - 1. Prohibited concomitant medications/treatment

1. Except for the investigational drug and the salvage therapy drugs specified in the protocol, other treatments with hypoglycemic effects are prohibited during the study (including prescription drugs, over-the-counter medications, herbs, health care products, etc.);
2. Systemic glucocorticoids (except inhaled or topical glucocorticoids), growth hormone analogs;
3. Any weight-reducing treatment that may result in weight instability, including weight-reducing medications or weight-reducing surgery, etc.
   - 1. Permitted concomitant medications
4. Subjects' pre-existing antihypertensive and lipid-regulating medications may be continued during the study period, but the original drug variety and dosage should be kept as unchanged as possible;
5. When the subject meets the criteria for salvage therapy for hyperglycemia (see Section 11.3.3), the subject may be given salvage therapy medication according to the protocol (see Appendix V);
6. In the event of an adverse event requiring treatment during the study, drugs for symptomatic treatment may be given to subjects.
   - 1. Salvage therapy

T2DM subjects with fasting glucose meeting the following criteria can be treated concomitantly with hypoglycemic agent, which is gradually increased to the maximum prescribed dose (metformin [preferred], see Appendix V for details); and under special circumstances, the investigator can decide on whether to perform salvage therapy based on the subject's condition and routine clinical practice.

- Weeks 1 to 12: FPG >13.9 mmol/L (250 mg/dL) (determined by two FPG measurements on different days)
- Weeks 13 to 57: FPG >11.1 mmol/L (200 mg/dL) (determined by two FPG measurements on different days)

During the course of the study, subjects should undergo FPG retesting if SMBG FPG is found to exceed the above values, or if the investigator finds that FPG exceeds the above values with no apparent causative factors. The status of medication compliance and changes in diet and exercise shall also be checked and adjusted accordingly. FPG retesting is performed after at least 3 days of adjustment to determine whether salvage therapy for hyperglycemia should be performed.

Investigators should document the use of salvage therapies in the original medical record in detail, including the reason for the medication, the dose of the medication, the duration of the medication, and the frequency of the medication. Those subjects who receive salvage therapy during the double-blind core treatment period will be discontinued from study drug upon completion of the double-blind core treatment, and the study is completed after a 5-week safety follow-up period after the last dose. Subjects treated with salvage therapy during the open-label treatment period should continue to attend the visits as specified in the protocol until completion of the clinical study.

- 1. Contraception and other Restrictions
     1. Contraception

Subjects of childbearing potential (including female partners of male subjects) should have no plans for childbearing or sperm and egg donation from one month prior to informed consent to 3 months after the last dose, and they should use at least one effective contraceptive drug or device for contraception.

- - 1. Smoking and alcohol consumption

Subjects should avoid excessive smoking or alcohol consumption throughout the study period (from screening to completion of follow-up).

- 1. Medication Compliance

During the subject informed consent phase, the objectives of the study, basic information of the investigational drug, study process, dose regimen (e.g., dosage, administration method, study cycles, etc.), clinical observation, frequency and process of biological sample collection, potential risks of participating in the study, compensation and indemnification, etc., will be introduced in detail, so that subjects are fully informed for voluntary participation, and the medication compliance is improved.

During the study, the subjects will be instructed on the use of medication according to the protocol, and the use of medication will be monitored to provide guidance and to improve the medication compliance.

1. Management of investigational drug(s)
   1. Investigational Drug(s)

The sponsor will provide the investigational drug to the study center. The investigational drug provided for this study is manufactured according to current GMPs and is suitable for human use.

- 1. Packaging and Labeling of Investigational Drug

The sponsor is responsible for the preparation process and labeling, as well as providing detailed information of batch number, safety and stability data.

The study drugs will be labeled according to regulatory requirements and shipped at 2 to 8 ℃ away from light.

- 1. Storage of Investigational Drug

Upon receipt of the investigational drug, it must be stored at 2-8 ℃, protected from light, and freezing is prohibited.

- 1. Preparation of Investigational Drug(s)

Procedures related to the preparation and distribution of investigational drug are described in the drug manual.

- 1. Medication Training and Records

The first dose during the run-in period will be administered by the study staff by subcutaneous injection at the study center, who will train the subjects on drug administration method, and provide video and graphic materials to help the subjects complete the self-administration during the subsequent treatment period. If needed, the subject may go to the study center and have the medication administered by the study staff, or administer the medication under the direction of the study staff, or undergo re-training. After completing the double-blind core treatment period, subjects receiving placebo will enter the open-label study period and begin dose-titration administration, these subjects must be re-trained to ensure medication accuracy.

For each administration, subjects are required to keep a record of the time of administration and the dose administered in a diary card.

- 1. Accountability of Investigational Drug(s)

The distribution and return of all used and unused investigational drugs should be recorded, which will be maintained by the study center and inventoried periodically.

- 1. Handling and Disposal of Investigational Drug(s)

It will be decided at the end of the study whether to return all remaining investigational products (including empty packages) to the sponsor, according to the protocol requirements and the sponsor's opinion.

1. Study process
   1. Screening Period (D-42 to D-29)

Prior to enrollment and prior to the performance of any procedures, potential subjects will participate in a screening, where they will be provided with full details of the study assessments and procedures. They will also be provided with Informed Consent Forms (ICFs). Before signing the ICF, subjects will be given enough time to review the study information and ask any questions.

After that, the following screening assessment process will be performed:

- Recording of the demographic data
- Review of past/present medical history and concomitant medications, and inquiry about history of alcohol consumption, family history, surgical history, history of participation in clinical studies, history of allergies, history of blood donations/blood losses, history of drug abuse, history of menstruation (for female subjects), etc.
- Vital Signs
- Physical Examination
- Measurement of body height, weight, waist circumference and hip circumference
- 12-lead ECG
- Laboratory tests: Viral serology, hematology, urinalysis, blood biochemistry, coagulation function, blood pregnancy test (women of childbearing potential only), thyroid function test, calcitonin and C-peptide
- Collection of morning fasting-state blood samples for HbA1c, FPG and lipids tests
- Inclusion/exclusion criteria assessment
- Diet and exercise instruction
  1. Run-in Period (D-28 to D-7) - Visits -2 to -1

Specific items to be completed are listed below:

- Vital signs (performed on D-28, D-7)
- 12-lead ECG (performed on D-7)
- Laboratory tests: Hematology, urinalysis, blood biochemistry, coagulation function (performed on D-7)
- Urine pregnancy (women of childbearing potential only, performed on D-28), blood pregnancy (women of childbearing potential only, performed on D-7)
- Collection of morning fasting-state blood samples for HbA1c, FPG, insulin, and lipids tests (performed on D-7)
- Eating the standard meals (uniformly provided by the sponsor) and collection of 2hPBG samples (performed on D-7) (timed from the first bite of the standard meal)
- 0.15 mL vehicle of Ecnoglutide Injection for subcutaneous administration;
- Distribution of glucometer(performed on D-28)
- Dispensing/recovery of investigational drug(s)
- Distribution/recovery of diary cards
- Administration training
- Diet and exercise instruction
- Recording of AEs and concomitant medications
- Self-monitoring of blood glucose (FPG 3 times per week on different days)
- 7-point monitoring of blood glucose (V-1)
  1. Double-blind Main Study Period

Only subjects who are re-assessed for eligibility based on the results of D-7 and who are confirmed to meet all inclusion criteria and do not meet any of the exclusion criteria will be randomized to the double-blind core treatment period.

- - 1. D1 - Visit 1

Subjects in the fasting state arrive at the clinical study center in the morning and will undergo the following procedures:

- Recovery of diary cards
- Assessment of eligibility criteria
- Randomization
- Vital Signs
- Measurement of body height, waist circumference and hip circumference
- Collection of blood samples for population pharmacokinetics (PopPK) analysis prior to dosing
- Collection of blood samples for immunogenicity analysis prior to dosing
- Subcutaneous injection of Ecnoglutide Injection or placebo according to the different cohorts assigned;
- Distribution of investigational drugs and diary cards
- Administration training (if needed)
- Diet and exercise instruction
- Recording of AEs and concomitant medications
- Self-monitoring of blood glucose
  - 1. D29 / D57 / D85 / D113 - Visits 2 to 5

Subjects in the fasting state return to the clinical study center in the morning and will undergo the following procedures:

- Recovery of investigational drugs and diary cards
- Vital Signs
- Measurement of body height, waist circumference and hip circumference
- 12-lead ECG (only performed on D85)
- Laboratory tests: Hematology, urinalysis, blood biochemistry, coagulation function (only performed on D85)
- Urine pregnancy (women of childbearing potential only, performed on D57 and D113)
- Collection of morning fasting-state blood samples for HbA1c and FPG tests
- Collection of blood samples for PopPK analysis prior to dosing (only performed on D29, D57 and D85)
- Collection of blood samples for immunogenicity analysis prior to dosing (only performed on D85)
- Subcutaneous injection of Ecnoglutide Injection or placebo according to the different cohorts assigned;
- Distribution of investigational drugs and diary cards
- Administration training (if needed)
- Diet and exercise instruction
- Recording of AEs and concomitant medications
- Self-monitoring of blood glucose (FPG 3 times per week on different days)
  - 1. D168 - Visit 6

Subjects in the fasting state return to the clinical study center in the morning and will undergo the following procedures:

- Recovery of investigational drugs and diary cards
- Vital Signs
- Physical Examination
- Measurement of body height, waist circumference and hip circumference
- 12-lead ECG
- Laboratory tests: Hematology, urinalysis, blood biochemistry, coagulation function, blood pregnancy test (women of childbearing potential only), thyroid function test, calcitonin
- Collection of morning fasting-state blood samples for HbA1c, FPG, insulin and lipids tests
- Eating the standard meals (uniformly provided by the sponsor) and collection of 2hPBG samples (timed from the first bite of the standard meal)
- Collection of blood samples for PopPK analysis
- Collection of blood samples for immunogenicity analysis
- Distribution of investigational drugs and diary cards (investigational drugs will no longer be dispensed to subjects who have received salvage therapy during the double-blind core treatment period)
- Administration training (subjects receiving placebo treatment must be re-trained on administration method before entering the open-label treatment period, and other subjects will be trained on medication as needed)
- Diet and exercise instruction
- Recording of AEs and concomitant medications
- Self-monitoring of blood glucose (FPG 3 times per week on different days)
- 7-point monitoring of blood glucose

Each subject will be unblinded at this visit; after the unblinding, subjects receiving Ecnoglutide Injection during the double-blind core treatment period will continue to maintain on their original dose of Ecnoglutide Injection for 28 weeks; subjects receiving placebo during the double-blind core treatment period will be treated with Ecnoglutide Injection and receive dose titration, and must receive administration training again. Subjects from the 1.2 mg volume-matching placebo group will receive dose titration starting from a low dose of 0.3 mg Ecnoglutide Injection administered for 4 weeks, to 0.6 mg Ecnoglutide Injection administered for 4 weeks, and further to 1.2 mg Ecnoglutide Injection administered for 20 weeks, for a total treatment period of 28 weeks. Subjects from the 0.6 mg volume-matching placebo group will receive dose titration starting from a low dose of 0.3 mg Ecnoglutide Injection administered for 4 weeks, to 0.6 mg Ecnoglutide Injection administered for 24 weeks, for a total treatment period of 28 weeks.

For subjects who have received salvage therapy during the double-blind core treatment period and completed the double-blind core treatment period, they will return to the clinical study center for the safety follow-up visit 5 weeks after stopping the medication since this visit, and will be considered to have completed the study upon completion of the visit. Specific items to be completed are as below:

- Recovery of diary cards
- Vital Signs
- Physical Examination
- Measurement of body height, waist circumference and hip circumference
- 12-lead ECG
- Laboratory tests: Hematology, urinalysis, blood biochemistry, coagulation function, blood pregnancy test (women of childbearing potential only)
- Collection of blood samples for PopPK analysis
- Collection of blood samples for immunogenicity analysis
- Diet and exercise instruction
- Recording of AEs and concomitant medications
  1. Open-label Treatment Period
     1. D197 / D225 / D253 / D309 - Visits 7 to 10

Subjects in the fasting state return to the clinical study center in the morning and will undergo the following procedures:

- Recovery of investigational drugs and diary cards
- Vital Signs
- Measurement of body height, waist circumference and hip circumference
- 12-lead ECG (only performed on D253)
- Laboratory tests: Hematology, urinalysis, blood biochemistry, coagulation function (only performed on D253)
- Urine pregnancy (women of childbearing potential only, performed on D225 and D309)
- Collection of morning fasting-state blood samples for HbA1c and FPG tests
- Collection of blood samples for PopPK analysis prior to dosing (performed on D197, D225, D253 for subjects of the placebo group only)
- Collection of blood samples for immunogenicity analysis prior to dosing (only performed on D253 for subjects of the placebo group only)
- Subcutaneous administration of Ecnoglutide Injection according to the different cohorts assigned;
- Distribution of investigational drugs and diary cards
- Administration training (if needed)
- Diet and exercise instruction
- Recording of AEs and concomitant medications
- Self-monitoring of blood glucose (FPG 3 times per week on different days)
  - 1. D364 - Visit 11

Subjects in the fasting state return to the clinical study center in the morning and will undergo the following procedures:

- Recovery of investigational drugs and diary cards
- Vital signs
- Physical examination
- Measurement of body height, waist circumference and hip circumference
- 12-lead ECG
- Laboratory tests: Hematology, urinalysis, blood biochemistry, coagulation function, blood pregnancy test (women of childbearing potential only), thyroid function test, calcitonin
- Collection of morning fasting-state blood samples for HbA1c, FPG, insulin and lipids tests
- Collection of blood samples for PopPK analysis
- Eating the standard meals (uniformly provided by the sponsor) and collection of 2hPBG samples (timed from the first bite of the standard meal)
- Distribution of diary cards
- Diet and exercise instruction
- Recording of AEs and concomitant medications
- Self-monitoring of blood glucose (FPG 3 times per week on different days)
- 7-point monitoring of blood glucose
  1. Safety Follow-up Period (D399 - Visit 12)

All subjects are required to undergo a 5-week follow-up period and return to the clinical study center at the end of the follow-up period to complete the visit.

Specific items to be completed are listed below:

- Recovery of diary cards
- Vital Signs
- Physical Examination
- Measurement of body height, waist circumference and hip circumference
- 12-lead ECG
- Laboratory tests: Hematology, urinalysis, blood biochemistry, coagulation function, blood pregnancy test (women of childbearing potential only)
- Collection of blood samples for PopPK analysis
- Collection of blood samples for immunogenicity analysis
- Diet and exercise instruction
- Recording of AEs and concomitant medications
  1. Early Exit

Specific items to be completed are listed below:

- Recovery of investigational drugs and diary cards
- Vital Signs
- Physical Examination
- Measurement of body height, waist circumference and hip circumference
- 12-lead ECG
- Laboratory tests: Hematology, urinalysis, blood biochemistry, coagulation function, blood pregnancy test (women of childbearing potential only), thyroid function test, calcitonin
- Collection of blood samples for HbA1c, FPG, insulin and lipids tests
- Eating the standard meals (uniformly provided by the sponsor) and collection of 2hPBG samples (timed from the first bite of the standard meal)
- Collection of blood samples for PopPK analysis
- Collection of blood samples for immunogenicity analysis
- Diet and exercise instruction
- Recording of AEs and concomitant medications

1. Efficacy Assessments
   1. Pharmacodynamic (PD) Measures
      1. Sample collection

In line with the Standard Operating Procedures (SOPs) of the study center, blood samples for PD analysis will be collected according to the time points described in the study flowchart. For collection and processing of blood samples, the laboratory manual shall govern. Blood samples collected and processed for HbA1c (one of the PD measures) analysis will be transported from the clinical center to the central laboratory according to requirements of *Central Laboratory Services Manual*, and other PD measures will be analyzed as described in the respective laboratory manual.

Actual collection time for each sample were documented in the source data file, collection tube, and eCRF. For each PD measure, allowed time windows (time deviations) for blood sampling are presented in Table 4 through Table 8.

**Table 4. Blood Sampling Schedule for HbA1c and FPG Analysis**

| **SN** | **Visit** | **Time for sampling** | **Time window** | **Comments** |
| --- | --- | --- | --- | --- |
| 1 | Screening period | D-42~-29 | NA | Under fasting conditions, in the morning |
| 2 | Visit -1 | D-7 | ±3 d | Under fasting conditions, in the morning, pre-dose |
| 3 | Visit 2 | D29 | ±3 d | Under fasting conditions, in the morning, pre-dose |
| 4 | Visit 3 | D57 | ±3 d | Under fasting conditions, in the morning, pre-dose |
| 5 | Visit 4 | D85 | ±3 d | Under fasting conditions, in the morning, pre-dose |
| 6 | Visit 5 | D113 | ±3 d | Under fasting conditions, in the morning, pre-dose |
| 7 | Visit 6 | D168 | ±3 d | Under fasting conditions, in the morning |
| 8 | Visit 7 | D197 | ±7 d | Under fasting conditions, in the morning, pre-dose |
| 9 | Visit 8 | D225 | ±7 d | Under fasting conditions, in the morning, pre-dose |
| 10 | Visit 9 | D253 | ±7 d | Under fasting conditions, in the morning, pre-dose |
| 11 | Visit 10 | D309 | ±7 d | Under fasting conditions, in the morning, pre-dose |
| 12 | Visit 11 | D364 | ±7 d | Under fasting conditions, in the morning |

Note: HbA1c is to be tested at the local laboratory during screening period and in the central laboratory during other visits. FPG is to be tested in the local laboratory.

**Table 5. Blood Sampling Schedule for Analysis of 2hPBG**

| **SN** | **Visit** | **Time for sampling** | **Time window** | **Comments** |
| --- | --- | --- | --- | --- |
| 1 | Visit -1 | D-7 | ±3 d | To be collected within 2 h ± 5 min postprandial |
| 2 | Visit 6 | D168 | ±3 d | To be collected within 2 h ± 5 min postprandial |
| 3 | Visit 11 | D364 | ±7 d | To be collected within 2 h ± 5 min postprandial |

Note: 2hPBG is to be tested in the local laboratory.

**Table 6. Blood Sampling Schedule for Insulin Analysis**

| **SN** | **Visit** | **Time for sampling** | **Time window** | **Comments** |
| --- | --- | --- | --- | --- |
| 1 | Visit -1 | D-7 | ±3 d | Under fasting conditions, in the morning, pre-dose |
| 2 | Visit 6 | D168 | ±3 d | Under fasting conditions, in the morning |
| 3 | Visit 11 | D364 | ±7 d | Under fasting conditions, in the morning |

Note: Insulin is to tested in the local laboratory.

**Table 7. Blood Sampling Schedule for Lipid Analysis**

| **SN** | **Visit** | **Time for sampling** | **Time window** | **Comments** |
| --- | --- | --- | --- | --- |
| 1 | Screening period | D-42~-29 | NA | Under fasting conditions, in the morning |
| 2 | Visit -1 | D-7 | ±3 d | Under fasting conditions, in the morning, pre-dose |
| 3 | Visit 6 | D168 | ±3 d | Under fasting conditions, in the morning |
| 4 | Visit 11 | D364 | ±7 d | Under fasting conditions, in the morning |

Note: Lipid is to be tested in the local laboratory.

**Table 8. 7-Point Self-Monitoring Blood Glucose Schedule**

| **SN** | **Reference time** | **Time window** |
| --- | --- | --- |
| 1 | Within 30 min before breakfast | NA |
| 2 | 2 h after breakfast | ±30 min |
| 3 | Within 30 min before lunch | NA |
| 4 | 2 h after lunch | ±30 min |
| 5 | Within 30 min before dinner | -30 min |
| 6 | 2 h after dinner | ±30 min |
| 7 | Within 1 h before bedtime | NA |

Note: Subjects are required to perform self-monitoring at home on any day during visit windows and record the measurements in the diary card. At each visit, subjects are required to take with them the diary card, which will be reviewed by the investigator. The investigator will provide suggestions on medication and blood glucose monitoring in the next stage based on records in each diary card.

- - 1. Sample testing

Blood samples will be tested using validated procedures and methods outlined in *Central Laboratory Manual*.

The sponsor will provide complete written instructions for sample processing, operation, storage, and shipment prior to study initiation.

- - 1. Sample processing

Sample processing and storage will be performed according to appropriate SOPs and *Central Laboratory Manual*.

- 1. Body Measurements
     1. Weight and height

Height will be measured in centimeters and only measured at screening, with the results accurate to one decimal place.

Weight should be measured at the time points delineated in the study flowchart, with the results recorded in kg and accurate to one decimal place.

Height and weight measurements are described in Appendix VIII.

- - 1. Waist and hip circumferences

Waist and hip circumferences will be measured at the time points delineated in the study flowchart, with results recorded in cm and accurate to one decimal place.

Waist and hip circumference measurements are specified in Appendix IX.

1. Population PK Assessments
   1. Sample Collection

In line with the SOPs of the study center, blood samples for PopPK analysis will be collected at the time points described in the study flowchart. For collection and processing of blood samples, the laboratory manual shall govern. Blood samples for PopPK analysis will be collected, processed and shipped to the analytical laboratory for analysis as described in the laboratory manual. Approx. 3 mL of blood will be collected at each PopPK collection for analysis in subjects.

Actual times of collection for each sample will be documented in detail. Allowed time windows (time deviations) for blood sampling are listed in Table 9.

**Table 9. Schedule for PopPK Sample Collection**

| **SN** | **Visit** | **Time for sampling** | **Time window** | **Comments** |
| --- | --- | --- | --- | --- |
| 1 | Visit 1 | D1 | NA | Prior to first dose |
| 2 | Visit 2 | D29 | ±3 d | Pre-dose at Week 5 |
| 3 | Visit 3 | D57 | ±3 d | Pre-dose at Week 9 |
| 4 | Visit 4 | D85 | ±3 d | Pre-dose at Week 13 |
| 5 | Visit 6 | D168 | ±3 d | Post-dose at Week 24 |
| 6 | Visit 7 | D197* | ±7 d | Pre-dose at Week 29 |
| 7 | Visit 8 | D225* | ±7 d | Pre-dose at Week 33 |
| 8 | Visit 9 | D253* | ±7 d | Pre-dose at Week 37 |
| 9 | Visit 11 | D364 | ±7 d | Post-dose at Week 52 |
| 10 | Visit 12 | D399 | ±7 d | 5 weeks after the last dose |

Note: * Only for subjects receiving placebo during the double-blind treatment phase.

- 1. Sample Testing

Plasma samples for PopPK will be tested using validated procedures and methods outlined in *Laboratory Manual*.

The sponsor will provide complete written instructions for sample processing, operation, storage, and shipment prior to study initiation.

- 1. Sample Processing

Sample processing and storage will be performed according to corresponding SOPs and *Laboratory Manual*. If the protocol is inconsistent with the updatedcontents of *Central Laboratory Manual*, *Central Laboratory Manual* shall govern and the protocol will not be updated concurrently due to the updatedcontents, but will be corrected in parallel with the update of other contents.

Blood sampling and processing conditions: During the time windows of blood sampling specified in the protocol, about 3 mL of venous blood will be collected at each blood sample collection point into a vacuum blood sample collection tube containing K2EDTA anticoagulant (light protection not required at collection). The tube will be inverted 8-10 times (gently to avoid hemolysis as much as possible). Centrifugation will be performed at 1700 g (any value between 1530 g to 1870 g is acceptable) for 10 min at 2-8℃ (set temperature = 4℃) or room temperature (around 20℃), and plasma samples will be required to be obtained within 1 h of blood sample collection. After centrifugation, about 0.8 mL of the supernatant plasma will be dispensed into a test tube, and the remaining plasma will be dispensed into a backup tube. Plasma samples will be transferred to a -20°C freezer for temporary storage within 1 h after the end of centrifugation and stored in an ultra-low temperature freezer at or below -60°C within 25 days, or transferred directly to an ultra-low temperature freezer set at or below -60°C within 1 h after the end of centrifugation. Light protection will not be required during dispensing and transfer. Details will be implemented based on the laboratory manual.

- 1. Sample Shipment

All PopPK blood samples will be transported from the clinical center to the testing laboratory according to the laboratory manual and stored in a -80℃ freezer; back-up samples will be stored in a -80℃ freezer at the clinical center or a third-party facility (if there is no -80℃ freezer available at the site, samples may be temporarily stored in a -20℃ freezer and transferred to a -80℃ freezer within 25 days). (Note: Temperature range of the -80℃ freezer: -60℃ to -90℃, temperature range of the -20℃ freezer: -15℃ to -25℃) until the sponsor informs samples may be processed or the bioanalytical laboratory requests shipment.

1. Immunogenicity Assessments
   1. Sample Collection

In line with the SOPs of the study center, blood samples for immunogenicity analysis will be collected at the time points delineated in the study flowchart. For collection and processing of blood samples, the Laboratory Manual will prevail. Blood samples for immunogenicity analysis will be collected, processed, and shipped to the analytical laboratory for analysis as described in the Laboratory Manual. Approx. 3 mL of blood will be collected at each immunogenicity collection for analysis in subjects.

Actual times of collection for each sample will be documented in detail. Allowed time windows (time deviations) for blood sampling are listed in Table 10.

**Table 10. Schedule for Immunogenicity Sample Collection**

| SN | Visit | Time for sampling | Time window | Comments |
| --- | --- | --- | --- | --- |
| 1 | Visit 1 | D1 | NA | Prior to first dose |
| 2 | Visit 4 | D85 | ±3 d | Pre-dose at Week 13 |
| 3 | Visit 6 | D168 | ±3 d | Post-dose at Week 24 |
| 4 | Visit 9 | D253* | ±7 d | Pre-dose at Week 37 |
| 5 | Visit 12 | D399 | ±7 d | 5 weeks after the last dose |

Note: * Only for subjects receiving placebo during the double-blind treatment phase.

- 1. Sample Testing

The immunogenicity of multiple doses of Ecnoglutide Injection will be investigated based on the formation of anti-Ecnoglutide serum antibodies pre-dose (D1) and at different time points post-dose (D85, D168, D253 [for placebo group only], D399). Positive samples will be further characterized for all in vitro neutralizing activity and cross-reaction to endogenous GLP-1.

Immunogenicity sample testing will be performed using validated procedures and methods as outlined in the Laboratory Manual.

- 1. Sample Processing

Blood sample collection and processing conditions: Immunogenicity blood samples will be collected in vacuum blood sample collection tubes (containing coagulants) within the time windows specified in the protocol. At each blood sample collection point, 3 mL of whole blood will be collected from each subject (light protection not required at collection), placed at room temperature for at least 30 min, and centrifuged at 1700 g (any value between 1530 g to 1870 g is acceptable) at 2-8℃ (set temperature = 4℃) or room temperature (about 20℃) for 10 min. After dispensing the supernatant serum of not less than 0.7 mL into a test tube, the remaining serum will be dispensed into a backup tube. Serum samples will be transferred to a -20°C freezer for temporary storage within 1 h after the end of centrifugation and stored in an ultra-low temperature freezer at or below -60°C within 25 days, or transferred directly to an ultra-low temperature freezer set at or below -60°C within 1 h after the end of centrifugation. Light protection will not be required during dispensing and transfer. Details will be implemented based on the laboratory manual.

- 1. Sample Shipment

All immunogenicity blood samples will be transported from the clinical center to the testing laboratory according to the laboratory manual and stored in a -80℃ freezer; back-up samples will be stored in a -80℃ freezer at the clinical center or a third-party facility (if there is no -80℃ freezer available at the site, samples may be temporarily stored in a -20℃ freezer and transferred to a -80℃ freezer within 1 month) until the sponsor informs samples may be processed or the bioanalytical laboratory requests shipment.. (Note: The temperature range of the -80℃ freezer is -60℃~-90℃, and the temperature range of the -20℃ refrigerator is -15℃~-25℃).

1. Safety evaluation

Safety evaluation measures include:

- AEs, including TEAEs, SAEs, and AESIs (including hypoglycemia, cardiovascular effects, gastrointestinal effects, pancreatitis, gallbladder related disorders, etc.);
- Vital signs (sitting blood pressure [systolic and diastolic], pulse, body temperature), physical examination, 12-lead ECG;
- Clinical laboratory tests (hematology, urinalysis, blood biochemistry, coagulation, thyroid function panel [TSH/FT3/FT4], calcitonin).
  1. Safety Parameters
     1. Vital signs

Vital signs (sitting blood pressure [systolic and diastolic], pulse, body temperature) will be measured at the time points specified in the study flow chart. If the time for vital signs measurement coincides with that for blood sampling, the latter will be prioritized. Subjects are to take a rest before vital sign measurements and the measurements will be performed with subjects at rest.

Additional vital sign measurements may be performed at other times if deemed necessary.

- - 1. Physical examination

Complete physical examinations will be performed by the investigator at the time points specified in the study flow chart.

Physical examination includes mucocutaneous, lymph nodes, head, neck, chest, abdomen, spine and limbs, and others.

Other visits during study treatment will be performed by the investigator with appropriate targeted physical examinations based on clinical observations and symptoms if deemed necessary by the investigator.

- - 1. 12-lead ECG

A 12-lead ECG (heart rate, QT interval, QTc interval, QRs interval, PR interval, RR interval) will be taken at the time points described in the study flowchart and subjects are to remain at rest during the examination.

Additional 12-lead ECG monitoring may be performed at other times if deemed necessary.

- - 1. Laboratory assessments

Safety laboratory tests (hematology, urinalysis, blood biochemistry, coagulation, thyroid function panel [TSH/FT3/FT4], calcitonin, pregnancy [women of childbearing potential only]) will be performed at the time points specified in the study flowchart.

Additional clinical laboratory tests may be performed at other times if deemed necessary based on the clinical conditions of subjects.

- - 1. Blood glucose monitoring

Subjects are required to use a glucometer (a portable glucometer is acceptable) to perform fasting fingerstick blood glucose testing in the morning three times on different days every week during the run-in, double-blind core treatment, open-label treatment and follow-up periods, and perform 7-point SMBG within the time windows required by V-1, V6 and V11 protocols.

- - 1. Viral serology

Hepatitis B surface antigen (HBsAg), HCV antibody and HIV antibody testing will be performed during the screening period; in case of positive HBsAg, an additional HBV DNA quantitative test will be required.

- 1. Adverse Events
     1. Definition of adverse events

An adverse event (AE) refers to all adverse medical events that occur after a subject receives the investigational product and which may be manifested as symptoms, signs, diseases, or laboratory test abnormalities, but which do not necessarily have a causal relationship with the investigational product.

Events that meet the definition of AE including:

- Exacerbation of a chronic or intermittent pre-existing condition, including an increase in frequency and/or severity of the condition;
- New medical conditions detected or diagnosed after investigational product administration (emergent during the reporting period), even though it may have existed before the start of the study;
- Signs, symptoms, or the clinical sequela of a suspected drug-drug interaction;
- Signs, symptoms, or the clinical sequela of a suspected overdose of either investigational product or concomitant medications (overdose per se will not be reported as an AE/SAE).

Events that do not meet the definition of AE including:

- Medical or surgical procedures (e.g., endoscopy, appendectomy); the condition that leads to the procedure should be reported as an AE if it meets the criteria of an AE;
- Situations where no untoward medical event occurs (e.g. social and/or convenience admission to a hospital)
- Anticipated day-to-day fluctuations of pre-existing disease(s) or condition(s) present or detected at the start of the study that do not worsen.

If an AE is identified through reporting or observation, the Investigator or designee will further evaluate and record the following information:

- Term of adverse event (AE)
- Time of onset and resolution
- Severity
- Serious adverse events (SAE) or not
- Criteria for seriousness (if applicable)
- AESI or not
- Action taken with investigational product due to AE
- Outcome of AE
- Causal relationship to investigational product
- Action taken with AE
  - 1. Severity of an adverse event

Severity of AEs will be graded by the investigator according to the *Common Terminology Criteria for Adverse Events (CTCAE)* Version 5.0 criteria:

- **Grade 1: Mild;** asymptomatic or mild symptoms; clinical or diagnostic observation only; intervention not indicated.
- **Grade 2: Moderate;** minimal, local or noninvasive intervention indicated; limiting age-appropriate instrumental ADL*.

* Instrumental ADL refer to preparing meals, shopping for groceries or clothes, using the telephone, managing money, etc.

- **Grade 3:** Severe or medically significant but not immediately life-threatening; hospitalization or prolongation of hospitalization indicated; disabling; limiting self care ADL*.

** Self care ADL refer to bathing, dressing and undressing, feeding self, using the toilet, taking medications, and not bedridden.

- **Grade 4:** Life threatening consequences; urgent intervention indicated.
- **Grade 5:** Death related to AE.
  - 1. Causality assessment between AE and investigational product

For each AE/SAE, the investigator must keep a record, perform a review, and provide a causality evaluation which is to be updated with follow-up information. Causal relationship between an AE and the investigational product should be judged considering the following aspects:

1. Whether there is a reasonable temporal relationship between the start of medication and the occurrence of the AE;
2. Whether the AE conforms to the known type of adverse reaction of the product;
3. Whether the AE disappears or abates after discontinuation or dose reduction;
4. Whether the same reaction recurs after re-exposure to the same product;
5. Whether the AE can be explained by concomitant medication, the patient's clinical condition, or the effect of other treatments.

The causal relationship between the AE and the investigational product will be determined according to the 5 indicators above sequentially.

| **Judgment result** | **Judgment index** | | | | |
| --- | --- | --- | --- | --- | --- |
| **1** | **2** | **3** | **4** | **5** |
| **Definitely related** | **+** | **+** | **+** | **+** | **-** |
| **Probably related** | **+** | **+** | **+** | **?** | **-** |
| **Possibly related** | **+** | **±** | **±?** | **?** | **±?** |
| **Possibly unrelated** | **-** | **-** | **±?** | **?** | **±?** |
| **Not related** | **-** | **-** | **-** | **-** | **+** |

Note: + indicates definite or positive; - indicates negative; ± indicates difficult to judge; ? indicates unknown. indicated unknown.

- - 1. Evaluation of clinical laboratory test abnormalities and other abnormalities considered as AEs or SAEs

Abnormal laboratory tests and vital sign assessments which are not clinically significant are not recorded as AEs or SAEs. Those clinically significant abnormal laboratory findings (e.g., hematology, urinalysis, blood biochemistry, coagulation, etc.) and other abnormal assessments (e.g., ECG, vital sign assessments) may be recorded as AEs based on medical judgment; however, such abnormalities identified at screening are to be considered to have existed prior to signing the informed consent form and may be recorded as medical history and baseline status based on medical judgment rather than AEs. If any laboratory test abnormality is a part of a syndrome, it will be required to record the syndrome or any diagnosis (such as anemia), instead of the abnormality itself (i.e., decreased hemoglobin).

The investigator should exercise medical and scientific judgment in deciding whether an abnormal laboratory finding, or other abnormal assessment is clinically significant. For example, a markedly low serum glucose concentration may not be accompanied by coma or convulsions yet be of a magnitude to require glucose administration to prevent such sequelae.

- - 1. Action taken with investigational product

If it is necessary for the investigator to alter the administration of the investigational product from the procedure described in the study protocol due to the well-being and safety of the subject, one of the following options will be taken and recorded on the AE eCRF page:

- Continued drug use
- Dose reduction
- Dose suspension followed by resumption
- Discontinue medication
- Dose suspension
- Dose increase
- Unknown
- NA
  - 1. Outcome

The outcome of an AE will be recorded on the AE eCRF as follows:

- Recovered
- Recovering
- Not recovered
- Recovered with sequelae
- Death
- Unknown
  1. Adverse Events of Special Interest

In the study, hypoglycemia, cardiovascular effects, gastrointestinal effects, pancreatitis, gallbladder related disorders, etc. are to be considered adverse events of special interest (AESIs). Study team members should be trained to take particular notice of symptoms/signs suggestive of AESIs in the study.

- 1. Definition of Serious Adverse Events, Suspected Unexpected Serious Adverse Reactions, and Important Medical Events

A serious adverse event (SAE) refers to any untoward medical event that results in death, is life-threatening, results in persistent or significant disability or incapacity, requires inpatient hospitalization or prolongation of existing hospitalization, or is a congenital anomaly or birth defect following the administration of an investigational product.

A suspected and unexpected serious adverse reaction (SUSAR) involves the fact that nature and severity of clinical manifestations exceed those in the Investigator's Brochure of the investigational product, the package insert of the marketed drug or the summary of product characteristics.

A important medical event (IME) may not be immediately life-threatening, result in death, or require hospitalization, but may jeopardize the patient/subject or may require intervention to prevent one of the outcomes listed above based on medical and scientific judgment. These should be considered SAEs. Examples of such events include, but are not limited to, intensive treatment in an emergency room or at home for allergic bronchospasm, cachexia and convulsions not resulting in hospitalization, drug dependence, or addiction.

- 1. Pregnancy Exposure Events

Pregnancy testing must be performed in all female subjects of childbearing potential as specified in the study flowchart. The results of all pregnancy tests (positive or negative) are to be recorded on the eCRF. If a female subject has a positive pregnancy test, the subject is to immediately discontinue study treatment. Pregnancy events will be collected starting from the time of signing of the informed consent forms (ICF).

Female subjects should be instructed to contact the investigator immediately if they suspect that they may become pregnant (e.g., menolipsis or menstruation delayed) at any time during study treatment. If the female partner of a male subject suspects she may become pregnant during study treatment, immediate contact with the investigator is required. Whenever possible, partner's pregnancy should be followed to determine the outcome.

Pregnancy itself is not considered an AE, but is managed as an SAE. During the study, if the investigator become aware of any pregnancy in a female subject or the female partner of a male subject, the investigator should complete a *Pregnancy Report Form* within 24 h of awareness and report it to the sponsor, the CRO entrusted by the sponsor and the Ethics Committee of the site. All pregnancy outcomes (abortion spontaneous, elective abortion, ectopic pregnancy, normal birth, or congenital anomaly) should be followed up and documented even if the subject has exited from the study. In the case of a live birth, the infant should be followed for at least 30 days after birth.

If a pregnancy outcome meets the criteria for an SAE, such as spontaneous abortion, stillbirth, neonatal death, congenital anomaly, ectopic pregnancy, the investigator should report it according to reporting procedures for SAEs. Elective induced abortion aimed at pregnancy termination which occurred without complications is not to considered as an SAE but should be reported as a pregnancy follow-up entry.

A male subject will not be exited from the study after his partner becomes pregnant, but the physical conditions of his partner are to be recorded, reported and followed up with reference to the handling of female subject pregnancy.

- 1. Reporting of Serious Adverse Events and Suspected Unexpected Serious Adverse Reactions

For any SAE, whether related to the investigational product or not, the investigator is to complete a *Serious Adverse Event Report Form* within 24 h of awareness as much detail as possible. A completed form should be reported to the sponsor and entrusted institutions via email.

The initial report should include the following as far as possible: reporting source, basic subject information, name of the investigational product, SAE name, onset time, duration, severity of SAE, correlation with the investigational product, treatment and the outcome of the event. The investigator will continue to follow up SAEs after completing the initial report, and timely submit relevant updated information or information modified for the previous report and others in the form of follow-up reports within 24 h of awareness of updated information. The final report on *Serious Adverse Event Report Form*s should be completed until the end of the event.

The sponsor will be required to conduct a comprehensive analysis, evaluation and judgment of SAEs immediately upon awareness of the event. Expedited reporting to the national drug evaluation agency will be performed according to the nature (category) of SAEs within the following timelines:

1. For fatal or life-threatening unexpected serious adverse reactions, the sponsor should report them as soon as possible after first awareness and within no more than 7 days, and complete follow-up information within the following 8 days.

Note: The day on which the applicant become first aware is D0.

1. For non-fatal or life-threatening unexpected serious adverse reactions, the sponsor should report them as soon as possible and within no more than 15 days after first awareness.
   1. Follow-up of Adverse Events and Serious Adverse Events

All AEs and SAEs must be followed until resolution, returning to the baseline level, improving to a stable state, until the event is otherwise explained, or the subject dies or is lost to follow-up. The investigator is responsible for ensuring that follow-up information includes any supplemental investigations as may be indicated to elucidate the nature and/or causality of the AE/SAE as completely as possible. This may include any additional laboratory test or investigation, or consultation documents from other health care professionals.

The sponsor may request the investigator to perform or arrange supplemental examinations and/or evaluations. If a subject dies during participation in this study or during the specified follow-up period, a copy of the report on autopsy findings (including histopathology), if available, should be provided to the sponsor and entrusted institutions.

- 1. Recording Adverse Events

During the study, AEs spontaneously reported by subjects and/or response to their open-ended questions from study personnel or AEs identified through observation will be documented based on the investigator's normal clinical practice and on the AE pages of the site's eCRF.

All events meeting the definition of AE must be collected and reported. In this study, any untoward medical event will be collected from subjects from the run-in period through the end of the study. Any clinical AE that occurred after signing informed consent and before the first dose of investigational product will be recorded in the eCRF as medical history/concomitant medical condition and not as an AE. If possible, AE terms should be reported in standard medical terminology.

The onset time and resolution time of related AEs and SAEs are specified as follows;

- Onset time of AE: For a new disease, the onset time is when the subject experiences AE or relevant symptoms and signs; for an underlying disease, the onset time is when the disease aggravates, rather than when it is reported by the subject or the investigator becomes aware of it. If an AE is a clinically significant abnormal laboratory test or ancillary test, the onset time will be recorded as the sampling or testing time.
- Resolution time of AE: It is required to record the end date of any AE or AE related symptoms and signs; if an AE is the aggravation of an underlying disease, the date when the AE returns to baseline and improves to a stable state will be recorded as the resolution date; if the AE is a clinically significant abnormal laboratory test or auxiliary test, the end time will be the sampling or test time.
- If a subject experiences two or more episodes of an AE and the subject recovered between the two episodes (referring to the resolution of the AE), both AEs will be counted.

The onset time of an AE will be used as the onset time of a corresponding SAE, and resolution time of AE will be used as the resolution time of a corresponding SAE.

1. Direct Access to Source Data/Documents
   1. Study Monitoring

Before the site allows subject enrollment, representatives of the sponsor will visit the site, in order to:

- Determine the adequacy of the facilities
- Discuss with the investigator(s) and other personnel their responsibilities regarding protocol compliance, and the responsibilities of sponsor or its representatives. Documentation will be made by both the sponsor and the investigator.

The sponsor will appoint a study monitor to monitor the study which will ensure adequate conduct of the study. The monitor will act as the contact with the site. A study monitor will be identified who will be responsible for liaison with and providing support to the study center.

The study monitor and regulatory authority inspectors are responsible for contacting and visiting the site for the purpose of inspecting the facilities and, upon request, inspecting various records of the study (e.g., eCRFs, essential documentation, and other pertinent data) provided that subject information confidentiality is respected.

During the study, the monitor will periodically contact the site in order to:

- Provide information and support to the investigator(s).
- Verify that the facility remains acceptable.
- Verify that the study team is adhering to the protocol, that data are accurately recorded in the eCRFs, and that the study drug accountability checks are being performed.
- Perform source data verification. This includes a comparison of data in the eCRFs with each subject’s medical records at a hospital or practice, and other records relevant to the study. This will require direct access to all original records for each subject (e.g. clinical charts).
- Record and report all protocol deviations not previously sent to the sponsor.
- Verify that AEs and SAEs have been properly documented on eCRFs.
- Verify that all SAEs have been reported to the sponsor and SAEs meeting the reporting criteria have been forwarded to the IEC/IRB per site requirements.

The monitor will be available at visit if the investigator(s) or other staff needs information or advice.

- 1. Audits and Inspections

Authorized representatives of the sponsor, regulatory authorities, or the Ethics Committee may visit the study center for audits or inspections, including source data verification. The purpose of sponsor audits or inspections are to systematically and independently examine all study-related activities and documents to determine whether these activities are performed as scheduled and data are documented, analyzed, and accurately reported in accordance with the protocol, GCP, International Council for Harmonization (ICH) guidelines, and any applicable regulatory requirements. The investigator should contact the sponsor immediately if contacted by a regulatory agency about an inspection.

1. Data Management

In this study, data management is to be performed based on the *Technical Guidance for Clinical Trial Data Management*, *Guidelines for Data Management and Statistical Analysis Plan of Drug Clinical Trials*, *Technical Guidelines for Electronic Data Collection of Clinical Trials* by National Medical Products Administration (NMPA), and requirements in GCP and ICH-GCP. The main steps or contents of data management include but not limited to the following contents:

- 1. Data Management System

In the study, an electronic data capture system (EDC) will be used for data management. The system will be DFdiscover EDC (Version 5.4.0 or above), a computerized data management system including database creation, data entry, data quality control and data reporting.

- 1. Data Management Plan (DMP)

According to the clinical study protocol, the DMP is to be written by the Data Manager to standardize the entire data management process. As a dynamic document, DMP may be modified and updated according to the actual situation during the study.

- 1. eCRF Design

The data manager is to develop the eCRF according to the original data such as the clinical study protocol and study medical records and the clinical data acquisition standards harmonization user guide (CDASH User Guide).

- 1. Data Verification Plan (DVP)

The data verification plan includes three parts: system edit check, manual check and Statistical Analysis System (SAS) program check. Programmable data points will be incorporated into the system edit check or SAS program check as far as possible. For non-programmable data points, elements of the check will be described in detail in the manual verification.

- 1. Database Build

Database builders will construct an EDC database according to finalized protocol, eCRF and other documents. Upon completion of the construction, a description file for the database structure will be generated.

Database programmers are to complete program configurations for the edit check in EDC based on the protocol, eCRF, and DVP.

Internal testing, including page testing, authority testing, and edit check procedures, should be performed after the database build and edit check programs are written. The testing process is to be completely recorded, and finally a test report is to be developed.

- 1. User Acceptance Testing (UAT)

Upon completion of in-house testing, the data manager shall assist the sponsor or its designated representatives in performing the UAT. Any discovery at UAT is be recorded in the problem list and fed back to database builders, who is to modify the database against the UAT problem list and perform UAT with the modified database until no new problem arises.

When the UAT is accepted and approved by the sponsor, the database may go live. After that, relevant users may apply for their EDC accounts based on different roles. Following go-live, data manager will inform the sponsor and other study-related study personnel via email and inform them that no test data are allowed to be entered into the formal database.

- 1. EDC Training

Users who apply for authority for DFdiscover Data Management System must be trained on EDC to ensure that they have appropriate abilities to perform their work. The sponsor organizes relevant personnel while coordinating the training schedule, primarily to provide training on EDC operation, confidentiality and security of data. The data manager needs to keep a complete record on training content, lecturers, training date and trainees. Newly included personnel must receive the corresponding training timely and keep relevant training records.

- 1. Data Entry and Review Process

The primary responsibility of the investigator is to ensure that data reported on the eCRFs or other forms are accurate, complete, and timely-entered and that data on the eCRFs are obtained from original subject data and any discrepancies must be explained.

The Clinical Research Associate (CRA) is responsible for source data verification (SDV), and logging in EDC on site to check consistency between eCRF data and source data. Issues can be queried online at any time when they are identified. After data are entered in EDC database, the system will automatically check the data according to the system edit check which has been set, and will automatically issue system queries for problematic data. DM manually checks the data according to DVP and sends manual queries in the EDC database for problematic data.

Queries from CRA SDV and DM verification will be answered as soon as possible by the investigator or a clinical research coordinator (CRC) designated and trained by the investigator. CRA and DM shall verify the queries issued by themselves according to the investigator's answers and may issue another query if necessary until all data queries are resolved.

The investigator or CRC may modify data following data verification. For modified data, the reason for modification should be entered in the eCRF, and the audit trail should be presented in the database. The investigator is to review all final data. After data in the database have been verified and cleaned by CRA and DM, the principal investigator is to verify the authenticity and integrity of the data and electronically sign the data.

- 1. Medical Coding

Medical coding of AEs, prior and concomitant medications will be performed using the Medical Dictionary for Regulatory Activities (MedDRA) and World Health Organization Drug Dictionary (WHODrug) in the study. The dictionary is to be upgraded to the latest version prior to database lock. In case of failure in coding, communication with the investigator will be required by sending a query, and the coding is to be finally completed before database lock.

- 1. External Data Management

An draft external data transmission agreement is to be prepared by Data Management and reviewed and verified by the sponsor and any external data provider. Prior to formal data transmission, data transmission testing shall be performed as agreed in the external data transmission protocol. Any external data provider shall complete external data transmission according to the provisions of external data transmission agreement, and the data manager should check external data in a timely manner. If issues are identified during the check, it shall be timely verified with the external data provider(s). If necessary, re-transmission of data may be required.

- 1. Data Validation Meeting

After data clearing, data manager or statisticians will prepare a Data Validation Report (DVR). Upon completion of DVR, the principal investigator, sponsor, data management personnel and statisticians will be organized to hold a data validation meeting, during which the following relevant elements will be discussed: unresolved queries, cases with dropouts and protocol deviations, SAEs, statistical analysis plan, division of analysis dataset for final verification, and whether to lock the database will also be discussed. The final list of protocol deviations will be verified after the data review meeting, and the investigator may be asked again for disputed queries until such queries are resolved.

- 1. Database Lock

After the population division is determined and all contents in the database lock list are verified for their completion status, the approval document for database lock is to be jointly signed by the principal investigator, sponsor, data management personnel and statisticians, and the database lock will be completed by Data Management. Locked data files shall not be altered. After database lock, if issues with data persist, unlocking may be applied for if necessary. Unlocking can only be performed after being agreed and jointly signed by the principal investigator, sponsor, data management personnel and statisticians, and relevant written records must be available. When all participants have received the approval form, data manager will perform unlocking in the system and the investigator will correct the data. Once all changes have been made, it's necessary to clean this data point and associated data again and perform database lock again.

- 1. Data Management Report (DMR)

A DMR will be written by the data manager after database lock. DMR shall provide a comprehensive and detailed description of implementation process of data management, including participating units/departments and their responsibilities, major time points, case report form (CRF) and database design, data verification and cleaning, medical coding, data quality assurance, data transmission records at important time points, version history of key documents, and provide a description of deviations from DMP. Sponsor will review and approve the DMR.

- 1. Archiving of Data and Documents

At the end of study, all parties shall archive and preserve involved data and documents.

Project data management documents will be retained for at least 5 years after marketing of the drug according to regulatory requirements.

1. Statistical Considerations
   1. Hypothesis Testing and Multiplicity

This is a pivotal study to evaluate the efficacy and safety of Ecnoglutide Injection, with the primary efficacy endpoint of changes in HbA1c after 24 weeks of treatment from the baseline. The statistical hypotheses are as follows:

• null hypothesis H0: μT-μC ≥ δ (-0.5%)

• alternative hypothesis H1: μT-μC < δ (-0.5%)

Where μT is the overall average change in HbA1c after 24 weeks of treatment with 1.2 mg or 0.6 mg from baseline in the Ecnoglutide study group, μC is the overall average change in average HbA1c after 24 weeks of administration from baseline in the combined placebo group, and δ is the superiority margin, which is taken as -0.5% in this study.

This study contains Ecnoglutide-1.2 mg and Ecnoglutide-0.6 mg study groups. Hypothesis testing will be performed on the two study groups separately based on the estimands, controlling for overall type I error of no more than 0.025 (one-sided) by the sequential test method, i.e., the difference between the 1.2 mg study group and the placebo group will be tested first, and if the H0 is rejected, the test will continue to be performed between the 0.6 mg study group and the placebo group, otherwise the test will be stopped. The nominal significance level of the each test is 0.025 (one-sided), and H0 could be rejected if the test p<0.025 (one-sided) or the upper limit of the two-sided 95% confidence interval for the inter-group difference (μT-μC) < δ.

- 1. Sample Size

Assuming that the expected effect difference (ETD) of HbA1c between the Ecnoglutide-1.2 mg or 0.6 mg study group and the placebo group is -1.2%, the standard deviation (SD) is 1.1%, the significance level α is 2.5% (one-sided), the power (1-β) is 90% and subjects are randomly assigned to Ecnoglutide-1.2 mg, 0.6 mg study groups and pooled placebo group at a ratio of 1:1:1, at least 53 subjects required to be enrolled in each group as calculated by the PASS software. Given a dropout rate of approx. 20%, it is planned to enroll 70 subjects in each group, with an overall sample size of 210 subjects.

- 1. Statistical Analysis Population

Full analysis set (FAS): Consistent with the definition of population in primary estimand, i.e., all subjects randomized and receiving at least one dose of investigational product will be included in the FAS population. Subjects will be grouped based on the treatment they are assigned (Ecnoglutide Injection or placebo), rather than the treatment actually received.

Safety Set (SS): Including all subjects who have received at least one dose of investigational product (Ecnoglutide Injection or placebo) and have safety evaluation after medication. SS is mainly used for safety evaluation of drugs and is grouped according to the treatment actually received.

Population Pharmacokinetics Set (PopPKS): Includes all subjects with at least one available post-dose pharmacokinetic data.

The division of the above-mentioned population will be confirmed after completing cleansing and review of study data and before the database lock, and population division decision will be made.

- 1. General Statistical Considerations

All statistical analyses are performed using SAS 9.4 (or above) software unless otherwise stated. Quantitative indicators will be described as calculated mean, standard deviation, median, Min, Max., lower quartile (Q1), upper quartile (Q3), and the classification and rank indicators are described as the number and the percentage of subjects in each classification and rank.

Inter-group comparison of quantitative indicators are performed using analysis of variance or rank sum test depending on the distribution of the data, classification indicators are tested by chi-square test or Fisher’s exact test (if chi-square test is not applicable) and the rank data are tested by rank sum test or Cochran-Mantel-Haenszel test.

- 1. Demographics and Baseline Characteristics

The number of subjects enrolled and completed in all and each site of the study, and the number of subjects included in each analytical dataset are summarized. The subjects who violate the protocol and the reasons are presented; the list of subjects excluded from each analysis population is presented.

Demographics and baseline characteristics are analyzed based on FAS. Demographics characteristics, present and past medical history, treatment history, general condition, and baseline information are descriptively summarized for each group.

Treatment compliance of subjects in each group is summarized based on FAS population.

- 1. Efficacy Analysis
     1. Analysis of primary estimand

For main analysis, primary estimand is analyzed with mixed model repeated measures (MMRM), which takes changes in HbA1c from baseline at individual post-treatment visits as the dependent variable, the baseline HbA1c levels, visit time points, treatment groups and other necessary baseline characteristic factors as explanatory variables. The model is used to obtain covariate-adjusted estimates of the mean changes in HbA1c at week 24 from baseline in each group and their standard errors, 95% confidence intervals, as well as average inter-group difference between different dose groups of Ecnoglutide Injection and placebo control group, and its 95% confidence interval. If the upper limit of the interval < the superiority margin (-0.5%), it indicates that the corresponding dose group is superior to the placebo control group, otherwise it does not indicate that the dose group is superior to the placebo control group.

For subjects whose HbA1c data at week 24 are not collected after termination of treatment, missing data will be imputed in the main analysis based on retrieved dropout (RDO) data; for subjects whose HbA1c data at week 24 are not collected after salvage therapy, missing data will be imputed based on subjects who receive salvage therapy and no data are missing.

As a sensitivity analysis, the changes in HbA1c at week 24 from baseline will be analyzed using analysis of covariance (ANCOVA), and the baseline HbA1c level and treatment group variables are included in the model; missing data will be processed with the methods such as imputation based on control group data (J2R) in sensitivity analysis.

In addition, subgroup analysis will be conducted for the primary estimand to explore efficacy differences among different subgroups of the population.

- - 1. Analysis of secondary estimands

For secondary estimand 1, hypothetical strategies will be used for the intercurrent event of “salvage therapy”, that is, the data after salvage therapy will not be included in the analysis. The data after salvage therapy will be predicted based on the data of subjects with similar characteristics in the same group who do not experience the intercurrent event.

For secondary estimand 2, the changes in FPG after 24 weeks of treatment from baseline, changes in body weight after 24 weeks of treatment from baseline and the percentage changes will be analyzed by methods and strategies similar to those of the primary estimand.

Other secondary efficacy endpoints such as HbA1c, FPG, 2hPBG, 7-point SMBG, HOMA-IR, HOMA-β, insulin, TG, LDL, HDL, body weight, waist circumference, hip circumference will be summarized by the treatment groups and time points specified in the protocol, and visual graphs will be used to show changes in the main descriptive statistics for each endpoint over time, if necessary. For continuous endpoints, the MMRM model will be used to calculate the average inter-group difference and its 95% CI of the changes in each endpoint from baseline at each visit; for categorical endpoints (the proportion of subjects with HbA1c<7% and ≤6.5%), logistic regression model will be used for analysis. Statistical analyses of secondary efficacy endpoints are based only on available observed data, without data imputation.

- 1. Safety Analysis

All safety evaluation indicators, including concomitant medications, AEs, laboratory tests, vital signs, physical examination, and 12-lead ECG will be analyzed based on the SS analysis set.

- - 1. Prior and concomitant therapy

Concomitant medication will be coded using the current WHODrug drug dictionary. Prior and concomitant medications will be listed by subjects, and summarized by treatment with anatomical therapeutics and anatomical therapeutic chemical (ATC).

- - 1. Adverse events

Treatment-emergent adverse events (TEAEs) are statistically analyzed mainly in the study. TEAEs are defined as AEs occurred from the first use of the study drug (Ecnoglutide Injection or placebo) during the core treatment period to the last visit during the safety follow-up period.

The number of the following events, the number of subjects who experience these events, and the incidence are summarized: all AEs, treatment-emergent AEs (TEAEs)/treatment-related AEs (TRAEs), AEs/TEAEs/TRAEs of special interest, hypoglycaemia event-related AEs/TEAEs/TRAEs, grade ≥ 3 AEs/TEAEs/TRAEs, SAEs/treatment-related SAEs, AEs /TEAEs/TRAEs leading to discontinuation of medication, AEs/TEAEs/TRAEs leading to exit from the study, etc. Adverse events will be coded using the current version of MedDRA®. A list of AE data including preferred term (PT), system organ class (SOC), treatment, severity, and relationship to investigational product will be provided. The number of subjects who experience AEs and the number of AEs will be summarized by SOC and PT. AEs will also be summarized by severity and the relationship to the investigational product.

- - 1. Laboratory evaluation

Laboratory evaluations (including hematology, urinalysis, blood biochemistry, coagulation function, pregnancy, thyroid function panel [TSH, FT3, FT4] and calcitonin) will be listed and summarized by treatment and protocol-specified collection time point. Observed clinical laboratory data and their changes from baseline will be summarized by treatment at each collection time point specified in the protocol. For the clinical significance determination or severity grading of each test, the number and percentage of subjects of different combinations of changes in each group will be summarized in the form of a cross-tabulation of changes from baseline.

- - 1. Vital signs

Vital signs (blood pressure [systolic blood pressure and diastolic blood pressure], pulse and body temperature) will be listed and summarized by treatment group and protocol-specified collection time point. Observations and their changes from baseline will be summarized by treatment group at each collection time point specified in the protocol.

- - 1. Physical examination

Physical examination results will be listed and summarized by treatment group and protocol-specified collection time point. Observations and their changes from baseline will be summarized by treatment group at each collection time point specified in the protocol.

- - 1. 12-lead ECG

ECG results will be listed and summarized by treatment groups at protocol-specified collection time points. Observations and their changes from baseline will be summarized by treatment group at each collection time point specified in the protocol.

- 1. Population pharmacokinetic analysis

Pharmacokinetics are analyzed based on PopPKS. Plasma concentrations and actual blood sample collection time will be listed by dose regimen and protocol-specified time point, and plasma concentration at each planned time point will be summarized by descriptive statistics (number of subjects, arithmetic mean, standard deviation [SD] and coefficient of variation [%CV], geometric mean, minimum, median and maximum).

A nonlinear mixed effect model [NONMEM] is planned to be used to establish the appropriate population PK model. The individual exposure parameters of the subjects will be estimated based on the parameter estimates of the final PK model established for further exposure-response analysis, including correlation exploratory analysis of PK/efficacy and PK/safety. If the above analyses are performed, the results of these analyses will be reported separately, and independent data analysis plan and analysis report will be prepared.

- 1. Immunogenicity

The anti-Ecnoglutide serum antibody test will be performed pre-dose (D1) and at various time points post-dose (D85, D168, D253 [placebo group only], D399). The proportion and code of subjects who have positive anti-drug antibodies (ADA) in each group will be summarized and listed respectively. If necessary, an *in vitro* study will be further conducted for positive subjects, and an additional detailed ADA analysis reports will be provided separately.

- 1. Handling of Missing Data

In the main analysis, missing target variables are planned to be imputed through RDO and multiple imputation methods. Otherwise, unless otherwise stated, all analyses are based on available observed data and no missing data is imputed. All illogical data and outlier data will be cleared in the review stage before database lock. All data will be analyzed normally during the statistical analysis unless otherwise specified. The detailed imputation methods are provided in the statistical analysis plan (SAP).

- 1. Interim Analysis

No interim analysis is planned for this study.

- 1. Statistical Analysis Plan

Primary endpoints are planned to be analyzed after completing the double-blind treatment period observation in the study and final analysis of the study will be performed after completion of all study visits. A separate SAP will be prepared for this study, and detailed statistical analysis methods will be discussed and finalized by the statistician along with the principal investigator and sponsor before starting the primary endpoint analysis. The final statistical analysis content and protocol will be subject to SAP.

1. Ethical and Regulatory Requirements
   1. Ethical Conduct and Ethical Approval of the Study

This study will be conducted in accordance with GCP and all relevant regulatory requirements, including the current version of *Declaration of Helsinki*.

The investigator (or sponsor, if applicable) is responsible for obtaining Ethics Committee review and approval of the study protocol, study center ICF, and any other information provided to potential subjects (e.g., advertisements or information supporting or supplementing the ICF). The investigator agrees that the Ethics Committee has direct access to all relevant documents. The composition of the Ethics Committee must meet all relevant regulatory requirements. The sponsor will provide the investigator with the relevant documents/materials required for review and approval of the study by the Ethics Committee.

If amendments are made during the study to the study protocol, ICF, or any other information that the Ethics Committee has approved for provision to potential subjects, the investigator is responsible for ensuring the approval of these amended documents by the Ethics Committee. The investigator must follow all relevant regulatory requirements regarding the use of the amended ICF, including obtaining Ethics Committee approval of the amended ICF prior to new subjects consenting to participate in the study using the new form. The approval of the written ICF/other information by the Ethics Committee, and a copy of the amended ICF/other information that has been approved must be sent to the sponsor in a timely manner.

- 1. Informed Consent Procedure

The principal investigators of the study centers will:

- Ensure that each subject is provided with comprehensive and adequate oral or written information about the nature, objective, possible risks and benefits of the study;
- Ensure that each subject is aware that he/she can voluntarily terminate the study at any time;
- Ensure that each subject has the opportunity to ask questions and is given sufficient time to consider the information provided;
- Ensure that each subjects provides a signed and dated ICF before any study related procedures can be performed on them;
- Ensure that the original signed ICF is kept in the investigator’s study file;
- Ensure that the copy of signed ICF is provided to the subject;
- Ensure that any benefits and potential harm to subjects participating in the study are described in the ICF that has been approved by the Ethics Committee.
  1. Amendments to Study Protocol and Informed Consent Form

Study procedures may be modified only after mutual consultation between the principal investigator and the sponsor.

Any significant changes to the study protocol must be documented in the protocol amendments of the latest version of the clinical protocol (if required). The amendments must be approved by the appropriate Ethics Committee and national regulatory authorities before implementation. The sponsor will distribute the latest version of the protocol and any amendments to the principal investigator.

If there is a need to change the site ICF in the study protocol amendments, the ICF amendments can be used after approved by the sponsor and the central Ethics Committee. If required by local regulatory authorities, any changes in administration should be communicated and approved by the respective Ethics Committee.

- 1. Closure of Study Center

At the end of the study, the CRA will work with the investigator or personnel of the study center to conduct the following activities:

- Send all study data back to the sponsor;
- Data query;
- Counting, verification and disposal of unused investigational products;
- Inspect the completeness of study records;
- Send all treatment numbers back to the sponsor;

In addition, the sponsor reserves the right to suspend or permanently terminate a study center at any time for reasons including but not limited to safety, ethical concerns, or serious noncompliance. If the sponsor determines that this measure is necessary, the sponsor will discuss with the investigator (including the reasons for taking the measure). If feasible, the sponsor will notify the investigator in advance before taking measures.

If the study needs to be suspended or terminated for safety reasons, the sponsor will notify the investigator and the study center in a timely manner and will also inform the regulatory authorities of the suspension or termination of the study and the reasons for this measure. The investigator must notify Ethics Committee in a timely manner and provide the reasons for suspension and termination if required by the regulation. If the study is terminated prematurely, all study data must be sent back to the sponsor. Moreover, all unused investigational products will be disposed of in accordance with study-related sponsor processes.

The investigator and/or site will be provided economic compensation according to the agreement signed between the investigator and the sponsor.

- 1. Retention of Records

Study data are preserved according to the following requirements:

- The investigator must maintain all study data.
- A computerized database of all or part of subjects may be established, if deemed necessary by the sponsor, as permitted by local laws/regulations or study center systems;
- The storage period is 5 years after the end of the study.

The investigator must notify the sponsor for any changes to the preservation arrangements. These changes may include, but not limited to: preservation outside the site, transfer of ownership of records due to the investigator leaving the study center, etc. The study data of this clinical study are property of Hangzhou Sciwind Biosciences Co., Ltd., and should not be provided to a third party in any form without the written consent of the sponsor, except for the requirements of the regulatory authorities and the Ethics Committee.

- 1. Confidentiality and Privacy

ICF may contain content that complies with relevant data protection and privacy rights. In some cases, these contents will be recorded in a separate accompanying document.

The investigator, staff involved in the study and the sponsor will keep the subject's privacy, treatment, study protocol, study-related documents and data strictly confidential. Study information or data shall not be disclosed to any unauthorized third party without the written permission of the sponsor.

The study monitor, the authorized representative of the sponsor, the representative of the Ethics Committee and regulatory authorities may review all documents and records required to be maintained by the investigator, including but not limited to medical records (clinic, outpatient, or hospital) and medication records of study subjects. The clinical study center will allow the above-mentioned personnel to access these records.

Each clinical center will strictly maintain contact information of study subjects for internal use during the study. At the end of the study, all records will continue to be kept in a secure location, and the storage duration will be determined according to the requirements of the Ethics Committee, the site system or the sponsor.

- 1. Privacy of Publication

The investigator and study center other personnel shall maintain the confidentiality of all information provided by Hangzhou Sciwind Biosciences Co., Ltd. and all data generated during the study (except for the medical records of subjects). The investigator and study center other personnel should not use the information, data or records for any purpose other than for this study. These restrictions do not apply to:

- The information has been published not due to the error of the investigator or study center personnel;
- Information that must be disclosed in order to be credible to an academic committee or Ethics Committee to evaluate the study;
- Information that must be disclosed in order to provide appropriate health care to the subjects participating in the study.

Otherwise, the study results are published as described in the following paragraph:

The first publication or disclosure of study results should be complete and coordinated by the sponsor. Therefore, any subsequent articles should refer to the initial literature.

The data must be reviewed by the sponsor and the principal investigator of the clinical study center before being summarized, contributed and published by the study center.

Prior to submission for publication, presentation, teaching or disclosure of the study results produced by the study center for other reasons (collectively referred to as “publication”), the investigator shall provide the sponsor with a copy of the proposed publication and provide at least 30 days (at least 5 working days for abstracts) for the sponsor to review the proposed publication. The proposed publication should not contain any information about the sponsor, or personal data such as the name or initials of any subject other than the study results.

At the request of the sponsor, the submission or other disclosure of the proposed publication will be postponed, so that the sponsor has time to apply for patent or similar invention protection of any invention, technical information or other intellectual property rights or industrial property rights disclosed in the proposed publication.

If the publication terms of a written contract for study are inconsistent with this instruction, the publication terms in the contract will be relied upon rather than this instruction.

1. Quality Control and Quality Assurance

According to GCP guidelines, the sponsor should be responsible for implementing and maintaining quality assurance and quality control systems, and written SOPs should be in place. Quality control is applicable to every stage of data processing. Following steps should be taken to ensure the accuracy, consistency, completeness and reliability of data:

- Investigator meetings;
- Visits initiated by the study center;
- Early study center visits after enrollment;
- Routine monitoring of study center;
- Ongoing communication and training of study center;
- Data management and quality control inspection;
- Ongoing data collection and collation;
- Internal data review;
- Quality control inspection of final clinical study report.

In addition, the sponsor and/or CRO clinical quality assurance unit may conduct periodic audits of the study process, including but not limited to study center, study center visits, suppliers, clinical databases, and final clinical study report. All study-related documents, including medical history and concomitant medication records obtained from the authorized representative of the sponsor and the regulatory authorities need to be audited.

- 1. Clinical Monitoring

According to relevant regulations, GCP and the procedures of the sponsor, the sponsor has delegated CRO to conduct all monitoring activities for this clinical study. CRA will work according to SOPs established by the sponsor or CRO, and CRA of CRO has the same rights and responsibilities as that of the sponsor. CRA will establish and maintain regular contact between the investigator and sponsor.

In the contact, CRA will:

- Inspect the study progress;
- Review the collected data;
- Collate with the source documents;
- Identify and solve issues.
- to ensure:
- The authenticity, accuracy and completeness of data.
- The safety and rights of the subjects are protected;
- The study is in compliance with the currently approved study protocol (and any addenda), GCP and all relevant regulatory requirements.
- The investigator allows the CRA to have direct access to all relevant documents and the investigator should schedule personal and staff time to discuss findings and all relevant issues with the CRA.
  1. Quality Assurance Audit/Inspection

Authorized representatives of the sponsor, regulatory authorities or Ethics Committee may conduct audits or inspections at the study center, including source data inspection, etc. The purpose of an audit or inspection is to systematically and independently inspect all study-related activities and records to determine whether these activities and the recording, analysis, and reporting of data are in compliance with the study protocol, GCP, ICH guidelines, and any relevant regulatory requirements. Such audits/inspections may be conducted at any time during or after the study. In the event of an audit or inspection, the investigator and the authority allow the auditor/inspector to have direct access to all relevant documents and the investigator and the authority should schedule personal and staff time to discuss findings and all relevant issues with the auditor/inspector.

1. Clinical Study Report

A clinical study report (CSR) will be prepared with reference to the *Tripartite Harmonized ICH Guideline: Structure and Content of Clinical Study Reports E3 (November 1995),* including:

- Details of where the study was carried out
- Start and completion dates for each phase of the study
- Details of investigational product and manufacturing statement to be provided by the sponsor
- Confirmation of the study and any amendments being reviewed by an independent Ethics Committee or Institutional Review Board.
- A demographic listing for all subjects
- A list of all AEs by investigational product
- Details of all events that may be significant to the study outcome.
- Details of all operations, calculations and transformations performed on the reported data
- The SAP and report will be produced by the sponsor or its agents and included in the final report
- A scientific interpretation of the results
- A description of the study methods used

All comments on the draft report will be considered. The analysis performed by the sponsor or its agents and the statistical results and methods will be included in the report. A final report will be prepared to contain all those sections in the draft and a statement of compliance covering all aspects of the study conducted at the study center and the report in accordance with GCP. This report will be issued by the sponsor.

If required by applicable regulations, an investigator signatory will be identified to approve the CSR. The investigator will be provided reasonable access to statistical tables, figures, and related reports and will have the opportunity to review the complete study results. The sponsor will also provide the investigator with a complete summary of the study results.

1. References

[1] *Guidelines for the Prevention and Treatment of Type 2 Diabetes Mellitus in China (2020 Edition).*

[2] International Diabetes Federation. IDF Diabetes Atlas, 10th edn. Brussels, Belgium: International Diabetes Federation, 2021.

[3] Investigator's Brochure for Ecnoglutide Injection.

[4] *Good Clinical Practice (2020 Edition).*

Appendix I. Criteria for Diagnosis of Diabetes (1999 WHO Criteria)

Diabetes are diagnosed based on blood glucose and clinical symptoms. The following diagnostic criteria were published by WHO and IDF in 1999, recognized by Chinese Diabetes Society in the same year, and recommended to be implemented in China.

[Several notes on diagnostic requirements]

**Diabetes can be diagnosed when:**

1. Presence of typical symptoms with FPG ≥ 7.0 mmol/L or postprandial blood glucose ≥ 11.1 mmol/L or HbA1c ≥ 6.5 %.
2. Absence of typical symptoms, with FPG ≥ 7.0 mmol/L or postprandial blood glucose ≥ 11.1 mmol/L or HbA1c ≥ 6.5 %, and the same results are obtained in the retest.
3. Absence of typical symptoms, and only when FPG ≥ 7.0 mmol/L or postprandial blood glucose ≥ 11.1 mmol/L, 2h blood glucose ≥ 11.1 mmol/L as shown in glucose tolerance test.

**Diabetes can be excluded when:**

1. 2hPBG between 7.8 and 11.1 mmol/L as shown in glucose tolerance test (indicating impaired glucose tolerance (IGT)); FPG between 6.1 and 7.0 mmol/L (indicating impaired fasting glucose).
2. Postprandial blood glucose < 7.8 mmol/L and FPG < 5.6 mmol/L.

[Notes]

1. In patients with severe symptoms and significant high blood glucose level, blood glucose values exceeding the above indicators are required for diagnosis.
2. Diabetes cannot be diagnosed immediately in the presence of acute infection, trauma, surgery, or other stressful situations, although the test result showed a significant high blood glucose level.
3. Asymptomatic patients must be diagnosed based on two blood glucose value exceeding the diagnostic criteria.
4. For children with several severe symptoms, high blood glucose, positive urine glucose and urine ketone body, it won’t be necessary to diagnose diabetes by glucose tolerance test; for those with less severe symptoms, it will be necessary to diagnose diabetes by FPG measurement or glucose tolerance test.
5. The above glucose values refer to venous plasma glucose values. For fingerstick or venous whole blood, normal fasting glucose should be 6.1 mmol/L.

**Table 11. Classification of Glucose Metabolism**

| Glycometabolic states | Venous plasma glucose (mmol/L) | |
| --- | --- | --- |
| FPG | 2h blood glucose after glycemic load |
| Normal blood glucose | <6.1 | <7.8 |
| Impaired FPG | ≥6.1,<7.0 | <7.8 |
| Impaired glucose tolerance | <7.0 | ≥7.8,<11.1 |
| Diabetes mellitus | ≥7.0 | ≥11.1 |
| Note: Impaired FPG and impaired glucose tolerance are collectively referred to as impaired glucose regulation, or prediabetes; the lower limit of reference range of the normal fasting glucose is usually 3.9 mmol/L | | |

**Table 12. Criteria for Diagnosis of Diabetes**

| Criteria for diagnosis | Venous plasma glucose or HbA1c levels |
| --- | --- |
| Typical diabetic symptoms |  |
| With random blood glucose | ≥11.1 mmoI/L |
| Or FPG | ≥7.0 mmol/L |
| Or 0GTT2h blood glucose | ≥11.1 mmol/L |
| Or HbA1c | ≥6.5% |
| Patients without typical symptoms of diabetes need to be reexamined on another day for confirmation |  |

Appendix II. Diagnosis and Treatment Process of Hypoglycaemia - *Guideline for the Prevention and Treatment of Type 2 Diabetes Mellitus in China* (2020 edition)

Hypoglycaemia may occur in diabetic patients during treatment. Hypoglycaemia may cause discomfort or even be life-threatening, which is also the main obstacle to blood glucose control; special attention should be paid.

**Criteria for diagnosis of hypoglycaemia:**

In diabetic patients receiving medication, the diagnostic criterion for hypoglycaemia is blood glucose < 3.9 mmol/L

**Hypoglycaemia grade:**

1. Grade 1 hypoglycaemia: blood glucose < 3.9 mmol/L and ≥ 3.0 mmol/L;
2. Grade 2 hypoglycaemia: blood glucose < 3.0 mmol/L;
3. Grade 3 hypoglycaemia: serious event with no specific blood glucose boundary, accompanied by consciousness and/or physical changes, requiring assistance of another person.

**Clinical manifestations of hypoglycaemia:**

It is associated with blood glucose levels as well as the rate of decline in blood glucose and can manifest as sympathetic hyperactivity (e.g., palpitations, anxiety, sweating, hunger, etc.) and central nervous symptoms (e.g., altered consciousness, cognitive impairment, convulsions, and coma). Hypoglycaemia in elderly patients may often manifest as behavioral abnormalities or other atypical symptoms. Some patients may develop hypoglycaemia without obvious clinical symptoms, which is called asymptomatic hypoglycaemia, and also called nonperceived hypoglycaemia or unconscious hypoglycaemia. Some patients may present with hypoglycaemic coma without premonitory symptoms after recurrent hypoglycaemia.

**Possible causes and preventive measures of hypoglycaemia:**

1. Not eating on time, or eating too little: Patients should have regular quantitative meals, and if the food intake is reduced, the dose of hypoglycemic agents should be reduced accordingly, and meals should be prepared in advance in case of any meal at unscheduled time;
2. Vomiting, diarrhea: Vomiting and diarrhea may reduce body energy (especially carbohydrates) intake, thereby inducing hypoglycaemia. If the patient has vomiting, diarrhea and other manifestations, it is necessary to timely treat and adjust the dose of hypoglycemic agents, while strengthening blood glucose monitoring;
3. Alcohol intake, especially alcohol consumption under fasting condition: Alcohol may directly lead to hypoglycaemia, so alcoholism and alcohol consumption under fasting condition should be avoided;
4. Increased exercise: The appropriate exercise mode should be selected according to the patient's condition and physical fitness, and additional carbohydrate intake should be increased before exercise to prevent the occurrence of hypoglycaemia;
5. Autonomic dysfunction: Diabetic patients are often accompanied by autonomic dysfunction that affects the body's ability to regulate hypoglycaemia and increases the risk of severe hypoglycaemia. At the same time, hypoglycaemia may also induce or aggravate autonomic dysfunction and form a vicious cycle;
6. Hepatic and renal insufficiency: Diabetic patients with hepatic and renal insufficiency are prone to hypoglycaemia, which is related to poor appetite caused by hepatic and renal insufficiency and reduced gluconeogenic capacity and other factors;
7. Application of insulin and insulin secretagogues: Insulin and insulin secretagogues can induce hypoglycaemia, therefore the use of these drugs should start from a lower dose, then gradually increase the dose, and blood glucose monitoring should be conducted regularly. In case of hypoglycaemia, patients should actively search for the cause and adjust the treatment regimen and drug dose timely;
8. Too strict for blood glucose control: Strict blood glucose control increases the risk of hypoglycaemia, and severe hypoglycaemia may be associated with an increased risk of death. Therefore, blood glucose control goals should be appropriately relaxed in diabetic patients with hypoglycaemia, especially severe hypoglycaemia or recurrent hypoglycaemia, in addition to adjusting the treatment regimen;
9. Diabetic patients should routinely carry spare carbohydrate food and have them immediately in case of hypoglycaemia;
10. Self‑monitoring of blood glucose (SMBG) and continuous glucose monitoring (CGM) are important tools to assess the efficacy and early detection of hypoglycaemia. Nocturnal hypoglycaemia is often difficult to detect and is not treated in a timely manner, so SMBG and CGM need to be enhanced in such patients.

**Treatment of hypoglycaemia:**

The blood glucose of diabetic patients < 3.9 mmol/L, indicating that glucose or sugary foods need to be supplemented. Severe hypoglycaemia requires appropriate treatment and monitoring according to the patient's consciousness and blood glucose level (as shown in the figure below).


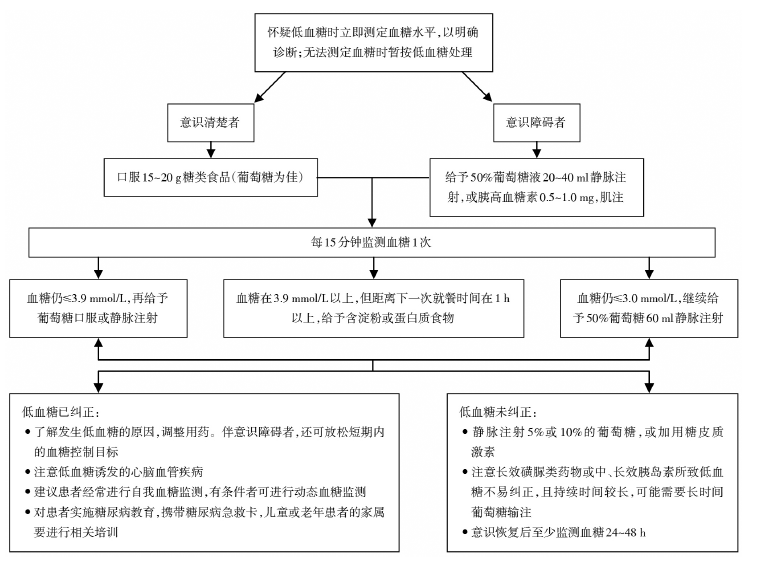


Blood glucose level is measured immediately when hypoglycaemia is suspected to confirm the diagnosis; it is treated as hypoglycaemia temporarily when blood glucose level could not be measured

Patients with clear consciousness

Patients with impaired consciousness

Consumption of 15-20 g sugary food (preferably glucose)

Intravenous administration of 20-40 mL 50% glucose injection, or intramuscular injection of 0.5-1.0 mg glucagon

Monitor blood glucose every 15 min

Glucose is administered orally or intravenously when blood glucose remains ≤ 3.9 mmol/L

Food containing starch or protein is administered when blood glucose level is above 3.9 mmol/L, and more than 1 h from the next meal

Continuous intravenous injection of 50 % glucose 60 mL when blood glucose remains ≤ 3.0 mmol/L

Hypoglycaemia resolved:

- Understand the cause of hypoglycaemia and adjust the medication. Patients with impaired consciousness can also relax short-term blood glucose control
- Pay attention to hypoglycaemia-induced cardiovascular and cerebrovascular diseases
- Advise patients to perform frequent self-monitoring of blood glucose and continuous glucose monitoring if available
- Implement diabetes education for patients, carry diabetes emergency card, and provide relevant training for family members of children or elderly patients

Hypoglycaemia not resolved:

- Intravenous injection of 5% or 10% glucose, or plus glucocorticoids
- Note that hypoglycaemia caused by long-acting sulfonylureas or medium and long-acting insulins is not easily cured and lasts for a long time and may require prolonged glucose infusion
- Monitor blood glucose for at least 24-48 h following recovery of consciousness

**Diagnosis and treatment process of hypoglycaemia**

Appendix III. Self-monitoring of Blood Glucose

At Visit -2 (V-2), all subjects are provided with a uniform brand and model of glucometer by the sponsor and instructed to perform self-monitoring of blood glucose and are advised to perform FPG monitoring in morning at least thrice a week on different days during the clinical study and to record it in the diary card. In addition, subjects need to be informed that in case of hypoglycaemia (see Appendix II) or hyperglycaemia (see Section 11.3.3 in Text), they should promptly contact the investigator and perform another blood glucose test at the investigator's request; if the investigator deems necessary, 7-point self-monitoring of blood glucose is performed and the results are recorded.

Appendix IV. Diet and Exercise Guidance - *Guideline for the Prevention and Treatment of Type 2 Diabetes Mellitus in China* (2020 edition)

1. **Medical Nutrition Therapy for Type 2 Diabetes Mellitus**

Medical nutrition therapy is to take special intervention measures for nutritional problems of patients with diabetes or prediabetes under clinical conditions and participate in the whole process management of patients, including individualized nutritional assessment, nutritional diagnosis, development of corresponding nutritional intervention plans, and implementation and monitoring within a certain period of time. The studies in recent years have confirmed that nutritional therapy has become an important means of preventing and treating diabetes and its complications.

**Objectives of medical nutrition therapy**

- - - 1. To promote and maintain healthy eating habits, emphasizing the selection of appropriate foods, and improving overall health.
      2. To achieve and maintain reasonable body weight, obtain good control of blood glucose, blood pressure, blood lipids and delay the occurrence of diabetic complications.
      3. To provide a nutritionally balanced diet. To meet the needs of personal background, culture, etc., more types of nutritious foods can be selected and behavioral changes can be performed.

**Dietary nutritional factors**

1. Energy
   - - 1. Patients with prediabetes or diabetes should receive an individualized energy balance program with the goal of achieving or maintaining ideal body weight while meeting nutritional needs in different situations.
       2. For all overweight or obese diabetic patients, lifestyle modification should be performed to control total energy intake and reduce body weight by at least 5 %.
       3. Chronic nutritional therapy with very low energy (< 800 kcal/d) is not recommended for diabetic patients.
2. Fat
3. 1. Dietary fat should provide 20 % to 30 % of the total energy. In case of high quality fats (such as those composed of monounsaturated fatty acids and omega-3 polyunsaturated fatty acids), the percentage of energy from fat can be increased to 35%.
4. The intake of saturated and trans fatty acids should be limited as much as possible. Monounsaturated fatty acids and omega-3 polyunsaturated fatty acids (such as fish oil, some nuts, and seeds) help improve blood glucose and lipids and can be increased appropriately.
5. According to the Dietary Guidelines for Chinese Residents (2016), excessive intake of dietary cholesterol should be controlled.
6. Carbohydrate
7. For most patients with diabetes, 50% to 65% of their total energy from carbohydrates in their diet is recommended. The experience of carbohydrate quantity and quality is a key link in glycaemia control. Energy supply ratio of compounds.
8. Foods with low glycemic index help glycaemia control
9. Keep regular and quantitative meals, and try to maintain a uniform carbohydrate distribution
10. Increase dietary fiber intake.
11. Intake of sucrose, fructose products such as corn syrup is strictly controlled, and appropriate intake of sugar alcohols and non-nutritional sweeteners is recommended for diabetic patients who prefer sweets.
12. Protein
13. In diabetic patients with normal renal function, the recommended energy supply ratio of protein is 15% - 20%, and high-quality protein should account for more than half of the total protein.
14. Protein intake should be controlled at 0.8 g/kg body weight daily in diabetic patients with overt proteinuria or decreased glomerular filtration rate.
15. Alcohol use
16. Alcohol use in diabetic patients is not recommended. If alcohol is consumed, the total energy contained in the alcohol should be calculated.
17. Women should not consume more than 15 g of alcohol a day and men should not drink more than 25 g (15 g of alcohol is equivalent to 350 mL of beer, 150 mL of wine or 45 mL of distilled spirits). No more than 2 drinks per week.
18. Be alert to possible alcohol-induced hypoglycaemia and avoid alcohol use under fasting condition.
19. Salt
20. The salt intake should be limited to less than 5 g per day, and further limited in patients with hypertension.
21. At the same time, intake of foods with high salt content should be restricted, such as sodium glutamate, soy sauce, salt soaking and other processed foods, seasoning sauce.
22. Micronutrients

Diabetic patients are prone to lack B vitamins, vitamin C, vitamin D and chromium, zinc, selenium, magnesium, iron, manganese and other micronutrients, which can be supplemented appropriately according to the results of nutritional assessment. Long-term massive supplementation of vitamins, trace elements and plant extracts and other preparations is not recommended, and its long-term safety and effect to improve clinical outcomes need to be verified.

1. Meal pattern

Specific dietary patterns are not recommended for patients with diabetes. Mediterranean diet, vegetarian diet, low carbohydrate diet, low fat and low energy diet all contribute to weight control in the short term, but they are required to be consumed under the guidance of professionals and consideration of the patient's metabolic goals and personal preferences (such as customs, culture, religion, health concept and economic status), and changes in blood lipids, renal function, and visceral proteins are required to be monitored.

**Nutrition education and management**

Nutrition education and management help improve glucose tolerance, reduce the risk of developing diabetes in prediabetes, and help reduce the occurrence of chronic complications in diabetic patients. Individualized goals and plans for nutrition education and management should be developed for diabetic patients.

1. **Physical therapy for type 2 diabetes**

Exercise plays an important role in the comprehensive management of T2DM patients. Regular exercise can increase insulin sensitivity, improve body composition and quality of life, help to control blood glucose, reduce cardiovascular risk factors and has a significant effect on the primary prevention of high-risk population of diabetes. Epidemiological studies have shown that regular exercise for more than 8 weeks can reduce HbA1c by 0.66 % in T2DM patients; diabetic patients who adhere to regular exercise have a significantly reduced risk of death.

**Patients with T2DM should exercise according to the following principles:**

1. Physical therapy should be performed under the guidance of relevant professionals. Necessary health evaluation and exercise ability evaluation before exercise are helpful to ensure the safety and scientificity of physical therapy.
2. Adult patients with T2DM should have moderate intensity (50% to 70% of maximal heart rate, little effort during exercise, and quicken but not rapid heartbeat and respiration) aerobic exercise for at least 150 min per week (e.g., 5 days of exercise per week for 30 min). Even a short period of physical exercise (e.g., 10 min), accumulating 30 min/d, is helpful.
3. Moderate intensity sports include walking, Tai Chi, cycling, table tennis, badminton and golf. Higher intensity sports include fast-paced dancing, aerobic exercise, swimming, cycling uphill, soccer, basketball, etc.
4. If there are no contraindications, it would be better to perform resistance exercise 2 to 3 times a week (with an interval of ≥ 48 h between exercises) to exercise muscle strength and endurance. The exercise site should include the upper limbs, lower limbs, trunk and other major muscle groups, and the training intensity should be moderate. Combined resistance exercise and aerobic exercise may result in a greater degree of metabolic improvement.
5. Exercise programs should be adapted to the patient's age, condition, preference and physical endurance, and should be regularly evaluated and adjusted as appropriate. The use of wearable sports devices, such as pedometers, can help improve exercise compliance. Blood glucose monitoring should be strengthened before and after exercise. Patients should be advised to temporarily adjust their diet and drug treatment regimen during heavy or intense exercise to avoid hypoglycaemia. Attention should be paid to water supplementation during exercise timely.
6. Developing healthy habits. Cultivating active lifestyles, such as increasing daily physical activity, breaking sedentary behavior, and reducing sedentary time, integrating beneficial physical exercises into daily life.
7. Exercises are contraindicated under the following conditions, severe hypoglycaemia, acute metabolic complications (e.g. diabetic ketoacidosis), combined acute infection, proliferative diabetic retinopathy, severe cardiovascular and cerebrovascular diseases (unstable angina pectoris, severe arrhythmia, transient ischemic attack), and can be gradually resumed after stable disease control.
8. People with T2DM generally do not have to postpone exercise due to hyperglycaemia as long as they feel well. If blood glucose is > 16.7 mmol/L during strenuous physical activity, attention should be paid to ensure adequate hydration supplied.

Appendix V. Salvage Treatment Drugs

Rescue medications will be administered by the investigator according to the latest T2DM treatment guidelines if the subject who met criteria for hyperglycaemia (see 11.3.3 for details) as determined by the investigator requires salvage therapy; metformin is preferred and the dose will be adjusted at the investigator's discretion according to the subject's blood glucose (as appropriate).

GLP-1 receptor agonists, dipeptidyl peptidase 4 (DPP-4) inhibitors are not allowed to be used as salvage treatment drugs.

| **Drug classification** | **Representative drug** |
| --- | --- |
| Biguanides | Metformin |
| Insulin Secretagogue - Sulfonylureas | Glibenclamide, Gliclazide, Glimepiride, Glipizide, Gliquidone |
| Insulin Secretagogue - Glinides | Repaglinide, Nateglinide, Mitiglinide |
| Thiazolidinediones | Pioglitazone, Rosiglitazone and its compound formulations with Metformin |
| α-Glucosidase inhibitor | Acarbose, Voglibose, Miglitol |
| Sodium-glucose co-transporter 2 (SGLT2) inhibitors | Empagliflozin, Canagliflozin, Dapagliflozin, Ertugliflozin |
| Insulin formulation | Animal insulin, human insulin, insulin analogues |

Appendix VI. Calculation Method/Formula for Estimated Glomerular Filtration Rate (eGFR)

eGFR (MDRD) = 186 × (Scr) -1.154 × age-0.203 × 0.742 (female)

eGFR (MDRD) = 186 × (Scr) -1.154 × age-0.203 × 1 (male)

Note: Scr refers to serum creatinine (μmol/L), in which the conversion of serum creatinine is as follows: 1 μmol/L = 0.01131 mg/dL

Appendix VII. Classification of NYHA Heart Function Criteria

**Table 13. Classification of NYHA Heart Function Criteria**

| **Grade** | **Behavior status** |
| --- | --- |
| **Grade I** | Unrestricted activities, as regular physical activity will not cause excessive fatigue, palpitation, or dyspnea |
| **Grade II** | Slightly restricted activities, relieved during rest, daily activities can cause fatigue, palpitation, or dyspnea |
| **Grade III** | Restricted activities, no symptoms at rest, and a small amount of activity can cause significant fatigue, palpitation, or dyspnea |
| **Grade IV** | Unable to engage in any physical activity comfortably. Symptoms of cardiac dysfunction may be present even at rest. Any physical activity increases discomfort |

Appendix VIII. Body Weight and Height Measurement Instructions

1. **Height measurement**
2. Before measurement, subjects are required to be barehead, barefoot, and unbun.
3. The measurements are performed using a calibrated height gauge.
4. Keep the head in an upright position and look straight ahead with both eyes.
5. Gently move the measurement arm to the participant's head until the bottom contacts the apex of the head.
6. Observe whether the subject's posture is correct and take a reading after confirming that the posture is correct.
7. Read the height value corresponding to the exact point, and measure the result in centimeters, with an accuracy of 0.1 cm.
8. **Body weight measurement**
9. Before each measurement, the subject should be under fasting condition and try to empty his/her bladder, remove his/her shoes and coat, and only wear close-fitting clothing.
10. Weighing should be performed using a calibrated scale (mechanical or electronic) in a uniform manner and the same scale whenever possible.
11. The pointer of the scale should be zeroed before weighing.
12. Scale should be placed on a firm and smooth surface (rather than carpet or inclined or rough surfaces) before weighing.
13. Subjects are required to stand on the scale and place both feet on each side of the scale. Subjects are required to stand still, with their arms placed on both sides of their body, and their weight is recorded in kilograms (kg), and rounded to one decimal place.
14. The average of 2 measurements is taken as the measurement result.

Appendix IX. Waist Circumference and Hip Circumference Measurement Instructions

- 1. Subjects are required to stand naturally, relax shoulders and abdomen, breath steadily, place their arms on both sides of the body, bring their feet together, and bear weight evenly on both legs.
  2. Horizontal position of waist circumference measurement: Midpoint of the line connecting the anterior superior iliac spine and the inferior costal arch of bilateral midaxillary line.
  3. Horizontal position of hip circumference measurement: Maximum circumference of the hip.
  4. Circle around the above horizontal position with a tape measure, measuring close to the skin (not through clothing) but not strangling the skin, and have the same designated person take the measurements whenever possible. Measure waist circumference and hip circumference twice each, and proceed in the following order: waist circumference, hip circumference; waist circumference, hip circumference.
  5. When measuring, do not consciously retract or straighten the abdomen. Take a reading at the end of a calm exhalation (measured in centimeters), with the value rounded to one decimal place (e.g., 89.3 cm).
  6. The average of 2 measurements is taken as the measurement result. If the difference between 2 measurements exceeds 1 cm, discard the set of measurements and repeat the measurement.
